# Supplementary material for: Temporal Evolution and Associated Factors of Adherence to Mammography Screening among Women in Spain: Results from Two National Health Surveys (2017–2020)
Source: MDPI journal article supplement (doi:10.3390/healthcare11222934), 2023-11-09
Supplement: s1 [file s1]

---

**ENCUESTA NACIONAL DE SALUD  
2017**

***CUESTIONARIO DE ADULTOS***

**Entrevistador/a:** Recuerde que la persona entrevistada debe ser la persona adulta seleccionada salvo en los casos excepcionales recogidos en el manual.

**Entrevistador/a, léale al informante:** “Las siguientes preguntas conciernen únicamente a la persona adulta seleccionada, es decir, a:

**Nombre Apellido1 Apellido2 (del adulto seleccionado)**

**Sexo:** \_\_\_\_\_

**Edad:** \_ \_ \_ años”

**Número de orden:** \_ \_

**Proxy\_0. ¿El informante es la persona seleccionada?**

- Sí \_\_\_\_\_  1 → [Ir a Introducción P.1](#)
- No \_\_\_\_\_  2

**Proxy\_1. ¿Cuál es el motivo por el que la persona seleccionada no puede facilitar personalmente sus datos?**

- La persona seleccionada está ingresada en un sanatorio, hospital, etc., a causa de una enfermedad \_\_\_\_\_  1
- La persona seleccionada está incapacitada para contestar por discapacidad, enfermedad grave, etc. \_\_\_\_\_  2
- La persona seleccionada está incapacitada para contestar por causa del idioma \_\_\_\_\_  3

**Proxy\_2. ¿Es miembro del hogar el informante?**

- Sí \_\_\_\_\_  1 → Listado de miembros del hogar: | \_ | (proxy\_2b) → [Ir a flujo antes de Proxy\\_5](#)
- No \_\_\_\_\_  2

**Proxy\_3. Nombre del informante:** \_\_\_\_\_

Proxy\_3b. Sexo del informante:  1 Hombre  2 Mujer

Proxy\_4. Edad del informante:

Proxy\_5. ¿Cuál es la relación del informante con la persona seleccionada?

- Cónyuge o pareja \_\_\_\_\_  1
- Hijo/Hija \_\_\_\_\_  2
- Padre/madre \_\_\_\_\_  3
- Hermano/hermana \_\_\_\_\_  4
- Otros familiares \_\_\_\_\_  5
- Servicios sociales \_\_\_\_\_  6
- Voluntarios \_\_\_\_\_  7
- Otra relación \_\_\_\_\_  8

## E.- CARACTERÍSTICAS DEMOGRÁFICAS DE LA PERSONA ADULTA SELECCIONADA

Introducción P.1: **Entrevistador/a**, léale al informante: “A continuación voy a hacerle unas preguntas sobre su nacionalidad y su estado civil”.

1. ¿Cuál es su país de nacimiento?

- España \_\_\_\_\_  1
- Extranjero \_\_\_\_\_  2 → **1b-** Seleccionar país
- No sabe \_\_\_\_\_  8
- No contesta \_\_\_\_\_  9

Si P.1=2 → Se activa la correspondiente 1b con un listado de países para seleccionar.

2. ¿Y cuál es su nacionalidad?

- Española \_\_\_\_\_
- Extranjera \_\_\_\_\_  → **2b-** Seleccionar país
- No sabe \_\_\_\_\_
- No contesta \_\_\_\_\_

Si P.1 = 1 → Ir a flujo previo a P.4

**3. ¿Cuántos años lleva residiendo en España?**

Nº de años

NS  98  NC  99

**4. De las siguientes opciones, ¿cuál describe su situación actual?**

- Conviviendo con su cónyuge \_\_\_\_\_  1
- Conviviendo con una pareja de hecho \_\_\_  2
- No conviviendo en pareja \_\_\_\_\_  3
- No sabe \_\_\_\_\_  8
- No contesta \_\_\_\_\_  9

**4b. ¿Cuál es su estado civil legal?**

- @Soltero/a \_\_\_\_\_  1
- @Casado/a \_\_\_\_\_  2
- @Viudo/a \_\_\_\_\_  3
- @Separado/a legalmente \_\_\_\_\_  4
- @Divorciado/a \_\_\_\_\_  5
- No sabe \_\_\_\_\_  8
- No contesta \_\_\_\_\_  9

5. Por favor, detalle a continuación cuál es el mayor nivel de estudios que ha obtenido: \_\_\_\_\_

Entrevistador/a, codifique el nivel de estudios declarado por el adulto seleccionado en el literal anterior:

Nivel de estudios

\_ Nombre1 P.Apellido1 S.Apellido1

Las opciones que aparecen en el desplegable son:

|                                                                                                                                                      |    |
|------------------------------------------------------------------------------------------------------------------------------------------------------|----|
| No sabe leer o escribir (analfabetos)                                                                                                                | 01 |
| Estudios primarios incompletos (ha asistido menos de 5 años a la escuela)                                                                            | 02 |
| Educación primaria completa                                                                                                                          | 10 |
| Primera etapa de educación secundaria sin título de graduado en ESO y equivalentes (EGB, Bachillerato elemental)                                     | 21 |
| Primera etapa de educación secundaria con título de graduado en ESO y similares (EGB, Bachillerato elemental)                                        | 22 |
| Certificados de profesionalidad de nivel 1 y similares                                                                                               | 23 |
| Certificados de profesionalidad de nivel 2 y similares                                                                                               | 24 |
| Bachillerato y similares (BUP, COU, PREU)                                                                                                            | 32 |
| Enseñanzas de formación profesional de grado medio (incluye artes plásticas, diseño, deportivas y similares)                                         | 33 |
| Enseñanzas profesionales de música y danza y similares                                                                                               | 34 |
| Certificado de las escuelas oficiales de idiomas de nivel avanzado y similares                                                                       | 35 |
| Formación profesional básica                                                                                                                         | 38 |
| Certificados de profesionalidad de nivel 3; programas cortos que requieren segunda etapa de secundaria y similares                                   | 41 |
| Enseñanzas de formación profesional de grado superior (incluye artes plásticas, diseño, deportivas y equivalentes)                                   | 51 |
| Títulos propios universitarios que precisan del título de bachiller, de duración igual o superior a 2 años                                           | 52 |
| Grados universitarios de 240 créditos ECTS (plan Bolonia) y equivalentes                                                                             | 61 |
| Diplomados universitarios y equivalentes                                                                                                             | 62 |
| Títulos propios universitarios de experto o especialista de menos de 60 créditos ECTS (plan Bolonia) cuyo acceso requiera ser titulado universitario | 63 |
| Grados universitarios de más de 240 créditos ECTS (plan Bolonia) y equivalentes                                                                      | 71 |
| Licenciados universitarios y equivalentes                                                                                                            | 72 |
| Másteres oficiales universitarios y equivalentes                                                                                                     | 73 |
| Especialidades en Ciencias de la Salud por el sistema de residencia o similares (MIR y equivalentes)                                                 | 74 |
| Títulos propios universitarios de máster (maestrías) de 60 o más créditos ECTS (plan Bolonia) cuyo acceso requiera ser titulado universitario        | 75 |
| Doctorado universitario                                                                                                                              | 81 |
| No contesta                                                                                                                                          | 99 |

## F.- RELACIÓN DE LA PERSONA ADULTA SELECCIONADA CON LA ACTIVIDAD ECONÓMICA

**Introducción P.6:** Entrevistador/a, léale al informante: “Ahora voy a hacerle unas preguntas sobre su relación con la actividad económica”.

Los flujos de este módulo están condicionados a la respuesta de la pregunta 11 del Cuestionario de Hogar para el adulto seleccionado.

Si P.11 (C. Hogar) = 1 → Ir a P.13

Si P.11 (C. Hogar) = 2 → Ir a P.11

Si P.11 (C. Hogar) = 4, 6 ó 7 → Ir a P.12

Si P.11 (C. Hogar) = 3 ó 5 → Ir a P.6

Si P.11 (C. Hogar) = 8 → Ir a Módulo G

### 6. ¿Percibe alguna pensión contributiva?

- Sí, por cotización propia \_\_\_\_\_  1 → Ir a P.18b
- Sí, por cotización de otra persona \_\_\_\_\_  2 → Ir a P.8  
(pensiones de viudedad, orfandad, etc.)
- Sí, por ambos tipos de cotización \_\_\_\_\_  3 → Ir a P.18b
- No \_\_\_\_\_  4
- No sabe \_\_\_\_\_  8
- No contesta \_\_\_\_\_  9

### 7. ¿Ha trabajado antes?

- Sí \_\_\_\_\_  1
- No \_\_\_\_\_  2
- No sabe \_\_\_\_\_  8
- No contesta \_\_\_\_\_  9

Si P.7 = 1 y P.6 = 4, 8 ó 9 → Ir a P.18b

Si P.7 = 2, 8 ó 9 y P.6 = 4, 8 ó 9 → Ir a Módulo G

### 8. ¿Cuál era la actividad de la empresa u organización en la que trabajó en su último empleo la persona que generó la pensión?

**Actividad:**

**Código de actividad**

9. ¿Cuál era la ocupación, profesión u oficio que desempeñó en su último empleo la persona que generó la pensión?

Profesión:

Código de ocupación

10. ¿Cuál era la situación profesional, en su último empleo, de la persona que generó la pensión?

- Asalariado/a (a sueldo, comisión, jornal...) \_\_\_\_\_  1
- Empresario/a o profesional con asalariados \_\_\_\_\_  2
- Empresario/a sin asalariados o trabajador/a independiente \_\_\_\_\_  3
- Ayuda familiar (sin remuneración reglamentada en la empresa o negocio de un familiar) \_\_\_\_\_  4
- Miembro de una cooperativa \_\_\_\_\_  5
- Otra situación \_\_\_\_\_  6
- No sabe \_\_\_\_\_  8
- No contesta \_\_\_\_\_  9

[Ir a Módulo G](#)

11. ¿Cuánto tiempo lleva en desempleo?

- No ha trabajado nunca \_\_\_\_\_  1 → [Ir a Módulo G](#)
- Menos de 6 meses \_\_\_\_\_  2 → [Ir a P.18b](#)
- De 6 meses a menos de 1 año \_\_\_\_\_  3 → [Ir a P.18b](#)
- De 1 año a menos de 2 años \_\_\_\_\_  4 → [Ir a P.18b](#)
- Más de 2 años \_\_\_\_\_  5 → [Ir a P.18b](#)
- No sabe \_\_\_\_\_  8 → [Ir a P.18b](#)
- No contesta \_\_\_\_\_  9 → [Ir a P.18b](#)

12. Aunque actualmente no esté trabajando, ¿ha trabajado alguna vez anteriormente?

- Sí \_\_\_\_\_  1 → [Ir a P.18b](#)
- No \_\_\_\_\_  2 → [Ir a Módulo G](#)
- No sabe \_\_\_\_\_  8 → [Ir a Módulo G](#)
- No contesta \_\_\_\_\_  9 → [Ir a Módulo G](#)

### 13. ¿Qué tipo de contrato o relación laboral tiene?

- @Asalariado/a (a sueldo, comisión, jornal...) \_\_\_\_\_
- @Funcionario/a \_\_\_\_\_  01 → Ir a P.15
- Señale el tipo de contrato: Duración indefinida \_\_\_\_\_  02 → Ir a P.15
- Temporal \_\_\_\_\_  03 → Ir a P.14a
- Verbal o sin contrato \_\_\_\_\_  04 → Ir a P.14b
- @Empresario/a o profesional con asalariados \_\_\_\_\_  05 → Ir a P.15
- @Empresario/a sin asalariados o @trabajador/a independiente \_\_\_\_\_  06 → Imputar P.15=1 e ir a P.16
- Ayuda familiar (sin remuneración reglamentada en la empresa o negocio de un familiar) \_\_\_\_\_  07 → Ir a P.15
- Miembro de una cooperativa \_\_\_\_\_  08 → Ir a P.15
- Otra situación \_\_\_\_\_  09 → Ir a P.15
- No sabe \_\_\_\_\_  98 → Ir a P.15
- No contesta \_\_\_\_\_  99 → Ir a P.15

La subpregunta “Señale el tipo de contrato” está por defecto deshabilitada y se habilita al seleccionar la opción “Asalariado/a (a sueldo, comisión, jornal...)”.

### 14a. ¿Cuál es la duración de su contrato?

- Menor de 6 meses \_\_\_\_\_  1
- De 6 meses a menos de 1 año \_\_\_\_\_  2
- De 1 año a menos de 2 años \_\_\_\_\_  3
- De 2 años o más \_\_\_\_\_  4
- Sin duración definida \_\_\_\_\_  5
- No sabe \_\_\_\_\_  8
- No contesta \_\_\_\_\_  9

### 14b. ¿Cuál es la duración de su relación laboral?

- Menor de 6 meses \_\_\_\_\_  1
- De 6 meses a menos de 1 año \_\_\_\_\_  2
- De 1 año a menos de 2 años \_\_\_\_\_  3
- De 2 años o más \_\_\_\_\_  4
- Sin duración definida \_\_\_\_\_  5
- No sabe \_\_\_\_\_  8
- No contesta \_\_\_\_\_  9



**15. ¿Tiene trabajadores a su cargo?**

- No \_\_\_\_\_  1
- Sí, de 1 a 4 personas \_\_\_\_\_  2
- Sí, de 5 a 10 personas \_\_\_\_\_  3
- Sí, de 11 a 20 personas \_\_\_\_\_  4
- Sí, más de 20 personas \_\_\_\_\_  5
- No sabe \_\_\_\_\_  8
- No contesta \_\_\_\_\_  9

**16. Su trabajo principal actual, ¿es a tiempo completo o a tiempo parcial?**

**Nota P.16:** No se leen las opciones.

- A tiempo completo \_\_\_\_\_  1
- A tiempo parcial \_\_\_\_\_  2
- No sabe \_\_\_\_\_  8
- No contesta \_\_\_\_\_  9

**17. ¿Qué tipo de jornada tiene habitualmente?**

- Jornada partida \_\_\_\_\_  01
- Jornada continua \_\_\_\_\_
- Mañana \_\_\_\_\_  02
- Tarde \_\_\_\_\_  03
- Noche \_\_\_\_\_  04
- Jornada reducida \_\_\_\_\_  05
- Turnos \_\_\_\_\_  06
- Jornada irregular o variable según los días \_\_\_\_\_  07
- Otro tipo \_\_\_\_\_  08
- No sabe \_\_\_\_\_  98
- No contesta \_\_\_\_\_  99

Las opciones de “Mañana”, “Tarde” y “Noche” solo deben aparecer cuando se marque la opción “Jornada continua”.

**18a. ¿Cuál es la actividad de la empresa u organización en la que trabaja actualmente?**

**Actividad:**

**Código de actividad**

**18b. ¿Cuál era la actividad de la empresa u organización en la que trabajó en su último empleo?**

**Actividad:**

**Código de actividad**

[Ir a P.19b](#)

**19a. ¿Cuál es la ocupación, profesión u oficio que desempeña en su empleo?**

**Profesión:**

**Código de ocupación**  → [Ir a Módulo G](#)

**19b. ¿Cuál era la ocupación, profesión u oficio que desempeñó en su último empleo?**

**Profesión:**

**Código de ocupación**

20. ¿Cuál era la situación profesional en la ocupación que desempeñó en su último empleo?

- @Asalariado/a (a sueldo, comisión, jornal...) \_\_\_\_\_  1
- @Empresario/a o profesional con asalariados \_\_\_\_\_  2
- @Empresario/a sin asalariados o @trabajador/a independiente \_\_\_  3
- Ayuda familiar (sin remuneración reglamentada en la empresa o negocio de un familiar) \_\_\_\_\_  4
- Miembro de una cooperativa \_\_\_\_\_  5
- Otra situación \_\_\_\_\_  6
- No sabe \_\_\_\_\_  8
- No contesta \_\_\_\_\_  9

## MÓDULO DE ESTADO DE SALUD

### G.- ESTADO DE SALUD

Introducción P.21: Entrevistador/a, léale al informante: “A continuación le voy a preguntar sobre su salud”.

21. En los últimos doce meses, ¿diría que su estado de salud ha sido muy bueno, bueno, regular, malo, muy malo?

Nota P.21: No se leen las opciones.

- Muy bueno \_\_\_\_\_  1
- Bueno \_\_\_\_\_  2
- Regular \_\_\_\_\_  3
- Malo \_\_\_\_\_  4
- Muy malo \_\_\_\_\_  5

22. ¿Tiene alguna enfermedad o problema de salud crónicos o de larga duración? (Entendemos por larga duración si el problema de salud o enfermedad ha durado o se espera que dure 6 meses o más)

1. Sí  1
2. No  2
3. No sabe  8
4. No contesta  9

**23. Durante al menos los últimos 6 meses, ¿en qué medida se ha visto @limitado/a debido a un problema de salud para realizar las actividades que la gente habitualmente hace?**

- Gravemente @limitado/a \_\_\_\_\_  1
- @Limitado/a, pero no gravemente \_\_\_\_\_  2
- Nada @limitado/a \_\_\_\_\_  3
- No sabe \_\_\_\_\_  8
- No contesta \_\_\_\_\_  9

Si P.23 = 3, 8 ó 9 → Ir a P25

**24. ¿Qué tipo de problema es la causa de su dificultad para realizar las actividades que la gente habitualmente hace?**

- Físico \_\_\_\_\_  1
- Mental \_\_\_\_\_  2
- Ambos \_\_\_\_\_  3
- No sabe \_\_\_\_\_  8
- No contesta \_\_\_\_\_  9

**25. A continuación le voy a leer una lista con una serie de enfermedades o problemas de salud. ¿Padece o ha padecido alguna vez alguna de ellas?**

Nota P.25: Entrevistador/a, léale al informante las enfermedades que se relacionan una a una anotando la respuesta que proceda.

|                                       | 25.a ¿Alguna vez ha padecido ...?                                                                                     | 25.b ¿La ha padecido en los últimos 12 meses?                                                                         | 25.c ¿Le ha dicho un médico que la padece?                                                                            |
|---------------------------------------|-----------------------------------------------------------------------------------------------------------------------|-----------------------------------------------------------------------------------------------------------------------|-----------------------------------------------------------------------------------------------------------------------|
| Tensión alta                          | <input type="radio"/> SI (1) <input type="radio"/> NS(8)<br><input type="radio"/> NO (2) <input type="radio"/> NC (9) | <input type="radio"/> SI (1) <input type="radio"/> NS(8)<br><input type="radio"/> NO (2) <input type="radio"/> NC (9) | <input type="radio"/> SI (1) <input type="radio"/> NS(8)<br><input type="radio"/> NO (2) <input type="radio"/> NC (9) |
| Infarto de miocardio                  | <input type="radio"/> SI (1) <input type="radio"/> NS(8)<br><input type="radio"/> NO (2) <input type="radio"/> NC (9) | <input type="radio"/> SI (1) <input type="radio"/> NS(8)<br><input type="radio"/> NO (2) <input type="radio"/> NC (9) | <input type="radio"/> SI (1) <input type="radio"/> NS(8)<br><input type="radio"/> NO (2) <input type="radio"/> NC (9) |
| Angina de pecho, enfermedad coronaria | <input type="radio"/> SI (1) <input type="radio"/> NS(8)<br><input type="radio"/> NO (2) <input type="radio"/> NC (9) | <input type="radio"/> SI (1) <input type="radio"/> NS(8)<br><input type="radio"/> NO (2) <input type="radio"/> NC (9) | <input type="radio"/> SI (1) <input type="radio"/> NS(8)<br><input type="radio"/> NO (2) <input type="radio"/> NC (9) |
| Otras enfermedades del corazón        | <input type="radio"/> SI (1) <input type="radio"/> NS(8)<br><input type="radio"/> NO (2) <input type="radio"/> NC (9) | <input type="radio"/> SI (1) <input type="radio"/> NS(8)<br><input type="radio"/> NO (2) <input type="radio"/> NC (9) | <input type="radio"/> SI (1) <input type="radio"/> NS(8)<br><input type="radio"/> NO (6) <input type="radio"/> NC (9) |

Lista de Enfermedades que deben aparecer en la pregunta:

|                                                                                                                                    |
|------------------------------------------------------------------------------------------------------------------------------------|
| 1. Tensión alta                                                                                                                    |
| 2. Infarto de miocardio                                                                                                            |
| 3. Angina de pecho, enfermedad coronaria                                                                                           |
| 4. Otras enfermedades del corazón                                                                                                  |
| 5. Varices en las piernas                                                                                                          |
| 6. Artrosis (excluyendo artritis)                                                                                                  |
| 7. Dolor de espalda crónico (cervical)                                                                                             |
| 8. Dolor de espalda crónico (lumbar)                                                                                               |
| 9. Alergia crónica, como rinitis, conjuntivitis o dermatitis alérgica, alergia alimentaria o de otro tipo (asma alérgica excluida) |
| 10. Asma (incluida asma alérgica)                                                                                                  |
| 11. Bronquitis crónica, enfisema, enfermedad pulmonar obstructiva crónica (EPOC)                                                   |
| 12. Diabetes                                                                                                                       |
| 13. Úlcera de estómago o duodeno                                                                                                   |
| 14. Incontinencia urinaria o problemas de control de la orina                                                                      |
| 15. Colesterol alto                                                                                                                |
| 16. Cataratas                                                                                                                      |
| 17. Problemas crónicos de piel                                                                                                     |
| 18. Estreñimiento crónico                                                                                                          |
| 19. Cirrosis, disfunción hepática                                                                                                  |
| 20. Depresión                                                                                                                      |
| 21. Ansiedad crónica                                                                                                               |
| 22. Otros problemas mentales                                                                                                       |
| 23. Ictus (embolia, infarto cerebral, hemorragia cerebral)                                                                         |
| 24. Migraña o dolor de cabeza frecuente                                                                                            |
| 25. Hemorroides                                                                                                                    |
| 26. Tumores malignos                                                                                                               |
| 27. Osteoporosis                                                                                                                   |
| 28. Problemas de tiroides                                                                                                          |
| 29. Problemas de riñón                                                                                                             |
| 30. Problemas de próstata (solo hombres)                                                                                           |
| 31. Problemas del periodo menopáusico (solo mujeres)                                                                               |
| 32. Lesiones o defectos permanentes causados por un accidente                                                                      |

|                                                    |
|----------------------------------------------------|
| 33. ¿Ha padecido alguna otra enfermedad crónica? ↓ |
| 33.1.....                                          |
| 33.2.....                                          |
| 33.3.....                                          |

**H.- ACCIDENTALIDAD**

**26. Durante los últimos 12 meses, ¿ha tenido alguno de los siguientes tipos de accidente en el que haya resultado @herido/a o @lesionado/a?**

**Nota P.26:** Se incluyen los casos de intoxicación, picaduras de insectos y las heridas provocadas por animales. Se excluyen los actos intencionados por parte de otra persona.

|                                             | Sí                           | No                           | No sabe                      | No contesta                  |
|---------------------------------------------|------------------------------|------------------------------|------------------------------|------------------------------|
| <b>A. Accidente de tráfico</b>              | <input type="checkbox"/> (1) | <input type="checkbox"/> (2) | <input type="checkbox"/> (8) | <input type="checkbox"/> (9) |
| <b>B. Accidente en casa</b>                 | <input type="checkbox"/> (1) | <input type="checkbox"/> (2) | <input type="checkbox"/> (8) | <input type="checkbox"/> (9) |
| <b>C. Accidente durante su tiempo libre</b> | <input type="checkbox"/> (1) | <input type="checkbox"/> (2) | <input type="checkbox"/> (8) | <input type="checkbox"/> (9) |

Si P26.A=1 o P26.B=1 o P26.C=1 → Ir a P.27  
 En otro caso, ir a Introducción P.28

**27. ¿Recibió atención médica como consecuencia de este/os accidente/s?**

**Nota P.27:** No se admite respuesta múltiple. En caso de que el informante haya tenido más de un accidente, la respuesta debe reflejar la atención médica recibida por el accidente más grave.

- Ingresó en un hospital \_\_\_\_\_  1
- Acudió a un centro de urgencias \_\_\_\_\_  2
- Consultó a un médico o enfermera \_\_\_\_\_  3
- No hizo ninguna consulta ni intervención \_\_\_\_\_  4
- No sabe \_\_\_\_\_  8
- No contesta \_\_\_\_\_  9

## I.- RESTRICCIÓN DE LA ACTIVIDAD (últimas 2 semanas)

**Introducción P.28:** Entrevistador/a, léale al informante: “A continuación le voy a preguntar sobre restricciones en sus actividades habituales en las 2 últimas semanas, es decir, desde \_\_\_\_\_ (día que corresponde con dos semanas menos) hasta ayer.”

**28.** Durante las últimas 2 semanas, ¿ha tenido que reducir o limitar sus actividades habituales al menos la mitad de un día, por alguno o varios dolores o síntomas?

- Sí \_\_\_\_\_  1 → 28b- ¿Cuántos días?  NS  98  NC  99
- No \_\_\_\_\_  2

Si P.28 = 1 se activa P.28b

**29.** Durante las últimas 2 semanas, ¿se ha visto @obligado/a a quedarse más de la mitad de un día en cama por motivos de salud? (Si ha estado @hospitalizado/a considere también los días pasados en el hospital)

- Sí \_\_\_\_\_  1 → 29b- ¿Cuántos días?  NS  98  NC  99
- No \_\_\_\_\_  2
- No sabe \_\_\_\_\_  8
- No contesta \_\_\_\_\_  9

Si P.29 = 1 se activa P.29b

## K.- LIMITACIONES FÍSICAS, SENSORIALES Y COGNITIVAS

**Introducción P.32:** Entrevistador/a, léale al informante: “A continuación le voy a preguntar sobre situaciones en las que podría encontrarse en su vida diaria. Por favor, no tenga en cuenta los problemas temporales.”

**32.** ¿Utiliza gafas o lentillas?

**Nota P.32:** Entrevistador/a, si el informante es ciego marque la opción “Soy ciego o no puedo ver en absoluto”.

- Sí \_\_\_\_\_  1
- No \_\_\_\_\_  2
- Soy @ciego/a o no puedo ver en absoluto \_\_\_\_\_  3
- No sabe \_\_\_\_\_  8
- No contesta \_\_\_\_\_  9

Si P.32=3,8,9 → Ir a P.34

Si P.32=1 mostrar P33.a

Si P.32=2 mostrar P33.b

**33a. ¿Tiene dificultad para ver utilizando sus gafas o lentillas?**

**33b. ¿Tiene dificultad para ver?**

- No, ninguna dificultad \_\_\_\_\_  1
- Sí, alguna dificultad \_\_\_\_\_  2
- Sí, mucha dificultad \_\_\_\_\_  3
- No puedo ver en absoluto \_\_\_\_\_  4
- No sabe \_\_\_\_\_  8
- No contesta \_\_\_\_\_  9

**34. ¿Utiliza audífono?**

Nota P.34: **Entrevistador/a**, si el informante es sordo marque la opción "Soy sordo profundo".

- Sí \_\_\_\_\_  1
- No \_\_\_\_\_  2
- Soy @sordo/a @profundo/a \_\_\_\_\_  3
- No sabe \_\_\_\_\_  8
- No contesta \_\_\_\_\_  9

Si P.34=3,8,9 → Ir a P.37

Si P.34=1 mostrar P35.a

Si P.34=2 mostrar P35.b

**35a. ¿Tiene dificultad para oír lo que se dice en una conversación con otra persona en un sitio tranquilo utilizando su audífono?**



**35b. ¿Tiene dificultad para oír lo que se dice en una conversación con otra persona en un sitio tranquilo?**

- No, ninguna dificultad \_\_\_\_\_  1
- Sí, alguna dificultad \_\_\_\_\_  2
- Sí, mucha dificultad \_\_\_\_\_  3
- No puedo hacerlo en absoluto \_\_\_\_\_  4
- No sabe \_\_\_\_\_  8
- No contesta \_\_\_\_\_  9

Si P.35 = 4, 8, 9 → Ir a P.37

Si P.34=1 mostrar P36.a

Si P.34=2 mostrar P36.b

**36a. ¿Tiene dificultad para oír lo que se dice en una conversación con otra persona en un sitio más ruidoso aunque utilice su audífono?**

**36b. ¿Tiene dificultad para oír lo que se dice en una conversación con otra persona en un sitio más ruidoso?**

- No, ninguna dificultad \_\_\_\_\_  1
- Sí, alguna dificultad \_\_\_\_\_  2
- Sí, mucha dificultad \_\_\_\_\_  3
- No puedo hacerlo en absoluto \_\_\_\_\_  4
- No sabe \_\_\_\_\_  8
- No contesta \_\_\_\_\_  9

**37. ¿Tiene dificultad para caminar 500 metros sobre un terreno llano sin ningún tipo de ayuda para andar?**

Nota P.37: **Entrevistador/a**, si cree que la pregunta puede ofender al entrevistado dada la situación física evidente (silla de ruedas, amputaciones, etc.) marque la opción "No puedo hacerlo en absoluto".

- No, ninguna dificultad \_\_\_\_\_  1
- Sí, alguna dificultad \_\_\_\_\_  2
- Sí, mucha dificultad \_\_\_\_\_  3
- No puedo hacerlo en absoluto \_\_\_\_\_  4
- No sabe \_\_\_\_\_  8
- No contesta \_\_\_\_\_  9

**38. ¿Tiene dificultad para subir o bajar 12 escalones?**

Nota P.38: **Entrevistador/a**, si cree que la pregunta puede ofender al entrevistado dada la situación física evidente (silla de ruedas, amputaciones, etc.) marque la opción "No puedo hacerlo en absoluto".

- No, ninguna dificultad \_\_\_\_\_  1
- Sí, alguna dificultad \_\_\_\_\_  2
- Sí, mucha dificultad \_\_\_\_\_  3
- No puedo hacerlo en absoluto \_\_\_\_\_  4
- No sabe \_\_\_\_\_  8
- No contesta \_\_\_\_\_  9

Si la persona seleccionada tiene menos de 45 años → Ir a Introducción P.45

**38.a ¿Tiene dificultad para recordar o para concentrarse?**

- No, ninguna dificultad \_\_\_\_\_  1
- Sí, alguna dificultad \_\_\_\_\_  2
- Sí, mucha dificultad \_\_\_\_\_  3
- No puedo hacerlo en absoluto \_\_\_\_\_  4
- No sabe \_\_\_\_\_  8
- No contesta \_\_\_\_\_  9

Si la persona seleccionada tiene menos de 65 años → Ir a Introducción P.45

## L.- LIMITACIONES PARA LA REALIZACIÓN DE LAS ACTIVIDADES DE LA VIDA COTIDIANA

**Introducción P.39:** Entrevistador/a, léale al informante: “Piense ahora en sus actividades básicas diarias. No tenga en cuenta los problemas temporales.”

**39. De las actividades que le voy a leer, ¿habitualmente tiene dificultad para hacerlas sin ayuda?**

| Actividades                                                   | No, ninguna dificultad       | Sí, alguna dificultad        | Sí, mucha dificultad         | No puedo hacerlo por mí @mismo/a | No sabe                      | No contesta                  |
|---------------------------------------------------------------|------------------------------|------------------------------|------------------------------|----------------------------------|------------------------------|------------------------------|
| A. Alimentarse                                                | <input type="checkbox"/> (1) | <input type="checkbox"/> (2) | <input type="checkbox"/> (3) | <input type="checkbox"/> (4)     | <input type="checkbox"/> (8) | <input type="checkbox"/> (9) |
| B. Sentarse, levantarse de una silla o de una cama, acostarse | <input type="checkbox"/> (1) | <input type="checkbox"/> (2) | <input type="checkbox"/> (3) | <input type="checkbox"/> (4)     | <input type="checkbox"/> (8) | <input type="checkbox"/> (9) |
| C. Vestirse y desvestirse                                     | <input type="checkbox"/> (1) | <input type="checkbox"/> (2) | <input type="checkbox"/> (3) | <input type="checkbox"/> (4)     | <input type="checkbox"/> (8) | <input type="checkbox"/> (9) |
| D. Ir al servicio                                             | <input type="checkbox"/> (1) | <input type="checkbox"/> (2) | <input type="checkbox"/> (3) | <input type="checkbox"/> (4)     | <input type="checkbox"/> (8) | <input type="checkbox"/> (9) |
| E. Ducharse o bañarse                                         | <input type="checkbox"/> (1) | <input type="checkbox"/> (2) | <input type="checkbox"/> (3) | <input type="checkbox"/> (4)     | <input type="checkbox"/> (8) | <input type="checkbox"/> (9) |

Si P39.A=2,3,4 o P39.B=2,3,4 o P39.C=2,3,4 o P39.D=2,3,4 o P39.E=2,3,4 → Ir a Introducción P.40

En otro caso → ir a Introducción P.42

**Introducción P.40:** Entrevistador/a, léale al informante: “Considerando esta actividad o actividades en las que usted encuentra dificultades para hacerlas”.

**40. ¿Dispone habitualmente de ayuda para realizarlas?**

- Sí, al menos para una actividad \_\_\_\_\_  1  
 No \_\_\_\_\_  2  
 No sabe \_\_\_\_\_  8  
 No contesta \_\_\_\_\_  9

Si P.40 = 8,9 → Ir a Introducción P.42

Si P.40 =1 mostrar P41.a

Si P.40 =2 mostrar P41.b

**P41a. ¿Necesitaría más ayuda de la que dispone?**  
**P41b. ¿Considera que necesita ayuda?**

- Sí, al menos para una actividad \_\_\_\_\_  1  
 No \_\_\_\_\_  2  
 No sabe \_\_\_\_\_  8  
 No contesta \_\_\_\_\_  9

**Introducción P.42: Entrevistador/a, léale al informante: “A continuación, le voy a leer una serie de actividades relacionadas con el hogar. De nuevo, no incluya problemas temporales”.**

**P42. ¿Habitualmente tiene dificultad para hacer por sí @mismo/a y sin ayuda alguna de estas actividades?**

| Actividades                                                                                                                                    | No, ninguna dificultad       | Sí, alguna dificultad        | Sí, mucha dificultad         | No puedo hacerlo en absoluto | No aplicable (nunca lo ha intentado o necesitado hacerlo) | No Sabe                      | No Contesta                  |
|------------------------------------------------------------------------------------------------------------------------------------------------|------------------------------|------------------------------|------------------------------|------------------------------|-----------------------------------------------------------|------------------------------|------------------------------|
| A. Preparar las comidas                                                                                                                        | <input type="checkbox"/> (1) | <input type="checkbox"/> (2) | <input type="checkbox"/> (3) | <input type="checkbox"/> (4) | <input type="checkbox"/> (5)                              | <input type="checkbox"/> (8) | <input type="checkbox"/> (9) |
| B. Utilizar el teléfono (buscar el número, marcar...)                                                                                          | <input type="checkbox"/> (1) | <input type="checkbox"/> (2) | <input type="checkbox"/> (3) | <input type="checkbox"/> (4) | <input type="checkbox"/> (5)                              | <input type="checkbox"/> (8) | <input type="checkbox"/> (9) |
| C. Realizar compras (comprar la comida, la ropa...)                                                                                            | <input type="checkbox"/> (1) | <input type="checkbox"/> (2) | <input type="checkbox"/> (3) | <input type="checkbox"/> (4) | <input type="checkbox"/> (5)                              | <input type="checkbox"/> (8) | <input type="checkbox"/> (9) |
| D. Tomar sus medicamentos, incluyendo acordarse de la cantidad y el momento en que los debe tomar                                              | <input type="checkbox"/> (1) | <input type="checkbox"/> (2) | <input type="checkbox"/> (3) | <input type="checkbox"/> (4) | <input type="checkbox"/> (5)                              | <input type="checkbox"/> (8) | <input type="checkbox"/> (9) |
| E. Realizar tareas domésticas ligeras como hacer la colada, hacer la cama, limpiar la casa...                                                  | <input type="checkbox"/> (1) | <input type="checkbox"/> (2) | <input type="checkbox"/> (3) | <input type="checkbox"/> (4) | <input type="checkbox"/> (5)                              | <input type="checkbox"/> (8) | <input type="checkbox"/> (9) |
| F. Realizar ocasionalmente tareas domésticas que requieren un gran esfuerzo como mover muebles, limpiar las ventanas, transportar la compra... | <input type="checkbox"/> (1) | <input type="checkbox"/> (2) | <input type="checkbox"/> (3) | <input type="checkbox"/> (4) | <input type="checkbox"/> (5)                              | <input type="checkbox"/> (8) | <input type="checkbox"/> (9) |

|                                                                                         |                              |                              |                              |                              |                              |                              |                              |
|-----------------------------------------------------------------------------------------|------------------------------|------------------------------|------------------------------|------------------------------|------------------------------|------------------------------|------------------------------|
| G. Administrar su propio dinero (pagar recibos, tratar con el banco, firmar cheques...) | <input type="checkbox"/> (1) | <input type="checkbox"/> (2) | <input type="checkbox"/> (3) | <input type="checkbox"/> (4) | <input type="checkbox"/> (5) | <input type="checkbox"/> (8) | <input type="checkbox"/> (9) |
|-----------------------------------------------------------------------------------------|------------------------------|------------------------------|------------------------------|------------------------------|------------------------------|------------------------------|------------------------------|

Si P42.A=2,3,4 o P42.B=2,3,4 o P42.C=2,3,4 o P42.D=2,3,4 o P42.E=2,3,4 o P42.F=2,3,4 o P42.G=2,3,4 → Ir a Introducción P.43

En otro caso → Ir a Introducción P.45

**Introducción P.43:** Entrevistador/a, léale al informante: “Considerando esta actividad o actividades en las que usted encuentra dificultades para hacerlas.”

**43. ¿Dispone habitualmente de ayuda para realizarlas?**

- Sí, al menos para una actividad \_\_\_\_\_  1
- No \_\_\_\_\_  2
- No sabe \_\_\_\_\_  8
- No contesta \_\_\_\_\_  9

Si P.43 = 8,9 → Ir a Introducción P.45

Si P.43 = 1 mostrar P44.a

Si P.43 = 2 mostrar P44.b

**P44a. ¿Necesitaría más ayuda de la que dispone?**

**P44b. ¿Considera que necesita ayuda?**

- Sí, al menos para una actividad \_\_\_\_\_  1
- No \_\_\_\_\_  2
- No sabe \_\_\_\_\_  8
- No contesta \_\_\_\_\_  9

**Introducción P.45:** Entrevistador/a, léale al informante: “Las siguientes preguntas se refieren al dolor físico que ha podido tener en las últimas 4 semanas”.

**P45. Durante las 4 últimas semanas, ¿qué grado de dolor ha padecido?**

- Ninguno \_\_\_\_\_  1
- Muy leve \_\_\_\_\_  2
- Leve \_\_\_\_\_  3
- Moderado \_\_\_\_\_  4
- Severo \_\_\_\_\_  5
- Extremo \_\_\_\_\_  6
- No sabe \_\_\_\_\_  8
- No contesta \_\_\_\_\_  9

**P46. Durante las 4 últimas semanas, ¿hasta qué punto el dolor afectó a sus actividades cotidianas?**

- Nada \_\_\_\_\_  1
- Un poco \_\_\_\_\_  2
- Moderadamente \_\_\_\_\_  3
- Bastante \_\_\_\_\_  4
- Mucho \_\_\_\_\_  5
- No sabe \_\_\_\_\_  8
- No contesta \_\_\_\_\_  9

## **M.- SALUD MENTAL Y ESTRÉS LABORAL**

### **Introducción P.47:**

Ahora nos gustaría saber cómo se ha sentido, en general, durante las últimas semanas. Por favor, conteste a todas las preguntas indicando la respuesta que, a su juicio, mejor puede aplicarse a usted. Recuerde que sólo debe responder sobre los problemas recientes y los que tiene ahora, no sobre los que tuvo en el pasado.

Es importante que intente contestar todas las preguntas.

**Entrevistador/a, léale al informante:** “Voy a entregarle una tarjeta con las preguntas sobre la frecuencia con la que se ha sentido o encontrado como dice cada pregunta. Cuando le pregunte, dígame sólo el número de su respuesta. Tenga en cuenta que las respuestas no son iguales para todas las preguntas”.

**Nota P.47:** **Entrevistador/a,** el concepto “últimas semanas” lo debe interpretar el informante como desee.

|                                                                             | 0                                                  | 1                                               | 2                                                    | 3                                                          | 8                                | 9                                    |
|-----------------------------------------------------------------------------|----------------------------------------------------|-------------------------------------------------|------------------------------------------------------|------------------------------------------------------------|----------------------------------|--------------------------------------|
| 1.- ¿Ha podido concentrarse bien en lo que hacía?                           | Mejor que lo habitual<br><input type="radio"/>     | Igual que lo habitual<br><input type="radio"/>  | Menos que lo habitual<br><input type="radio"/>       | Mucho menos que lo habitual<br><input type="radio"/>       | No sabe<br><input type="radio"/> | No contesta<br><input type="radio"/> |
| 2.- ¿Sus preocupaciones le han hecho perder mucho sueño?                    | No, en absoluto<br><input type="radio"/>           | No más que lo habitual<br><input type="radio"/> | Algo más que lo habitual<br><input type="radio"/>    | Mucho más que lo habitual<br><input type="radio"/>         | No sabe<br><input type="radio"/> | No contesta<br><input type="radio"/> |
| 3.- ¿Ha sentido que está desempeñando un papel útil en la vida?             | Más útil que lo habitual<br><input type="radio"/>  | Igual que lo habitual<br><input type="radio"/>  | Menos útil que lo habitual<br><input type="radio"/>  | Mucho menos útil que lo habitual<br><input type="radio"/>  | No sabe<br><input type="radio"/> | No contesta<br><input type="radio"/> |
| 4.- ¿Se ha sentido capaz de tomar decisiones?                               | Más que lo habitual<br><input type="radio"/>       | Igual que lo habitual<br><input type="radio"/>  | Menos que lo habitual<br><input type="radio"/>       | Mucho menos que lo habitual<br><input type="radio"/>       | No sabe<br><input type="radio"/> | No contesta<br><input type="radio"/> |
| 5.- ¿Se ha notado constantemente agobiado y en tensión?                     | No, en absoluto<br><input type="radio"/>           | No más que lo habitual<br><input type="radio"/> | Algo más que lo habitual<br><input type="radio"/>    | Mucho más que lo habitual<br><input type="radio"/>         | No sabe<br><input type="radio"/> | No contesta<br><input type="radio"/> |
| 6.- ¿Ha tenido la sensación de que no puede superar sus dificultades?       | No, en absoluto<br><input type="radio"/>           | No más que lo habitual<br><input type="radio"/> | Algo más que lo habitual<br><input type="radio"/>    | Mucho más que lo habitual<br><input type="radio"/>         | No sabe<br><input type="radio"/> | No contesta<br><input type="radio"/> |
| 7.- ¿Ha sido capaz de disfrutar de sus actividades normales de cada día?    | Más que lo habitual<br><input type="radio"/>       | Igual que lo habitual<br><input type="radio"/>  | Menos que lo habitual<br><input type="radio"/>       | Mucho menos que lo habitual<br><input type="radio"/>       | No sabe<br><input type="radio"/> | No contesta<br><input type="radio"/> |
| 8.- ¿Ha sido capaz de hacer frente adecuadamente a sus problemas?           | Más capaz que lo habitual<br><input type="radio"/> | Igual que lo habitual<br><input type="radio"/>  | Menos capaz que lo habitual<br><input type="radio"/> | Mucho menos capaz que lo habitual<br><input type="radio"/> | No sabe<br><input type="radio"/> | No contesta<br><input type="radio"/> |
| 9.- ¿Se ha sentido poco feliz o deprimido?                                  | No, en absoluto<br><input type="radio"/>           | No más que lo habitual<br><input type="radio"/> | Algo más que lo habitual<br><input type="radio"/>    | Mucho más que lo habitual<br><input type="radio"/>         | No sabe<br><input type="radio"/> | No contesta<br><input type="radio"/> |
| 10.- ¿Ha perdido confianza en sí mismo?                                     | No, en absoluto<br><input type="radio"/>           | No más que lo habitual<br><input type="radio"/> | Algo más que lo habitual<br><input type="radio"/>    | Mucho más que lo habitual<br><input type="radio"/>         | No sabe<br><input type="radio"/> | No contesta<br><input type="radio"/> |
| 11.- ¿Ha pensado que usted es una persona que no vale para nada?            | No, en absoluto<br><input type="radio"/>           | No más que lo habitual<br><input type="radio"/> | Algo más que lo habitual<br><input type="radio"/>    | Mucho más que lo habitual<br><input type="radio"/>         | No sabe<br><input type="radio"/> | No contesta<br><input type="radio"/> |
| 12.- ¿Se siente razonablemente feliz considerando todas las circunstancias? | Más que lo habitual<br><input type="radio"/>       | Igual que lo habitual<br><input type="radio"/>  | Menos que lo habitual<br><input type="radio"/>       | Mucho menos que lo habitual<br><input type="radio"/>       | No sabe<br><input type="radio"/> | No contesta<br><input type="radio"/> |

Si P.11 (Cuestionario del Hogar) = 1 para el adulto seleccionado → Ir a P.47.a

Si P.11 (Cuestionario del Hogar) <> 1 para el adulto seleccionado → Ir a Introducción P48

**Introducción P. 47.a:** Entrevistador/a, léale al informante: “Las siguientes preguntas van dirigidas a conocer cuáles son las condiciones en que realiza el trabajo”.

**47.a- Globalmente y teniendo en cuenta las condiciones en que realiza su trabajo, indique cómo considera Ud. el nivel de estrés de su trabajo según una escala de 1 (nada estresante) a 7 (muy estresante):**

|   |   |   |   |   |   |   |
|---|---|---|---|---|---|---|
| 1 | 2 | 3 | 4 | 5 | 6 | 7 |
|---|---|---|---|---|---|---|

- No sabe \_\_\_\_\_  8
- No contesta \_\_\_\_\_  9

47.b- Teniendo en cuenta las características de su trabajo, indique en qué medida considera su trabajo satisfactorio según una escala de 1 (nada satisfactorio) a 7 (muy satisfactorio):

|   |   |   |   |   |   |   |
|---|---|---|---|---|---|---|
| 1 | 2 | 3 | 4 | 5 | 6 | 7 |
|---|---|---|---|---|---|---|

- No sabe \_\_\_\_\_  8
- No contesta \_\_\_\_\_  9

## MÓDULO DE ASISTENCIA SANITARIA

### N.- CONSULTAS MÉDICAS Y OTROS SERVICIOS AMBULATORIOS

**Introducción P.48:** Entrevistador/a, léale al informante: “El siguiente grupo de preguntas hace referencia a las consultas con su médico general o médico de familia. Por favor, incluya tanto las visitas a la consulta de su médico, como las visitas domiciliarias y las consultas telefónicas.”

48. ¿Cuándo fue la última vez que consultó al médico general o médico de familia para usted @mismo/a?

- En las últimas 4 semanas \_\_\_\_\_  1
- Entre 4 semanas y 12 meses \_\_\_\_\_  2
- Hace 12 meses o más \_\_\_\_\_  3
- Nunca \_\_\_\_\_  4

Si P.48= 2 → Imputar P.49=00 e ir a Introducción P.50

Si P.48= 3,4 → Ir a Introducción P.50

49. Durante las últimas 4 semanas contando desde ayer, es decir, desde el \_\_\_\_\_ (fecha del día anterior a la entrevista menos 28 días), ¿cuántas veces ha consultado con su médico general o médico de familia para usted @mismo/a?

\_\_\_\_|\_\_\_\_| N° de veces      **NS**  98      **NC**  99



**Introducción P.50: Entrevistador/a, léale al informante: “Las siguientes preguntas hacen referencia a consultas a especialistas. Se incluyen sólo las visitas a médicos en consultas externas o ambulatorias, pero no las visitas realizadas en el hospital como paciente ingresado o atendido en un hospital de día. No deben incluirse las visitas al dentista, aunque sí al cirujano maxilofacial.”**

**50. ¿Cuándo fue la última vez que consultó a un especialista para usted @mismo/a?**

- En las últimas 4 semanas \_\_\_\_\_  1  
 Entre 4 semanas y 12 meses \_\_\_\_\_  2  
 Hace 12 meses o más \_\_\_\_\_  3  
 Nunca \_\_\_\_\_  4  
 No sabe \_\_\_\_\_  8  
 No contesta \_\_\_\_\_  9

Si P.50= 2 → Imputar P.51=00 e ir a Filtro P.53

Si P.50= 3, 4, 8, 9 → Ir a Filtro P.53

**51. Durante las últimas 4 semanas contando desde ayer, es decir, desde el \_\_\_\_\_ (fecha del día anterior a la entrevista menos 28 días), ¿cuántas veces consultó a un especialista para usted @mismo/a?**

|\_|\_| N° de veces      NS  98      NC  99

Si P.48=1 y P.50=1 → Ir a P.52

En otro caso → Ir a Filtro P.53

**52. El último médico que consultó, ¿era médico de familia/general o era especialista?**

- Médico de familia o médico general \_\_\_\_\_  1  
 Especialista \_\_\_\_\_  2  
 No sabe \_\_\_\_\_  8  
 No contesta \_\_\_\_\_  9

Si P.48=1 o P.50=1 → Ir a P.53

En otro caso → Ir a P.58

**53. ¿Dónde tuvo lugar la última consulta realizada durante las últimas 4 semanas?**

- Centro de Salud/Consultorio \_\_\_\_\_  01
- Ambulatorio/Centro de especialidades \_\_\_\_\_  02
- Consulta externa de un hospital \_\_\_\_\_  03
- Servicio de Urgencias no hospitalario \_\_\_\_\_  04
- Servicio de Urgencias de un hospital \_\_\_\_\_  05
- Consulta de médico de una sociedad \_\_\_\_\_  06
- Consulta de médico particular \_\_\_\_\_  07
- Empresa o lugar de trabajo \_\_\_\_\_  08
- Domicilio del entrevistado \_\_\_\_\_  09
- Consulta telefónica \_\_\_\_\_  10
- Otro lugar \_\_\_\_\_  11
- No sabe \_\_\_\_\_  98
- No contesta \_\_\_\_\_  99

Si P.53 = 04 ó 05 → Ir a P.57

**54. ¿Cuál fue el motivo principal de esta última consulta?**

- Diagnóstico de una enfermedad o problema de salud \_\_\_\_\_  1
- Un accidente o agresión \_\_\_\_\_  2
- Revisión \_\_\_\_\_  3
- Sólo dispensación de recetas \_\_\_\_\_  4
- Parte de baja, confirmación o alta \_\_\_\_\_  5
- Otros motivos \_\_\_\_\_  6
- No sabe \_\_\_\_\_  8
- No contesta \_\_\_\_\_  9

Si P.54 <> 1 → Ir a P.56

**55. Y esta última vez, ¿cuánto tiempo pasó desde que empezó a notarse @enfermo/a o sintió que tenía algún problema de salud hasta que pidió cita para consulta?**

- Meses \_\_\_\_\_
- Días \_\_\_\_\_
- Horas \_\_\_\_\_
- No sabe \_\_\_\_\_  98
- No contesta \_\_\_\_\_  99

Nota P.55: **Entrevistador/a**, puede rellenar las tres casillas (Meses, Días y Horas) o cualquiera de las tres casillas por separado.

**56. Y también esta última vez, ¿cuánto tiempo pasó desde que pidió la cita hasta que le vio el médico?**

Meses \_\_\_\_\_

Días \_\_\_\_\_

Horas \_\_\_\_\_

No sabe \_\_\_\_\_  98

No contesta \_\_\_\_\_  99

Nota P.56: **Entrevistador/a**, puede rellenar las tres casillas (Meses, Días y Horas) o cualquiera de las tres casillas por separado.

Si P.53 = 01 ó 02 → Ir a P.57. Disponibles todas las categorías de respuesta.

Si P.53 = 06 ó 07 → Disponibles en P.57 solo respuestas 2, 3, 8 y 9

Si P.53 = 08 → Marcar en P.57 = 4 e Ir a P.58

**57. El médico al que acudió en esta última consulta realizada era de:**

Sanidad Pública (Seguridad Social) \_\_\_\_\_  1

Sociedad médica \_\_\_\_\_  2

Consulta privada \_\_\_\_\_  3

Otros (médico de empresa, etc.) \_\_\_\_\_  4

No sabe \_\_\_\_\_  8

No contesta \_\_\_\_\_  9

**58. En los últimos 12 meses, es decir, desde \_\_\_\_\_ (fecha de entrevista menos un año), ¿ha visitado para usted @mismo/a un...?**

|                                        | Sí                           | No                           | No sabe                      | No contesta                  |
|----------------------------------------|------------------------------|------------------------------|------------------------------|------------------------------|
| Fisioterapeuta                         | <input type="checkbox"/> (1) | <input type="checkbox"/> (2) | <input type="checkbox"/> (8) | <input type="checkbox"/> (9) |
| Psicólogo, psicoterapeuta o psiquiatra | <input type="checkbox"/> (1) | <input type="checkbox"/> (2) | <input type="checkbox"/> (8) | <input type="checkbox"/> (9) |
| Enfermero/a o matrona                  | <input type="checkbox"/> (1) | <input type="checkbox"/> (2) | <input type="checkbox"/> (8) | <input type="checkbox"/> (9) |

**59. Durante los últimos 12 meses, es decir, desde \_\_\_\_\_ (fecha de entrevista menos un año), ¿se ha realizado algún análisis?**

- Sí \_\_\_\_\_  1  
 No \_\_\_\_\_  2  
 No sabe \_\_\_\_\_  8  
 No contesta \_\_\_\_\_  9

Nota P.59: **Entrevistador/a**, se incluye análisis de sangre, orina, heces, etc.

**60. Durante los últimos 12 meses, es decir, desde \_\_\_\_\_ (fecha de entrevista menos un año), ¿se ha realizado alguna de las siguientes pruebas?**

|                      | Sí                           | No                           | No sabe                      | No contesta                  |
|----------------------|------------------------------|------------------------------|------------------------------|------------------------------|
| Radiografía          | <input type="checkbox"/> (1) | <input type="checkbox"/> (2) | <input type="checkbox"/> (8) | <input type="checkbox"/> (9) |
| TAC o escáner        | <input type="checkbox"/> (1) | <input type="checkbox"/> (2) | <input type="checkbox"/> (8) | <input type="checkbox"/> (9) |
| Ecografía            | <input type="checkbox"/> (1) | <input type="checkbox"/> (2) | <input type="checkbox"/> (8) | <input type="checkbox"/> (9) |
| Resonancia magnética | <input type="checkbox"/> (1) | <input type="checkbox"/> (2) | <input type="checkbox"/> (8) | <input type="checkbox"/> (9) |

**60.a- Durante los últimos 12 meses, es decir, desde \_\_\_\_\_ (fecha de hace un año), ¿ha visitado para usted @mismo/a a un...?**

|                                                                        | Sí                         | No                         | No sabe                    | No contesta                |
|------------------------------------------------------------------------|----------------------------|----------------------------|----------------------------|----------------------------|
| Homeópata                                                              | <input type="checkbox"/> 1 | <input type="checkbox"/> 2 | <input type="checkbox"/> 8 | <input type="checkbox"/> 9 |
| Acupuntor                                                              | <input type="checkbox"/> 1 | <input type="checkbox"/> 2 | <input type="checkbox"/> 8 | <input type="checkbox"/> 9 |
| Naturista                                                              | <input type="checkbox"/> 1 | <input type="checkbox"/> 2 | <input type="checkbox"/> 8 | <input type="checkbox"/> 9 |
| Otro profesional de medicina alternativa (osteópata, quiropráctico...) | <input type="checkbox"/> 1 | <input type="checkbox"/> 2 | <input type="checkbox"/> 8 | <input type="checkbox"/> 9 |

**61. Durante los últimos 12 meses, es decir, desde \_\_\_\_\_ (fecha de entrevista menos un año), ¿ha utilizado personalmente alguno de los siguientes servicios asistenciales?**

|                                                                                                                                   | Sí                           | No                           | No sabe                      | No contesta                  |
|-----------------------------------------------------------------------------------------------------------------------------------|------------------------------|------------------------------|------------------------------|------------------------------|
| Atención domiciliaria por una enfermera o matrona                                                                                 | <input type="checkbox"/> (1) | <input type="checkbox"/> (2) | <input type="checkbox"/> (8) | <input type="checkbox"/> (9) |
| Ayuda domiciliaria para las tareas domésticas o para las personas mayores                                                         | <input type="checkbox"/> (1) | <input type="checkbox"/> (2) | <input type="checkbox"/> (8) | <input type="checkbox"/> (9) |
| Comidas a domicilio para personas mayores                                                                                         | <input type="checkbox"/> (1) | <input type="checkbox"/> (2) | <input type="checkbox"/> (8) | <input type="checkbox"/> (9) |
| Servicios especiales de transporte a domicilio para acudir a un servicio médico, a un hospital de día, actividades recreativas... | <input type="checkbox"/> (1) | <input type="checkbox"/> (2) | <input type="checkbox"/> (8) | <input type="checkbox"/> (9) |
| Otros servicios de asistencia domiciliaria                                                                                        | <input type="checkbox"/> (1) | <input type="checkbox"/> (2) | <input type="checkbox"/> (8) | <input type="checkbox"/> (9) |

La tercera opción: “Comidas a domicilio para personas mayores” solo aparece si la persona adulta seleccionada es mayor de 65 años.

**Introducción P.62:** Entrevistador/a, léale al informante: “A continuación voy a hacerle unas preguntas sobre su salud dental.”

**62. ¿Cuándo fue la última vez que visitó al dentista, estomatólogo o higienista dental para usted @mismo/a (es decir, no sólo como acompañante de un niño, de su pareja, etc.)?**

Hace 3 meses o menos \_\_\_\_\_  1

Hace más de 3 meses y menos de 6 \_\_\_\_\_  2

Hace 6 meses o más pero menos de 12 \_\_\_\_\_  2

Hace 12 meses o más \_\_\_\_\_  4

Nunca \_\_\_\_\_  5

62.b ¿Cuántas veces en los últimos 3 meses?  
   NS  98 NC  99

Si P.62= 5 → Ir a P.65

**63. La última vez que acudió, ¿cuál o cuáles de los siguientes tipos de asistencia recibió?**

|                                               | Sí                           | No                           | No sabe                      | No contesta                  |
|-----------------------------------------------|------------------------------|------------------------------|------------------------------|------------------------------|
| Revisión o chequeo                            | <input type="checkbox"/> (1) | <input type="checkbox"/> (2) | <input type="checkbox"/> (8) | <input type="checkbox"/> (9) |
| Limpieza de boca                              | <input type="checkbox"/> (1) | <input type="checkbox"/> (2) | <input type="checkbox"/> (8) | <input type="checkbox"/> (9) |
| Empastes (obturaciones), endodoncias          | <input type="checkbox"/> (1) | <input type="checkbox"/> (2) | <input type="checkbox"/> (8) | <input type="checkbox"/> (9) |
| Extracción de algún diente/muela              | <input type="checkbox"/> (1) | <input type="checkbox"/> (2) | <input type="checkbox"/> (8) | <input type="checkbox"/> (9) |
| Fundas, puentes u otro tipo de prótesis       | <input type="checkbox"/> (1) | <input type="checkbox"/> (2) | <input type="checkbox"/> (8) | <input type="checkbox"/> (9) |
| Tratamiento de las enfermedades de las encías | <input type="checkbox"/> (1) | <input type="checkbox"/> (2) | <input type="checkbox"/> (8) | <input type="checkbox"/> (9) |
| Ortodoncia                                    | <input type="checkbox"/> (1) | <input type="checkbox"/> (2) | <input type="checkbox"/> (8) | <input type="checkbox"/> (9) |
| Aplicación de flúor                           | <input type="checkbox"/> (1) | <input type="checkbox"/> (2) | <input type="checkbox"/> (8) | <input type="checkbox"/> (9) |
| Implantes                                     | <input type="checkbox"/> (1) | <input type="checkbox"/> (2) | <input type="checkbox"/> (8) | <input type="checkbox"/> (9) |
| Otro tipo de asistencia                       | <input type="checkbox"/> (1) | <input type="checkbox"/> (2) | <input type="checkbox"/> (8) | <input type="checkbox"/> (9) |

**64. El dentista, estomatólogo o higienista dental al que consultó esta última vez era de:**

- Sanidad Pública (Seguridad Social, ayuntamiento, consulta privada financiada por el gobierno autónomo) \_\_\_\_\_  1
- Sociedad médica \_\_\_\_\_  2
- Consulta privada \_\_\_\_\_  3
- Otros \_\_\_\_\_  4
- No sabe \_\_\_\_\_  8
- No contesta \_\_\_\_\_  9

**65. ¿Cuál es el estado de sus dientes y muelas?**

|                                                                            | Sí                           | No                           | No sabe                      | No contesta                  |
|----------------------------------------------------------------------------|------------------------------|------------------------------|------------------------------|------------------------------|
| Tiene caries                                                               | <input type="checkbox"/> (1) | <input type="checkbox"/> (2) | <input type="checkbox"/> (8) | <input type="checkbox"/> (9) |
| Le han extraído dientes/muelas                                             | <input type="checkbox"/> (1) | <input type="checkbox"/> (2) | <input type="checkbox"/> (8) | <input type="checkbox"/> (9) |
| Tiene dientes/muelas empastados (obturados)                                | <input type="checkbox"/> (1) | <input type="checkbox"/> (2) | <input type="checkbox"/> (8) | <input type="checkbox"/> (9) |
| Le sangran las encías al cepillarse o espontáneamente                      | <input type="checkbox"/> (1) | <input type="checkbox"/> (2) | <input type="checkbox"/> (8) | <input type="checkbox"/> (9) |
| Se le mueven los dientes/muelas                                            | <input type="checkbox"/> (1) | <input type="checkbox"/> (2) | <input type="checkbox"/> (8) | <input type="checkbox"/> (9) |
| Lleva fundas (coronas), puentes, otro tipo de prótesis o dentadura postiza | <input type="checkbox"/> (1) | <input type="checkbox"/> (2) | <input type="checkbox"/> (8) | <input type="checkbox"/> (9) |
| Le faltan dientes/muelas que no han sido sustituidos por prótesis          | <input type="checkbox"/> (1) | <input type="checkbox"/> (2) | <input type="checkbox"/> (8) | <input type="checkbox"/> (9) |
| Tiene o conserva todos sus dientes/muelas naturales                        | <input type="checkbox"/> (1) | <input type="checkbox"/> (2) | <input type="checkbox"/> (8) | <input type="checkbox"/> (9) |

## O.- HOSPITALIZACIONES, URGENCIAS Y SEGURO SANITARIO

**Introducción P.66:** Entrevistador/a, léale al informante: “El siguiente grupo de preguntas hace referencia al tiempo pasado en un hospital. Se incluyen todos los tipos de hospital”.

Si la persona seleccionada es: (hombre) o (mujer de 52 años o más), mostrar P66.a  
 Si la persona seleccionada es mujer menor de 52 años, mostrar P66.b

**66a. Durante los últimos 12 meses, ¿ha tenido que ingresar como paciente al menos durante una noche?**

**66b. Durante los últimos 12 meses, ¿ha tenido que ingresar como paciente al menos durante una noche excluyendo partos o cesáreas?**

Sí \_\_\_\_\_  1  
 No \_\_\_\_\_  2

**Nota P.66:** Entrevistador/a, no deben incluirse las visitas a urgencias ni a hospitales de día. Para mujeres menores de 52 años sí se consideran los ingresos por complicaciones anteriores y posteriores al parto.

Si P.66 = 1 → Ir a P.67

Si P.66 = 2 y es una mujer menor de 52 años → Ir a P.69

Resto de los casos → Ir a P.75

Si la persona seleccionada es: (hombre) o (mujer de 52 años o más), mostrar P67.a

Si la persona seleccionada es mujer menor de 52 años, mostrar P67.b

**67a. ¿Cuántas veces ha estado @hospitalizado/a en estos últimos 12 meses?**

**67b. ¿Cuántas veces ha estado hospitalizada en estos últimos 12 meses? Nuevamente, no considere los partos o cesáreas.**

Nº de veces     **NS**  98 **NC**  99

\*Nota P.67: **Entrevistador/a:** anote 00 si el adulto seleccionado está actualmente hospitalizado en el momento de la entrevista (responde un proxy) y ésta es la única vez que ha estado hospitalizado en los últimos 12 meses.

Si la persona seleccionada es mujer menor de 52 años ---> Ir a P.69

Si la persona seleccionada es (hombre) o (mujer de 52 años o más) --> Ir a FILTRO P.70

**69. Durante los últimos 12 meses, ¿ha tenido que ingresar en un hospital por parto o cesárea?**

- Sí \_\_\_\_\_  1  
 No \_\_\_\_\_  2  
 No sabe \_\_\_\_\_  8  
 No contesta \_\_\_\_\_  9

Nota P.69: No deben incluirse las visitas a urgencias ni a hospitales de día.

FILTRO P.70

Si P.69= 2, 8, 9 y P.66 = 2 → Ir a P.75

Si P.69= blanco, 2, 8, 9 y P.67 = 1 → Ir a P.70

**70. En relación al último ingreso hospitalario que haya tenido por cualquier motivo, ¿cuántos días estuvo @ingresado/a en el hospital?**

Nº de días       **NS**  998 **NC**  999

\*Nota P.70: **Entrevistador/a:** anote 000 si el adulto seleccionado está actualmente





**Hospital de día**

**75. Durante los últimos 12 meses, desde el \_\_\_\_\_ (fecha de entrevista menos un año), ¿ha sido @atendido/a en un Hospital de día para una intervención, tratamiento o hacerse alguna prueba, es decir, permaneciendo durante todo o parte del día pero sin tener que pasar allí la noche?  
(Incluya ingresos en cama o sillón cama, no incluya estancias en urgencias ni en observación)**

- Sí \_\_\_\_\_  1  
 No \_\_\_\_\_  2  
 No sabe \_\_\_\_\_  8  
 No contesta \_\_\_\_\_  9

Si P.75 <>1 → Ir a P.78

**76. ¿Cuántos días ha tenido que acudir a un hospital de día, sin tener que pasar la noche?**

\_\_\_\_ Días      NS  998    NC  999

**Nota P.76:** Mínimo un día

Obligatorio: P.76 ≥ 001

**77. ¿Cual fue la razón del último ingreso que haya tenido en el Hospital de día?**

- Un tratamiento \_\_\_\_\_  1  
 Una intervención quirúrgica \_\_\_\_\_  2  
 Otros motivos \_\_\_\_\_  3  
 No sabe \_\_\_\_\_  8  
 No contesta \_\_\_\_\_  9

**Servicios de urgencia**

**Introducción P.78:** Entrevistador/a, léale al informante: “Para terminar este apartado, voy a preguntarle ahora por su posible utilización de los servicios de urgencias”.

**78. En estos últimos 12 meses, ¿ha tenido que utilizar algún servicio de urgencias por algún problema o enfermedad?**

Sí \_\_\_\_\_  1  
 No \_\_\_\_\_  2

Si P.78= 2 → Ir a P.84

**79. Y en total, ¿cuántas veces tuvo que utilizar un servicio de urgencias en estos 12 meses?**

Nº de veces                            **NS**  998    **NC**  999

**80. ¿Dónde fue @atendido/a la última vez?**

Nota P.80: se admite respuesta múltiple.

En el lugar donde se encontraba (domicilio, lugar de trabajo, etc.) \_\_\_\_\_   
 En una unidad móvil \_\_\_\_\_   
 En un centro o servicio de urgencias \_\_\_\_\_   
 No sabe \_\_\_\_\_   
 No contesta \_\_\_\_\_

**81. La última vez que utilizó un servicio de urgencias, ¿cuánto tiempo pasó desde que empezó a notarse @enfermo/a o sintió que tenía algún problema de salud hasta que pidió asistencia?**

Nota P.81: Entrevistador/a, puede rellenar las tres casillas (Días, Horas y Minutos) o cualquiera de las tres casillas por separado.

Días \_\_\_\_\_    
 Horas \_\_\_\_\_    
 Minutos \_\_\_\_\_    
 No sabe \_\_\_\_\_  98  
 No contesta \_\_\_\_\_  99

**82. Y también esta última vez que utilizó un servicio de urgencias, ¿cuánto tiempo pasó desde que pidió asistencia hasta que fue @atendido/a?**

Nota P.82: **Entrevistador/a**, puede rellenar las dos casillas (Minutos y Horas) o cualquiera de las dos casillas por separado.

Horas \_\_\_\_\_   
 Minutos \_\_\_\_\_   
 No sabe \_\_\_\_\_  98  
 No contesta \_\_\_\_\_  99

**83. Y también esta última vez que utilizó un servicio de urgencias en estos 12 últimos meses, ¿qué tipo de servicio utilizó?**

Hospital de la Sanidad Pública (Seguridad Social) \_\_\_\_\_  1  
 Centro o servicio de urgencias no hospitalario de la Sanidad Pública (Seguridad Social). Por ejemplo, centro de salud, ambulatorio etc. \_\_\_\_\_  2  
 Sanatorio, hospital o clínica privada \_\_\_\_\_  3  
 Servicio privado de urgencias \_\_\_\_\_  4  
 Casa de socorro o servicio de urgencias del ayuntamiento \_\_\_\_\_  5  
 Otro tipo de servicio \_\_\_\_\_  6  
 No sabe \_\_\_\_\_  8  
 No contesta \_\_\_\_\_  9

**84. ¿Podría decirme ahora, de cuál o cuáles de las siguientes modalidades de Seguro Sanitario (público y/o privado) es titular o @beneficiario/a?**

Sanidad pública (Seguridad Social) \_\_\_\_\_   
 Mutualidades del Estado (MUFACE, ISFAS, MUGEJU) acogidas a la Seguridad Social \_\_\_\_\_   
 Mutualidades del Estado (MUFACE, ISFAS, MUGEJU) acogidas a un seguro privado \_\_\_\_\_   
 Seguro médico privado, concertado individualmente (sociedades médicas, Colegios Profesionales, etc.) \_\_\_\_\_   
 Seguro médico concertado por la empresa \_\_\_\_\_   
 No tengo seguro médico \_\_\_\_\_   
 Otras situaciones \_\_\_\_\_   
 No sabe \_\_\_\_\_   
 No contesta \_\_\_\_\_

Nota P.84: **Entrevistador/a**, anote como máximo dos respuestas, las que el informante considere prioritarias.

## P.- CONSUMO DE MEDICAMENTOS

**Introducción P.85:** Entrevistador/a, léale al informante: “A continuación, le voy a preguntar sobre el consumo de medicamentos en las últimas 2 semanas.”

**85. Durante las 2 últimas semanas, ¿ha consumido algún medicamento que le fuera recetado por un médico?**

Sí \_\_\_\_\_  1  
 No \_\_\_\_\_  2

**86. Durante las últimas 2 semanas, ¿ha consumido algún medicamento, incluyendo medicamentos a base de plantas o vitaminas, que no le fueran recetados por un médico?**

Sí \_\_\_\_\_  1  
 No \_\_\_\_\_  2  
 No sabe \_\_\_\_\_  8  
 No contesta \_\_\_\_\_  9

Si P.85=1 o P.86=1 → Ir a P.87

En otro caso → Ir a P.88

**87. A continuación voy a leerle una lista de tipos de medicamentos, por favor dígame ¿cuál o cuáles de ellos ha consumido en las últimas 2 semanas y cuáles le fueron recetados por el médico?**

Nota P.87: Entrevistador/a, léale al informante la lista de medicamentos y pregúntele, para cada uno de ellos, si los ha consumido o no en las últimas 2 semanas y, en caso afirmativo, si le fueron o no recetados por algún médico. Para cada medicamento que haya consumido debe cumplimentar la columna **Recetado**.

|                                                                | Consumido                    |                              |                              |                              | Recetado                     |                              |                              |                              |
|----------------------------------------------------------------|------------------------------|------------------------------|------------------------------|------------------------------|------------------------------|------------------------------|------------------------------|------------------------------|
|                                                                | Sí                           | No                           | NS                           | NC                           | Sí                           | No                           | NS                           | NC                           |
| 1. Medicinas para el catarro, gripe, garganta, bronquios       | <input type="checkbox"/> (1) | <input type="checkbox"/> (2) | <input type="checkbox"/> (8) | <input type="checkbox"/> (9) | <input type="checkbox"/> (1) | <input type="checkbox"/> (2) | <input type="checkbox"/> (8) | <input type="checkbox"/> (9) |
| 2. Medicinas para el dolor                                     | <input type="checkbox"/> (1) | <input type="checkbox"/> (2) | <input type="checkbox"/> (8) | <input type="checkbox"/> (9) | <input type="checkbox"/> (1) | <input type="checkbox"/> (2) | <input type="checkbox"/> (8) | <input type="checkbox"/> (9) |
| 3. Medicinas para bajar la fiebre                              | <input type="checkbox"/> (1) | <input type="checkbox"/> (2) | <input type="checkbox"/> (8) | <input type="checkbox"/> (9) | <input type="checkbox"/> (1) | <input type="checkbox"/> (2) | <input type="checkbox"/> (8) | <input type="checkbox"/> (9) |
| 4. Reconstituyentes como vitaminas, minerales, tónicos         | <input type="checkbox"/> (1) | <input type="checkbox"/> (2) | <input type="checkbox"/> (8) | <input type="checkbox"/> (9) | <input type="checkbox"/> (1) | <input type="checkbox"/> (2) | <input type="checkbox"/> (8) | <input type="checkbox"/> (9) |
| 5. Laxantes                                                    | <input type="checkbox"/> (1) | <input type="checkbox"/> (2) | <input type="checkbox"/> (8) | <input type="checkbox"/> (9) | <input type="checkbox"/> (1) | <input type="checkbox"/> (2) | <input type="checkbox"/> (8) | <input type="checkbox"/> (9) |
| 6. Antibióticos                                                | <input type="checkbox"/> (1) | <input type="checkbox"/> (2) | <input type="checkbox"/> (8) | <input type="checkbox"/> (9) | <input type="checkbox"/> (1) | <input type="checkbox"/> (2) | <input type="checkbox"/> (8) | <input type="checkbox"/> (9) |
| 7. Tranquilizantes, relajantes, pastillas para dormir          | <input type="checkbox"/> (1) | <input type="checkbox"/> (2) | <input type="checkbox"/> (8) | <input type="checkbox"/> (9) | <input type="checkbox"/> (1) | <input type="checkbox"/> (2) | <input type="checkbox"/> (8) | <input type="checkbox"/> (9) |
| 8. Medicamentos para la alergia                                | <input type="checkbox"/> (1) | <input type="checkbox"/> (2) | <input type="checkbox"/> (8) | <input type="checkbox"/> (9) | <input type="checkbox"/> (1) | <input type="checkbox"/> (2) | <input type="checkbox"/> (8) | <input type="checkbox"/> (9) |
| 9. Medicamentos para la diarrea                                | <input type="checkbox"/> (1) | <input type="checkbox"/> (2) | <input type="checkbox"/> (8) | <input type="checkbox"/> (9) | <input type="checkbox"/> (1) | <input type="checkbox"/> (2) | <input type="checkbox"/> (8) | <input type="checkbox"/> (9) |
| 10. Medicinas para el reuma                                    | <input type="checkbox"/> (1) | <input type="checkbox"/> (2) | <input type="checkbox"/> (8) | <input type="checkbox"/> (9) | <input type="checkbox"/> (1) | <input type="checkbox"/> (2) | <input type="checkbox"/> (8) | <input type="checkbox"/> (9) |
| 11. Medicinas para el corazón                                  | <input type="checkbox"/> (1) | <input type="checkbox"/> (2) | <input type="checkbox"/> (8) | <input type="checkbox"/> (9) | <input type="checkbox"/> (1) | <input type="checkbox"/> (2) | <input type="checkbox"/> (8) | <input type="checkbox"/> (9) |
| 12. Medicinas para la tensión arterial                         | <input type="checkbox"/> (1) | <input type="checkbox"/> (2) | <input type="checkbox"/> (8) | <input type="checkbox"/> (9) | <input type="checkbox"/> (1) | <input type="checkbox"/> (2) | <input type="checkbox"/> (8) | <input type="checkbox"/> (9) |
| 13. Medicinas para el estómago y/o las alteraciones digestivas | <input type="checkbox"/> (1) | <input type="checkbox"/> (2) | <input type="checkbox"/> (8) | <input type="checkbox"/> (9) | <input type="checkbox"/> (1) | <input type="checkbox"/> (2) | <input type="checkbox"/> (8) | <input type="checkbox"/> (9) |
| 14. Antidepresivos, estimulantes                               | <input type="checkbox"/> (1) | <input type="checkbox"/> (2) | <input type="checkbox"/> (8) | <input type="checkbox"/> (9) | <input type="checkbox"/> (1) | <input type="checkbox"/> (2) | <input type="checkbox"/> (8) | <input type="checkbox"/> (9) |
| 15. Píldoras para no quedar embarazada (solo para mujeres)     | <input type="checkbox"/> (1) | <input type="checkbox"/> (2) | <input type="checkbox"/> (8) | <input type="checkbox"/> (9) | <input type="checkbox"/> (1) | <input type="checkbox"/> (2) | <input type="checkbox"/> (8) | <input type="checkbox"/> (9) |
| 16. Hormonas para la menopausia (solo para mujeres)            | <input type="checkbox"/> (1) | <input type="checkbox"/> (2) | <input type="checkbox"/> (8) | <input type="checkbox"/> (9) | <input type="checkbox"/> (1) | <input type="checkbox"/> (2) | <input type="checkbox"/> (8) | <input type="checkbox"/> (9) |
| 17. Medicamentos para adelgazar                                | <input type="checkbox"/> (1) | <input type="checkbox"/> (2) | <input type="checkbox"/> (8) | <input type="checkbox"/> (9) | <input type="checkbox"/> (1) | <input type="checkbox"/> (2) | <input type="checkbox"/> (8) | <input type="checkbox"/> (9) |
| 18. Medicamentos para bajar el colesterol                      | <input type="checkbox"/> (1) | <input type="checkbox"/> (2) | <input type="checkbox"/> (8) | <input type="checkbox"/> (9) | <input type="checkbox"/> (1) | <input type="checkbox"/> (2) | <input type="checkbox"/> (8) | <input type="checkbox"/> (9) |
| 19. Medicamentos para la diabetes                              | <input type="checkbox"/> (1) | <input type="checkbox"/> (2) | <input type="checkbox"/> (8) | <input type="checkbox"/> (9) | <input type="checkbox"/> (1) | <input type="checkbox"/> (2) | <input type="checkbox"/> (8) | <input type="checkbox"/> (9) |
| 20. Medicamentos para el tiroides                              | <input type="checkbox"/> (1) | <input type="checkbox"/> (2) | <input type="checkbox"/> (8) | <input type="checkbox"/> (9) | <input type="checkbox"/> (1) | <input type="checkbox"/> (2) | <input type="checkbox"/> (8) | <input type="checkbox"/> (9) |
| 21. Productos homeopáticos                                     | <input type="checkbox"/> (1) | <input type="checkbox"/> (2) | <input type="checkbox"/> (8) | <input type="checkbox"/> (9) | <input type="checkbox"/> (1) | <input type="checkbox"/> (2) | <input type="checkbox"/> (8) | <input type="checkbox"/> (9) |
| 22. Productos naturistas                                       | <input type="checkbox"/> (1) | <input type="checkbox"/> (2) | <input type="checkbox"/> (8) | <input type="checkbox"/> (9) | <input type="checkbox"/> (1) | <input type="checkbox"/> (2) | <input type="checkbox"/> (8) | <input type="checkbox"/> (9) |
| 23. Otros medicamentos                                         | <input type="checkbox"/> (1) | <input type="checkbox"/> (2) | <input type="checkbox"/> (8) | <input type="checkbox"/> (9) | <input type="checkbox"/> (1) | <input type="checkbox"/> (2) | <input type="checkbox"/> (8) | <input type="checkbox"/> (9) |

Sólo se activará la correspondiente P.87\_Recetado para las opciones en las que P.87\_Consumido = 1

Si el adulto seleccionado es hombre, NO aparecerán las opciones 15 y 16.

Si el adulto seleccionado es mujer de 65 años o más, NO aparecerá la opción 15.

### Q.- PRÁCTICAS PREVENTIVAS

Introducción P.88: Entrevistador/a, léale al informante: “A continuación, le voy a preguntar sobre la vacunación de la gripe.”

88. ¿Se ha vacunado de la gripe en la última campaña?

Sí \_\_\_\_\_  1  
 No \_\_\_\_\_  2

Si P.88 = 2 → Ir a Introducción P.89

**88b. ¿Cuándo se vacunó?**

Año \_\_\_\_\_ [ ][ ][ ][ ][ ]  
 Mes \_\_\_\_\_ [ ][ ]

**Introducción P.89:** Entrevistador/a, léale al informante: “Ahora le voy a preguntar sobre su tensión arterial, su nivel de colesterol y su nivel de azúcar”.

**89. ¿Le ha tomado la tensión alguna vez un profesional sanitario?**

- Sí \_\_\_\_\_  1  
 No \_\_\_\_\_  2  
 No sabe \_\_\_\_\_  8  
 No contesta \_\_\_\_\_  9

Nota P.89: Entrevistador/a, se incluye la toma de tensión en farmacias.

Si P.89= 2, 8, 9 → Ir a P.91

**90. La última vez que le tomaron la tensión fue:**

- En los últimos 12 meses \_\_\_\_\_  1  
 Hace 1 año o más pero menos de 2 años \_\_\_\_\_  2  
 Hace 2 años o más pero menos de 3 años \_\_\_\_\_  3  
 Hace 3 años o más pero menos de 5 años \_\_\_\_\_  4  
 Hace 5 años o más \_\_\_\_\_  5  
 No sabe \_\_\_\_\_  8  
 No contesta \_\_\_\_\_  9

Nota P.90: Entrevistador/a, se incluye la toma de tensión en farmacias.

**91. ¿Le han medido alguna vez su nivel de colesterol en sangre?**

- Sí \_\_\_\_\_  1  
 No \_\_\_\_\_  2  
 No sabe \_\_\_\_\_  8  
 No contesta \_\_\_\_\_  9

Si P.91 = 2, 8, 9 → Ir a P.93

**92. ¿Cuándo fue la última vez que le midieron su nivel de colesterol en sangre?**

- En los últimos 12 meses \_\_\_\_\_  1
- Hace 1 año o más pero menos de 3 años \_\_\_\_\_  2
- Hace 3 años o más pero menos de 5 años \_\_\_\_\_  3
- Hace 5 años o más \_\_\_\_\_  4
- No sabe \_\_\_\_\_  8
- No contesta \_\_\_\_\_  9

**93. ¿Le ha medido alguna vez su nivel de azúcar en sangre un profesional sanitario?**

- Sí \_\_\_\_\_  1
- No \_\_\_\_\_  2
- No sabe \_\_\_\_\_  8
- No contesta \_\_\_\_\_  9

Si P.93 = 2, 8, 9 → Ir a Introducción P.95

**94. ¿Cuándo fue la última vez que un profesional sanitario le midió su nivel de azúcar en sangre?**

- En los últimos 12 meses \_\_\_\_\_  1
- Hace 1 año o más pero menos de 3 años \_\_\_\_\_  2
- Hace 3 años o más pero menos de 5 años \_\_\_\_\_  3
- Hace 5 años o más \_\_\_\_\_  4
- No sabe \_\_\_\_\_  8
- No contesta \_\_\_\_\_  9

**Introducción P.95:** Entrevistador/a, léale al informante: “Las siguientes preguntas hacen referencia a la prueba de sangre oculta en heces y a la colonoscopia.”

**95. ¿Alguna vez le han hecho una prueba de sangre oculta en heces?**

- Sí \_\_\_\_\_  1
- No \_\_\_\_\_  2
- No sabe \_\_\_\_\_  8
- No contesta \_\_\_\_\_  9



Si P.95 = 2, 8, 9 → Ir a P.98

**96. ¿Cuándo fue la última vez que le hicieron una prueba de sangre oculta en heces?**

- En los últimos 12 meses \_\_\_\_\_  1
- Hace 1 año o más pero menos de 2 años \_\_\_\_\_  2
- Hace 2 años o más pero menos de 3 años \_\_\_\_\_  3
- Hace 3 años o más pero menos de 5 años \_\_\_\_\_  4
- Hace 5 años o más \_\_\_\_\_  5
- No sabe \_\_\_\_\_  8
- No contesta \_\_\_\_\_  9

**97. ¿Cuál de las siguientes fue la principal razón por la que se hizo esta última prueba de sangre oculta en heces?**

- Por algún problema, síntoma o enfermedad \_\_\_\_\_  1
- Por consejo de su médico de atención primaria o especialista, aunque no tenía ningún problema \_\_\_\_\_  2
- Porque recibió una carta, le llamaron por teléfono o le dijeron en su centro de salud que si se quería hacer esta prueba \_\_\_\_\_  3
- Otras razones \_\_\_\_\_  4
- No sabe \_\_\_\_\_  8
- No contesta \_\_\_\_\_  9

**98. ¿Le han realizado alguna vez una colonoscopia?**

- Sí \_\_\_\_\_  1
- No \_\_\_\_\_  2
- No sabe \_\_\_\_\_  8
- No contesta \_\_\_\_\_  9

Nota P.98: **Entrevistador/a**, si el informante tiene dudas sobre qué es una colonoscopia, puede comentarle que se trata de una: “Exploración del interior del colon a través de un aparato óptico”.

Si P.98 = 2, 8, 9 y el adulto seleccionado es mujer → Ir a Introducción P.100

Si P.98 = 2, 8, 9 y el adulto seleccionado es hombre → Ir a Introducción P.106

**99. ¿Cuándo fue la última vez que le hicieron una colonoscopia?**

- En los últimos 12 meses \_\_\_\_\_ 1
- Hace 1 año o más pero menos de 5 años \_\_\_\_\_ 2
- Hace 5 años o más pero menos de 10 años \_\_\_\_\_ 3
- Hace 10 años o más \_\_\_\_\_ 4
- No sabe \_\_\_\_\_ 8
- No contesta \_\_\_\_\_ 9

Nota P.99: **Entrevistador/a**, si el informante tiene dudas sobre qué es una colonoscopia, puede comentarle que se trata de una: “Exploración del interior del colon a través de un aparato óptico”.

Si el adulto seleccionado es mujer → Ir a Introducción P.100

Si el adulto seleccionado es hombre → Ir a Introducción P.106

**Introducción P.100:** **Entrevistador/a**, léale al informante: “Las siguientes preguntas hacen referencia a las pruebas de mamografía y de citología vaginal”.

**100. ¿Le han hecho alguna vez una mamografía?**

- Sí \_\_\_\_\_  1
- No \_\_\_\_\_  2
- No sabe \_\_\_\_\_  8
- No contesta \_\_\_\_\_  9

Nota P.100: **Entrevistador/a**, si la informante tiene dudas sobre la mamografía puede comentarle que se trata de una radiografía de mama.

Si P.100 = 2, 8, 9 → Ir a P.103

**101. ¿Cuándo fue la última vez que le hicieron una mamografía?**

- En los últimos 12 meses \_\_\_\_\_  1
- Hace 1 año o más pero menos de 2 años \_\_\_\_\_  2
- Hace 2 años o más pero menos de 3 años \_\_\_\_\_  3
- Hace 3 años o más \_\_\_\_\_  4
- No sabe \_\_\_\_\_  8
- No contesta \_\_\_\_\_  9

Nota P.101: **Entrevistador/a**, si la informante tiene dudas sobre la mamografía puede comentarle que se trata de una radiografía de mama.

**102. ¿Cuál de las siguientes fue la principal razón por la que se hizo esta última mamografía?**

- Por algún problema, síntoma o enfermedad \_\_\_\_\_  1
- Por consejo de su médico de atención primaria o especialista, aunque no tenía ningún problema \_\_\_\_\_  2
- Porque recibió una carta, le llamaron por teléfono o le dijeron en su centro de salud que si se quería hacer esta prueba \_\_\_\_\_  3
- Otras razones \_\_\_\_\_  4
- No sabe \_\_\_\_\_  8
- No contesta \_\_\_\_\_  9

**103. ¿Le han hecho alguna vez una citología vaginal?**

- Sí \_\_\_\_\_  1
- No \_\_\_\_\_  2
- No sabe \_\_\_\_\_  8
- No contesta \_\_\_\_\_  9

Nota P.103: **Entrevistador/a**, si la informante tiene dudas sobre la citología vaginal, puede comentarle que se trata de una muestra de células.

Si P.103 = 2, 8, 9 → Ir a Introducción P.106

**104. ¿Cuándo fue la última vez que le hicieron una citología vaginal?**

- En los últimos 12 meses \_\_\_\_\_ 1
- Hace 1 año o más pero menos de 2 años \_\_\_\_\_ 2
- Hace 2 años o más pero menos de 3 años \_\_\_\_\_ 3
- Hace 3 años o más pero menos de 5 años \_\_\_\_\_ 4
- Hace 5 años o más \_\_\_\_\_ 5
- No sabe \_\_\_\_\_ 8
- No contesta \_\_\_\_\_ 9

Nota P.104: **Entrevistador/a**, si la informante tiene dudas sobre la citología vaginal, puede comentarle que se trata de una muestra de células.

**105. ¿Cuál de las siguientes fue la principal razón por la que se hizo esta última citología?**

- Por algún problema, síntoma o enfermedad \_\_\_\_\_  1
- Por consejo de su médico de atención primaria o especialista, aunque no tenía ningún problema \_\_\_\_\_  2
- Porque recibió una carta, le llamaron por teléfono o le dijeron en su centro de salud que si se quería hacer esta prueba \_\_\_\_\_  3
- Otras razones \_\_\_\_\_  4
- No sabe \_\_\_\_\_  8
- No contesta \_\_\_\_\_  9

**R.- NECESIDADES DE ATENCIÓN MÉDICA NO CUBIERTAS**

**Introducción P.106:** **Entrevistador/a**, léale al informante: “Por diferentes motivos puede tener que esperar para recibir atención médica e incluso puede no llegar a recibirla.”

**106. En los últimos 12 meses, ¿alguna vez ha tardado demasiado en recibir asistencia médica por una lista de espera demasiado larga?**

- Sí \_\_\_\_\_  1
- No \_\_\_\_\_  2
- No he necesitado asistencia médica \_\_\_\_\_  3
- No sabe \_\_\_\_\_  8
- No contesta \_\_\_\_\_  9

Nota P.106: **Entrevistador/a**, si la respuesta es NO, se debe indagar si se refiere a la categoría 2 (Necesité atención médica y la recibí o tardé en recibirla pero no por ese motivo) o a la categoría 3 (No necesité atención médica).

**107. En los últimos 12 meses, ¿alguna vez ha tardado demasiado en recibir o ha carecido de asistencia médica por dificultades relacionadas con el transporte o la distancia?**

- Sí \_\_\_\_\_  1
- No \_\_\_\_\_  2
- No he necesitado asistencia médica \_\_\_\_\_  3
- No sabe \_\_\_\_\_  8
- No contesta \_\_\_\_\_  9

Nota P.107: **Entrevistador/a**, si la respuesta es NO, se debe indagar si se refiere a la categoría 2 (Necesité atención médica y tardé en recibirla pero no por ese motivo o necesité atención sanitaria y la he recibido) o a la categoría 3 (No necesité atención médica).

**108. En los últimos 12 meses, ¿ha necesitado alguno de los siguientes tipos de atención sanitaria y no se lo pudo permitir por motivos económicos?**

|                                                                               | Sí                           | No                           | No lo he necesitado          | No sabe                      | No contesta                  |
|-------------------------------------------------------------------------------|------------------------------|------------------------------|------------------------------|------------------------------|------------------------------|
| A. Atención médica                                                            | <input type="checkbox"/> (1) | <input type="checkbox"/> (2) | <input type="checkbox"/> (3) | <input type="checkbox"/> (8) | <input type="checkbox"/> (9) |
| B. Atención dental                                                            | <input type="checkbox"/> (1) | <input type="checkbox"/> (2) | <input type="checkbox"/> (3) | <input type="checkbox"/> (8) | <input type="checkbox"/> (9) |
| C. Algún medicamento que le habían recetado                                   | <input type="checkbox"/> (1) | <input type="checkbox"/> (2) | <input type="checkbox"/> (3) | <input type="checkbox"/> (8) | <input type="checkbox"/> (9) |
| D. Atención de salud mental (Consulta al psicólogo o psiquiatra, por ejemplo) | <input type="checkbox"/> (1) | <input type="checkbox"/> (2) | <input type="checkbox"/> (3) | <input type="checkbox"/> (8) | <input type="checkbox"/> (9) |

Nota P.108: **Entrevistador/a**, si la respuesta es NO, se debe indagar si se refiere a la categoría 2 (Necesité atención sanitaria pero no pude permitírmela por motivos económicos o necesité la atención sanitaria y la he recibido) o a la categoría 3 (No necesité atención sanitaria).

**MÓDULO DE DETERMINANTES DE LA SALUD**

**S.- CARACTERÍSTICAS FÍSICAS**

**Introducción P.109:** Entrevistador/a, léale al informante: “Ahora le voy a hacer unas preguntas sobre su talla y su peso.”

**109. ¿Podría decirme cuánto mide, aproximadamente, sin zapatos?**

|\_|\_|\_| cm      **NS**  998      **NC**  999

**110. ¿Y cuánto pesa, aproximadamente, sin zapatos ni ropa?**

|\_|\_|\_| kg      **NS**  998      **NC**  999

**T.- ACTIVIDAD FÍSICA**

**Introducción P.111:** Entrevistador/a, léale al informante: “Ahora voy a hacerle unas preguntas sobre la actividad física que realiza.”

**111. ¿Cuál de estas posibilidades describe mejor su actividad principal en el centro de trabajo, centro de enseñanza, hogar (labores domésticas)...?**

- @Sentado/a la mayor parte de la jornada \_\_\_\_\_  1
- De pie la mayor parte de la jornada sin efectuar grandes desplazamientos o esfuerzos \_\_\_\_\_  2
- Caminando, llevando algún peso, efectuando desplazamientos frecuentes \_\_\_\_\_  3
- Realizando tareas que requieren gran esfuerzo físico \_\_\_\_\_  4
- No aplicable \_\_\_\_\_  5
- No sabe \_\_\_\_\_  8
- No contesta \_\_\_\_\_  9

**112. ¿Cuál de estas posibilidades describe mejor la frecuencia con la que realiza alguna actividad física en su tiempo libre?**

- No hago ejercicio. El tiempo libre lo ocupo de forma casi completamente sedentaria (leer, ver la televisión, ir al cine, etc.) \_\_\_\_\_  1
- Hago alguna actividad física o deportiva ocasional (caminar o pasear en bicicleta, jardinería, gimnasia suave, actividades recreativas que requieren un ligero esfuerzo, etc.) \_\_\_\_\_  2
- Hago actividad física varias veces al mes (deportes, gimnasia, correr, natación, ciclismo, juegos de equipo, etc.) \_\_\_\_\_  3
- Hago entrenamiento deportivo o físico varias veces a la semana \_\_\_\_\_  4
- No sabe \_\_\_\_\_  8
- No contesta \_\_\_\_\_  9

Si el adulto seleccionado tiene 70 o más años → Ir a P.120.

**Introducción P.113:** Entrevistador/a, léale al informante: “Para concluir este apartado sobre el ejercicio físico y por su importancia para la salud, le pedimos que conteste también las siguientes preguntas acerca del tiempo que dedicó a actividades físicas en los últimos 7 días. Por favor, responda cada una de las preguntas aunque no se considere una persona activa. Piense en las actividades que hace como parte del trabajo, en la casa, para ir de un sitio a otro y también las que hace en su tiempo libre de descanso, ejercicio o deporte”.

**113-** En primer lugar piense en las actividades intensas que realizó en los últimos 7 días. Actividades intensas son las que requieren gran esfuerzo físico y le hacen respirar mucho más fuerte de lo normal, como levantar objetos pesados, cavar, ejercicios aeróbicos o pedalear rápido en bicicleta. Piense solamente en aquellas que realizó por lo menos durante 10 minutos seguidos.

**Durante los últimos 7 días, ¿cuántos días realizó actividades físicas intensas?**

- Días por semana \_\_\_\_\_ | \_ | → desplegable: 1, 2, ..., 7
- Ningún día con actividad física intensa \_\_\_\_\_  0 → Ir a P.115
- No sabe \_\_\_\_\_  8 → Ir a P.115
- No contesta \_\_\_\_\_  9 → Ir a P.115

**114- En uno de esos días, ¿cuánto tiempo en total le dedicó a actividades físicas intensas?**

- Horas por día \_\_\_\_\_ | \_ \_ |
- Minutos por día \_\_\_\_\_ | \_ \_ |
- No sabe \_\_\_\_\_  98
- No contesta \_\_\_\_\_  99

**115- Ahora piense por favor en todas aquellas actividades moderadas que realizó en los últimos 7 días. Actividades moderadas son aquellas que requieren un esfuerzo físico moderado que le hace respirar algo más fuerte de lo normal, como llevar pesos ligeros, andar en bicicleta a velocidad regular o jugar dobles de tenis. Piense solamente en aquellas que realizó por lo menos durante 10 minutos seguidos.**

**Durante los últimos 7 días, ¿cuántos días realizó actividades físicas moderadas? Por favor, no incluya caminar.**

- Días por semana \_\_\_\_\_ | \_ | → desplegable: 1, 2, ..., 7
- Ningún día con actividad física moderada \_  0 → Ir a P.117
- No sabe \_\_\_\_\_  8 → Ir a P.117
- No contesta \_\_\_\_\_  9 → Ir a P.117

**116- En uno de esos días, ¿cuánto tiempo en total le dedicó a actividades físicas moderadas?**

- Horas por día \_\_\_\_\_ | \_ \_ |
- Minutos por día \_\_\_\_\_ | \_ \_ |
- No sabe \_\_\_\_\_  98
- No contesta \_\_\_\_\_  99

Se admite respuesta múltiple, pueden ir cumplimentadas la primera y la segunda. Las opciones NS/NC son incompatibles con las demás.



**117- Ahora piense acerca del tiempo que dedicó a caminar en los últimos 7 días. Esto incluye caminar en el trabajo, en la casa, para ir de un sitio a otro, o lo que paseó por deporte, ejercicio o placer. Piense solamente en aquellas ocasiones en que caminó por lo menos durante 10 minutos seguidos.**

- Días por semana \_\_\_\_\_ | \_ | → desplegable: 1, 2, ..., 7
- Ningún día más de 10 minutos seguidos \_\_\_  0 → [Ir a P.119](#)
- **No sabe** \_\_\_\_\_  8 → [Ir a P.119](#)
- **No contesta** \_\_\_\_\_  9 → [Ir a P.119](#)

**118- En los últimos 7 días, ¿cuánto tiempo en total dedicó a caminar en un día normal de la semana?**

- Horas por día \_\_\_\_\_ | \_ \_ |
- Minutos por día \_\_\_\_\_ | \_ \_ |
- **No sabe** \_\_\_\_\_  98
- **No contesta** \_\_\_\_\_  99

**119- La última pregunta se refiere al tiempo que permaneció @sentado/a en los últimos 7 días. Incluya el tiempo @sentado/a en el trabajo, la casa, en clase, estudiando, leyendo y en el transporte, tiempo libre o viendo la televisión.**

**En los últimos 7 días, ¿cuánto tiempo permaneció @sentado/a en un día normal de la semana?**

- Horas por día \_\_\_\_\_ | \_ \_ |
- Minutos por día \_\_\_\_\_ | \_ \_ |
- **No sabe** \_\_\_\_\_  98
- **No contesta** \_\_\_\_\_  99

**U.- ALIMENTACIÓN**

**Introducción P.120: Entrevistador/a, léale al informante: “Le voy a hacer unas preguntas sobre alimentación.”**

**120. ¿Con qué frecuencia consume los siguientes alimentos?**

| Alimentos                                                                             | Frecuencias de consumo                                                          |                            |                            |                             |                            |                            |                            | No sabe                    | No contesta |
|---------------------------------------------------------------------------------------|---------------------------------------------------------------------------------|----------------------------|----------------------------|-----------------------------|----------------------------|----------------------------|----------------------------|----------------------------|-------------|
|                                                                                       | Una o más veces al día                                                          | De 4 a 6 veces a la semana | Tres veces a la semana     | Una o dos veces a la semana | Menos de 1 vez a la semana | Nunca                      |                            |                            |             |
| Fruta fresca (excluyendo zumos)                                                       | <input type="checkbox"/> 1 <input type="checkbox"/> N° <input type="checkbox"/> | <input type="checkbox"/> 2 | <input type="checkbox"/> 3 | <input type="checkbox"/> 4  | <input type="checkbox"/> 5 | <input type="checkbox"/> 6 | <input type="checkbox"/> 8 | <input type="checkbox"/> 9 |             |
| Carne (pollo, ternera, cerdo, cordero...)                                             | <input type="checkbox"/> 1                                                      | <input type="checkbox"/> 2 | <input type="checkbox"/> 3 | <input type="checkbox"/> 4  | <input type="checkbox"/> 5 | <input type="checkbox"/> 6 | <input type="checkbox"/> 8 | <input type="checkbox"/> 9 |             |
| Huevos                                                                                | <input type="checkbox"/> 1                                                      | <input type="checkbox"/> 2 | <input type="checkbox"/> 3 | <input type="checkbox"/> 4  | <input type="checkbox"/> 5 | <input type="checkbox"/> 6 | <input type="checkbox"/> 8 | <input type="checkbox"/> 9 |             |
| Pescado                                                                               | <input type="checkbox"/> 1                                                      | <input type="checkbox"/> 2 | <input type="checkbox"/> 3 | <input type="checkbox"/> 4  | <input type="checkbox"/> 5 | <input type="checkbox"/> 6 | <input type="checkbox"/> 8 | <input type="checkbox"/> 9 |             |
| Pasta, arroz, patatas                                                                 | <input type="checkbox"/> 1                                                      | <input type="checkbox"/> 2 | <input type="checkbox"/> 3 | <input type="checkbox"/> 4  | <input type="checkbox"/> 5 | <input type="checkbox"/> 6 | <input type="checkbox"/> 8 | <input type="checkbox"/> 9 |             |
| Pan, cereales                                                                         | <input type="checkbox"/> 1                                                      | <input type="checkbox"/> 2 | <input type="checkbox"/> 3 | <input type="checkbox"/> 4  | <input type="checkbox"/> 5 | <input type="checkbox"/> 6 | <input type="checkbox"/> 8 | <input type="checkbox"/> 9 |             |
| Verduras, ensaladas y hortalizas                                                      | <input type="checkbox"/> 1 <input type="checkbox"/> N° <input type="checkbox"/> | <input type="checkbox"/> 2 | <input type="checkbox"/> 3 | <input type="checkbox"/> 4  | <input type="checkbox"/> 5 | <input type="checkbox"/> 6 | <input type="checkbox"/> 8 | <input type="checkbox"/> 9 |             |
| Legumbres                                                                             | <input type="checkbox"/> 1                                                      | <input type="checkbox"/> 2 | <input type="checkbox"/> 3 | <input type="checkbox"/> 4  | <input type="checkbox"/> 5 | <input type="checkbox"/> 6 | <input type="checkbox"/> 8 | <input type="checkbox"/> 9 |             |
| Embutidos y fiambres                                                                  | <input type="checkbox"/> 1                                                      | <input type="checkbox"/> 2 | <input type="checkbox"/> 3 | <input type="checkbox"/> 4  | <input type="checkbox"/> 5 | <input type="checkbox"/> 6 | <input type="checkbox"/> 8 | <input type="checkbox"/> 9 |             |
| Productos lácteos (leche, queso, yogur)                                               | <input type="checkbox"/> 1                                                      | <input type="checkbox"/> 2 | <input type="checkbox"/> 3 | <input type="checkbox"/> 4  | <input type="checkbox"/> 5 | <input type="checkbox"/> 6 | <input type="checkbox"/> 8 | <input type="checkbox"/> 9 |             |
| Dulces (galletas, bollería, mermeladas, cereales con azúcar, caramelos)               | <input type="checkbox"/> 1                                                      | <input type="checkbox"/> 2 | <input type="checkbox"/> 3 | <input type="checkbox"/> 4  | <input type="checkbox"/> 5 | <input type="checkbox"/> 6 | <input type="checkbox"/> 8 | <input type="checkbox"/> 9 |             |
| Refrescos con azúcar                                                                  | <input type="checkbox"/> 1                                                      | <input type="checkbox"/> 2 | <input type="checkbox"/> 3 | <input type="checkbox"/> 4  | <input type="checkbox"/> 5 | <input type="checkbox"/> 6 | <input type="checkbox"/> 8 | <input type="checkbox"/> 9 |             |
| Comida rápida (pollo frito, bocadillos, pizzas, hamburguesas)                         | <input type="checkbox"/> 1                                                      | <input type="checkbox"/> 2 | <input type="checkbox"/> 3 | <input type="checkbox"/> 4  | <input type="checkbox"/> 5 | <input type="checkbox"/> 6 | <input type="checkbox"/> 8 | <input type="checkbox"/> 9 |             |
| Aperitivos o comidas saladas de picar (patatas fritas, ganchitos, galletitas saladas) | <input type="checkbox"/> 1                                                      | <input type="checkbox"/> 2 | <input type="checkbox"/> 3 | <input type="checkbox"/> 4  | <input type="checkbox"/> 5 | <input type="checkbox"/> 6 | <input type="checkbox"/> 8 | <input type="checkbox"/> 9 |             |
| Zumo natural de frutas o verduras                                                     | <input type="checkbox"/> 1 <input type="checkbox"/> N° <input type="checkbox"/> | <input type="checkbox"/> 2 | <input type="checkbox"/> 3 | <input type="checkbox"/> 4  | <input type="checkbox"/> 5 | <input type="checkbox"/> 6 | <input type="checkbox"/> 8 | <input type="checkbox"/> 9 |             |

Al marcar “Una o más veces al día” en la Opción 1 (Fruta fresca excluyendo zumos) debe aparecer la pregunta emergente **120.A ‘¿Cuántas piezas de fruta consume a diario?’** con un desplegable para seleccionar valores desde 01 hasta 10, NS y NC.

Al marcar “Una o más veces al día” en la Opción 7 (Verduras, ensaladas y hortalizas) debe aparecer la pregunta emergente **120.B ‘¿Cuántas veces al día?’** con un desplegable para seleccionar valores desde 01 hasta 10, NS y NC.

Al marcar “Una o más veces al día” en la Opción 15 (Zumo natural de frutas o verduras) debe aparecer la pregunta emergente **120.C ‘¿Cuántas veces al día?’** con un desplegable para seleccionar valores desde 01 hasta 10, NS y NC.

\*Solo si P120.1 (Fruta fresca) = 2 y P120.15 (Zumo natural) = 2 → se pasa a la pregunta 120.D

\*En otro caso → **Ir a P120F**

**120.D Considerando ahora de manera conjunta su consumo de fruta fresca y zumos naturales a la semana, ¿toma a diario al menos uno de ellos?**

- Sí \_\_\_\_\_  1  
 No \_\_\_\_\_  2  
 No sabe \_\_\_\_\_  8  
 No contesta \_\_\_\_\_  9

Si P120.D = 2, 8, 9 → Ir a P. 120F

**120.E ¿Cuántas piezas de fruta o vasos de zumo natural consume a diario?**

Se inserta un desplegable para seleccionar valores desde 01 hasta 10, NS y NC.

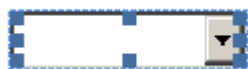

NS  98    NC  99

## U2. HIGIENE DENTAL

**120F.- Ahora le voy a preguntar sobre su higiene dental, ¿cuántas veces al día se cepilla los dientes habitualmente?**

- Nunca \_\_\_\_\_  1
- Ocasionalmente, no todos los días \_\_\_\_\_  2
- Una vez al día \_\_\_\_\_  3
- Dos veces al día \_\_\_\_\_  4
- Tres o más veces al día \_\_\_\_\_  5
- No sabe \_\_\_\_\_  8
- No contesta \_\_\_\_\_  9

**V.- CONSUMO DE TABACO Y EXPOSICIÓN AL HUMO DE TABACO**

**Introducción P.121:** Entrevistador/a, léale al informante: “Las siguientes preguntas se refieren al consumo de tabaco y a la exposición al humo de tabaco.”

**121. ¿Podría decirme si fuma?**

- Sí, fumo a diario .....  1
- Sí fumo, pero no a diario .....  2
- No fumo actualmente pero he fumado antes .....  3
- No fumo ni he fumado nunca de manera habitual .....  4
- No sabe .....  8
- No contesta .....  9

Si P.121= 3, 4, 8, 9 → Ir a P.126

**122. ¿Qué tipo de tabaco fuma con mayor frecuencia?**

- Cigarrillos (incluido el tabaco de liar) .....  1
- Puros .....  2
- Tabaco de pipa .....  3
- Otros .....  4
- No sabe .....  8
- No contesta .....  9

**Nota P.122:** Entrevistador/a, solamente es posible una respuesta.

Si P.121=1 y P.122=1 → Ir a P.123  
 Si P.121=1 y P.122<>1 → Ir a P.124  
 En otro caso → Ir a P.126

**123. Por término medio, ¿cuántos cigarrillos fuma usted al día?**

Número de cigarrillos:   NS  98  NC  99

**124. ¿A qué edad empezó a fumar?**

Edad en años:   NS  98  NC  99

125. Durante los últimos 12 meses, ¿cuántos intentos serios de dejar de fumar ha realizado en los que consiguiera estar al menos 24 horas sin fumar?

NS  8 NC  9

Aparecerá un desplegable con los valores "0", "1", "2", "3", "4", "5 ó más".

126. ¿Con qué frecuencia está @expuesto/a al humo del tabaco en lugares cerrados? Considere solo aquellas situaciones en las que son otras personas las que están fumando.

- Nunca o casi nunca.....  1
- Menos de una hora al día.....  2
- Entre 1 y 5 horas al día.....  3
- Más de 5 horas al día.....  4
- No sabe.....  8
- No contesta.....  9

Nota P.126: **Entrevistador/a**, se refiere a la exposición al humo del tabaco en casa, en el trabajo, lugares públicos, restaurantes...

## W.- CONSUMO DE ALCOHOL

**Introducción P.127:** Entrevistador/a, léale al informante: “Las siguientes preguntas se refieren al consumo de bebidas alcohólicas durante los últimos 12 meses.”

**127. Durante los últimos 12 meses, ¿con qué frecuencia ha tomado bebidas alcohólicas de cualquier tipo (es decir, cerveza, vino, licores, bebidas destiladas y combinados u otras bebidas alcohólicas)?**

- A diario o casi a diario .....  01
- 5-6 días por semana .....  02
- 3-4 días por semana .....  03
- 1-2 días por semana .....  04
- 2-3 días en un mes .....  05
- Una vez al mes .....  06
- Menos de una vez al mes .....  07
- No en los últimos 12 meses, he dejado de tomar alcohol .....  08
- Nunca o solamente unos sorbos para probarlo a lo largo de toda la vida .....  09
- No sabe .....  98
- No contesta .....  99

Si P.127 = 05, 06, 07 → Ir a Introducción P.129

Si P.127 = 08, 09, 98, 99 → Ir a Introducción P.130

**128. Durante los últimos 12 meses, en una semana en que desarrolló su actividad habitual, ¿cuántas bebidas que contengan alcohol consumió a lo largo de la semana?**

|                  | Cervezas con alcohol                                                                                                                        | Vinos, Cava                                                                                                                                 | Vermuts, fino, jerez                                                                                                                        | Licores, anís, pacharán                                                                                                                     | Whisky, coñac, combinados ...                                                                                                               | Bebidas 'locales' sidra, carajillo                                                                                                          |
|------------------|---------------------------------------------------------------------------------------------------------------------------------------------|---------------------------------------------------------------------------------------------------------------------------------------------|---------------------------------------------------------------------------------------------------------------------------------------------|---------------------------------------------------------------------------------------------------------------------------------------------|---------------------------------------------------------------------------------------------------------------------------------------------|---------------------------------------------------------------------------------------------------------------------------------------------|
| <b>Lunes</b>     | Sí <input checked="" type="checkbox"/> <b>HS</b> <input type="checkbox"/><br>No <input type="checkbox"/> <b>NC</b> <input type="checkbox"/> | Sí <input type="checkbox"/> <b>HS</b> <input type="checkbox"/><br>No <input checked="" type="checkbox"/> <b>NC</b> <input type="checkbox"/> | Sí <input type="checkbox"/> <b>HS</b> <input type="checkbox"/><br>No <input checked="" type="checkbox"/> <b>NC</b> <input type="checkbox"/> | Sí <input checked="" type="checkbox"/> <b>HS</b> <input type="checkbox"/><br>No <input type="checkbox"/> <b>NC</b> <input type="checkbox"/> | Sí <input type="checkbox"/> <b>HS</b> <input type="checkbox"/><br>No <input checked="" type="checkbox"/> <b>NC</b> <input type="checkbox"/> | Sí <input type="checkbox"/> <b>HS</b> <input type="checkbox"/><br>No <input type="checkbox"/> <b>NC</b> <input checked="" type="checkbox"/> |
|                  | 0 Cervezas                                                                                                                                  | Vasos, copas                                                                                                                                | Copas                                                                                                                                       | 0 Copas                                                                                                                                     | Copas                                                                                                                                       | Vasos, copas                                                                                                                                |
| <b>Martes</b>    | 0 Cervezas                                                                                                                                  | Vasos, copas                                                                                                                                | Copas                                                                                                                                       | 0 Copas                                                                                                                                     | Copas                                                                                                                                       | Vasos, copas                                                                                                                                |
| <b>Miércoles</b> | 0 Cervezas                                                                                                                                  | Vasos, copas                                                                                                                                | Copas                                                                                                                                       | 0 Copas                                                                                                                                     | Copas                                                                                                                                       | Vasos, copas                                                                                                                                |
| <b>Jueves</b>    | 0 Cervezas                                                                                                                                  | Vasos, copas                                                                                                                                | Copas                                                                                                                                       | 0 Copas                                                                                                                                     | Copas                                                                                                                                       | Vasos, copas                                                                                                                                |
| <b>Viernes</b>   | 0 Cervezas                                                                                                                                  | Vasos, copas                                                                                                                                | Copas                                                                                                                                       | 0 Copas                                                                                                                                     | Copas                                                                                                                                       | Vasos, copas                                                                                                                                |
| <b>Sábado</b>    | 0 Cervezas                                                                                                                                  | Vasos, copas                                                                                                                                | Copas                                                                                                                                       | 0 Copas                                                                                                                                     | Copas                                                                                                                                       | Vasos, copas                                                                                                                                |
| <b>Domingo</b>   | 0 Cervezas                                                                                                                                  | Vasos, copas                                                                                                                                | Copas                                                                                                                                       | 0 Copas                                                                                                                                     | Copas                                                                                                                                       | Vasos, copas                                                                                                                                |

**Introducción P.129:** Entrevistador/a, entregue al informante la tarjeta Ad-2 y léale: “En esta tarjeta puede observar la equivalencia de las bebidas alcohólicas más comunes con la llamada bebida estándar. De acuerdo a estas equivalencias, podría contestarme...”

Si el adulto seleccionado es hombre, presentar enunciado P129.A

Si el adulto seleccionado es mujer, presentar enunciado P129.B

**129.A** Durante los últimos 12 meses, ¿con qué frecuencia ha tomado 6 o más bebidas estándar en una misma ocasión? (Por “ocasión” entendemos tomar las bebidas en un intervalo aproximado de 4-6 horas).

**129.B** Durante los últimos 12 meses, ¿con qué frecuencia ha tomado 5 o más bebidas estándar en una misma ocasión? (Por “ocasión” entendemos tomar las bebidas en un intervalo aproximado de 4-6 horas).

- A diario o casi a diario.....  01  
 De 5 a 6 días por semana.....  02  
 De 3 a 4 días por semana.....  03  
 De 1 a 2 días por semana.....  04  
 De 2 a 3 días en un mes.....  05  
 Una vez al mes.....  06  
 Menos de una vez al mes.....  07  
 No en los últimos 12 meses.....  08  
 Nunca en toda mi vida.....  09  
 No sabe.....  98  
 No contesta.....  99

## X.- APOYO AFECTIVO Y PERSONAL

**Introducción P.130:** Entrevistador/a, léale al informante: “Ahora le voy a hacer unas preguntas sobre el apoyo afectivo que recibe”.

**130.-** Entrevistador/a, léale al informante: “Voy a entregarle una tarjeta con diferentes situaciones de apoyo afectivo y personal que suelen ocurrir en la vida cotidiana. Al lado de cada situación hay un conjunto de respuestas. Por favor, lea cada situación y dígame una por una el número de la respuesta que mejor refleje su situación”.

|                                                                                            | Mucho menos de lo que deseo | Menos de lo que deseo      | Ni mucho ni poco           | Casi como deseo            | Tanto como deseo           | No sabe                    | No contesta                |
|--------------------------------------------------------------------------------------------|-----------------------------|----------------------------|----------------------------|----------------------------|----------------------------|----------------------------|----------------------------|
| 1.- Recibo visitas de mis amigos y familiares                                              | <input type="checkbox"/> 1  | <input type="checkbox"/> 2 | <input type="checkbox"/> 3 | <input type="checkbox"/> 4 | <input type="checkbox"/> 5 | <input type="checkbox"/> 8 | <input type="checkbox"/> 9 |
| 2.- Recibo ayuda en asuntos relacionados con mi casa                                       | <input type="checkbox"/> 1  | <input type="checkbox"/> 2 | <input type="checkbox"/> 3 | <input type="checkbox"/> 4 | <input type="checkbox"/> 5 | <input type="checkbox"/> 8 | <input type="checkbox"/> 9 |
| 3.- Recibo elogios y reconocimientos cuando hago bien mi trabajo                           | <input type="checkbox"/> 1  | <input type="checkbox"/> 2 | <input type="checkbox"/> 3 | <input type="checkbox"/> 4 | <input type="checkbox"/> 5 | <input type="checkbox"/> 8 | <input type="checkbox"/> 9 |
| 4.- Cuento con personas que se preocupan de lo que me sucede                               | <input type="checkbox"/> 1  | <input type="checkbox"/> 2 | <input type="checkbox"/> 3 | <input type="checkbox"/> 4 | <input type="checkbox"/> 5 | <input type="checkbox"/> 8 | <input type="checkbox"/> 9 |
| 5.- Recibo amor y afecto                                                                   | <input type="checkbox"/> 1  | <input type="checkbox"/> 2 | <input type="checkbox"/> 3 | <input type="checkbox"/> 4 | <input type="checkbox"/> 5 | <input type="checkbox"/> 8 | <input type="checkbox"/> 9 |
| 6.- Tengo la posibilidad de hablar con alguien de mis problemas en el trabajo o en la casa | <input type="checkbox"/> 1  | <input type="checkbox"/> 2 | <input type="checkbox"/> 3 | <input type="checkbox"/> 4 | <input type="checkbox"/> 5 | <input type="checkbox"/> 8 | <input type="checkbox"/> 9 |
| 7.- Tengo la posibilidad de hablar con alguien de mis problemas personales y familiares    | <input type="checkbox"/> 1  | <input type="checkbox"/> 2 | <input type="checkbox"/> 3 | <input type="checkbox"/> 4 | <input type="checkbox"/> 5 | <input type="checkbox"/> 8 | <input type="checkbox"/> 9 |
| 8.- Tengo la posibilidad de hablar con alguien de mis problemas económicos                 | <input type="checkbox"/> 1  | <input type="checkbox"/> 2 | <input type="checkbox"/> 3 | <input type="checkbox"/> 4 | <input type="checkbox"/> 5 | <input type="checkbox"/> 8 | <input type="checkbox"/> 9 |
| 9.- Recibo invitaciones para distraerme y salir con otras personas                         | <input type="checkbox"/> 1  | <input type="checkbox"/> 2 | <input type="checkbox"/> 3 | <input type="checkbox"/> 4 | <input type="checkbox"/> 5 | <input type="checkbox"/> 8 | <input type="checkbox"/> 9 |
| 10.- Recibo consejos útiles cuando me ocurre algún acontecimiento importante en mi vida    | <input type="checkbox"/> 1  | <input type="checkbox"/> 2 | <input type="checkbox"/> 3 | <input type="checkbox"/> 4 | <input type="checkbox"/> 5 | <input type="checkbox"/> 8 | <input type="checkbox"/> 9 |
| 11.- Recibo ayuda cuando estoy enfermo en la cama                                          | <input type="checkbox"/> 1  | <input type="checkbox"/> 2 | <input type="checkbox"/> 3 | <input type="checkbox"/> 4 | <input type="checkbox"/> 5 | <input type="checkbox"/> 8 | <input type="checkbox"/> 9 |

## Y.- CUIDADO A OTRAS PERSONAS CON PROBLEMAS DE SALUD

**Introducción P.133:** Entrevistador/a, léale al informante: “Las siguientes preguntas tratan de conocer si dedica tiempo al cuidado de alguna persona con problemas de salud.”

**133. ¿Cuida, al menos una vez a la semana, de alguna persona mayor o de alguien que tenga una dolencia crónica? No lo considere si forma parte de su trabajo.**

- Sí \_\_\_\_\_  1  
 No \_\_\_\_\_  2  
 No sabe \_\_\_\_\_  8  
 No contesta \_\_\_\_\_  9

Si P.133 <> 1 → Ir a FILTRO INGRESOS



**134. La persona o personas a las que cuida son:**

- Familiares \_\_\_\_\_  1  
 Otras personas \_\_\_\_\_  2  
 No sabe \_\_\_\_\_  8  
 No contesta \_\_\_\_\_  9

**Nota P.134:** Entrevistador/a, en caso de que las dos respuestas sean posibles, el informante debe contestar pensando en la persona a la que más tiempo dedica.

**135. En total, ¿cuántas horas a la semana dedica al cuidado de esta/s persona/s?**

- Menos de 10 horas a la semana \_\_\_\_\_  1  
 10 horas o más a la semana pero menos de 20 \_\_\_\_\_  2  
 20 horas a la semana o más \_\_\_\_\_  3  
 No sabe \_\_\_\_\_  8  
 No contesta \_\_\_\_\_  9

**Z.- INGRESOS****FILTRO INGRESOS**

- 1- Si **Informante C.Hogar = P. Seleccionada** en C.Adultos (Nº Orden INF = Nº Orden adulto seleccionado) entonces → **Ir a Introducción P.136 (Preguntas de ingresos)**.
- 2- Si **Informante C.Hogar <> P. Seleccionada** en C.Adultos (Nº Orden INF <> Nº Orden adulto seleccionado) y:
  - a. **P.25 (C.Hogar) = 1 (Si) → Ir a Introducción P.136 (Preguntas de ingresos)**
  - b. **P.25 (C.Hogar) = 2 (No)**, entonces:
    - i. Si P.26 (C.Hogar) <> 98 (“No sabe”) y P.28 (C.Hogar) <> 999998 y P.29 <> 98 → Ir a **Filtro P.140 (DNI)**
    - ii. Si P.26 (C.Hogar) = {01,...,08} y P.28 (C.Hogar) = 999998 y P.29 (C.Hogar) = 98 → Leer Introducción P.136 e **Ir a P138.D**
    - iii. Si P.26 (C.Hogar) = {01,...,08} y P.28 (C.Hogar) = 999998 y P.29 (C.Hogar) <> 98 → Ir a **Filtro P.140 (DNI)**
    - iv. Si P.26 (C.Hogar) = 98 (“No sabe”) y P.28 (C. Hogar) = 999998 y P.29 (C. Hogar) = 98 → **Ir a Introducción P.136**

- v. Si P.26 (C.Hogar) = 98 (“No sabe”) y P.28 (C. Hogar) = 999998 y P.29 (C. Hogar) <> 98 → **Ir a Filtro P.140 (DNI)**
- vi. Si P.26 (C.Hogar) = 98 (“No sabe”) y P.28 (C. Hogar) <> 999998 → **Ir a Filtro P.140 (DNI)**

En el caso 2b.ii y 2b.iv, si además el Informante C.Hogar (P.9) es ‘Otra persona’ (P.9 de C.Hogar = ‘OTRA PERSONA’) y Proxy\_2 = 2 (‘NO’) → Debe aparecer la nota:

**Entrevistador/a**, si el informante es el mismo que respondió a las preguntas de ingresos en el cuestionario de hogar, responda “No contesta” y vaya a la siguiente pregunta.

**Introducción P.136:** **Entrevistador/a**, léale al informante: “Para poder hacer comparaciones entre los distintos tipos de problemas de salud de las familias, es necesario conocer unos datos muy básicos sobre el nivel de ingresos de la familia.

“A continuación le voy a preguntar por los ingresos regulares del hogar. No incluya los ingresos de las personas residentes empleadas en el hogar ni de los huéspedes hijos.”

**136. De los siguientes tipos de ingresos que le voy a leer, ¿podría decirme cuáles de ellos reciben usted y los demás miembros de su hogar? Debe considerar las fuentes de cada miembro del hogar y las conjuntas.**

Nota P.136: **Se admite respuesta múltiple.**

- Ingresos del trabajo (por cuenta propia o ajena) \_\_\_\_\_
- Prestación y subsidios por desempleo \_\_\_\_\_
- Pensión por jubilación o viudedad \_\_\_\_\_
- Pensión por invalidez o incapacidad \_\_\_\_\_
- Prestaciones económicas por hijo a cargo u otras prestaciones económicas como ayudas a la familia... \_\_\_\_\_
- Prestaciones o subvenciones relacionadas con la vivienda \_\_\_\_\_
- Prestaciones o subvenciones relacionadas con la educación \_\_\_\_\_
- Otros ingresos regulares / Otro subsidio o prestación social regular \_\_\_\_\_
- Ninguna fuente de ingresos \_\_\_\_\_
- No sabe \_\_\_\_\_
- No contesta \_\_\_\_\_

Las respuestas “Ninguna fuente de ingresos”, “No sabe” y “No contesta” son excluyentes, no permiten otra respuesta marcada.

Si entre las respuestas 01 y 08 hay una única respuesta marcada → Ir a **P.138B**  
Si entre las respuestas 01 y 08 hay más de una respuesta marcada → Ir a **P.137**

Si P.136 = 98 ("No sabe") → Ir a **P138.A**

Si P.136 = 09, 99 ("Ninguna fuente de ingresos" o "No contesta") → Ir a **Filtro P.140**

**137. De estas fuentes de ingresos monetarios del hogar citadas, ¿cuál diría que es la principal?**

Ir a **P.138C**

**138A. Aunque no pueda en este momento especificar las fuentes de ingresos, ¿podría decir cuál es aproximadamente el ingreso mensual neto de todo el hogar (es decir, sumando todas las fuentes y descontando las retenciones por impuestos, Seguridad Social, etc.)?**

**138B. Pensando en la fuente de ingresos que ha mencionado, ¿podría decir cuál es aproximadamente el ingreso mensual neto de todo el hogar (es decir, sumando todas las fuentes y descontando las retenciones por impuestos, Seguridad Social, etc.)?**

**138C. Pensando en las fuentes de ingresos que ha mencionado, ¿podría decir cuál es aproximadamente el ingreso mensual neto de todo el hogar (es decir, sumando todas las fuentes y descontando las retenciones por impuestos, Seguridad Social, etc.)?**

**138D. ¿Podría decir cuál es el importe mensual aproximado de los ingresos del hogar, (es decir, sumando todas las fuentes y descontando las retenciones por impuestos, Seguridad Social, etc.)?**

Cantidad |\_\_|\_\_|\_\_|\_\_|\_\_|\_\_| euros → Ir a **Filtro P.140**

No sabe \_\_\_\_\_  999998

No contesta \_\_\_\_\_  999999 → Ir a **Filtro P.140**

**139. Si desconoce el valor exacto de los ingresos del hogar, ¿podría decirme cuál de los intervalos siguientes representa mejor el ingreso mensual neto de todo su hogar, tras las deducciones por los impuestos, Seguridad Social, etc.?**

- Menos de 570 euros \_\_\_\_\_  01
- De 570 a menos de 800 euros \_\_\_\_\_  02
- De 800 a menos de 1050 euros \_\_\_\_\_  03
- De 1050 a menos de 1.300 euros \_\_\_\_\_  04
- De 1.300 a menos de 1.550 euros \_\_\_\_\_  05
- De 1.550 a menos de 1.800 euros \_\_\_\_\_  06
- De 1.800 a menos de 2.200 euros \_\_\_\_\_  07
- De 2.200 a menos de 2.700 euros \_\_\_\_\_  08
- De 2.700 a menos de 3.600 euros \_\_\_\_\_  09
- De 3.600 a menos de 4.500 euros \_\_\_\_\_  10
- De 4.500 a menos de 6.000 euros \_\_\_\_\_  11
- De 6.000 euros en adelante \_\_\_\_\_  12
- No sabe \_\_\_\_\_  98
- No contesta \_\_\_\_\_  99

**Filtro P.140:** Si la persona seleccionada tiene relleno el campo NIF por estar en la lista inicial de personas precargadas de Padrón → Ir a P.141.

**140. Para finalizar, ¿le importaría facilitarme su DNI, número de la tarjeta de residencia o pasaporte?**

**140.1-Tipo de Documento 140.2-Nº de Documento 140.3-Letra final del NIF o NIE**

- NIF \_\_\_\_\_  1 |\_|\_|\_|\_|\_|\_|\_| - |\_|
- Pasaporte \_\_\_\_\_  2
- NIE (tarjeta de residente) \_\_\_\_\_  3
- No sabe \_\_\_\_\_  8
- No contesta \_\_\_\_\_  9

Si P140.1 = 1 ó 3 → activar P140.2 y P140.3

Si P140.1 = 2 → activar P140.2

Si P140.1 = 8 ó 9, entonces imputar P140.2=blanco, P140.3=blanco y saltar a P.141

**INFORMACIÓN SOBRE LA ENTREVISTA**

**141. Idioma**

**Entrevistador/a,** anote el idioma empleado principalmente por el informante para responder al Cuestionario de Adulto:

- Castellano \_\_\_\_\_  1
- Catalán \_\_\_\_\_  2
- Valenciano \_\_\_\_\_  3
- Euskera \_\_\_\_\_  4
- Gallego \_\_\_\_\_  5
- Inglés \_\_\_\_\_  6
- Otro \_\_\_\_\_  7

**142. Nota final**

**Entrevistador/a:** Anote las observaciones que considere oportunas al final de este cuestionario.

| Observaciones |
|---------------|
| .....         |
| .....         |
| .....         |
| .....         |

**FIN DEL CUESTIONARIO DE ADULTOS PASAR AL PARTE DE TRABAJO**
