# Supplementary material for: Temporal Evolution and Associated Factors of Adherence to Mammography Screening among Women in Spain: Results from Two National Health Surveys (2017–2020)
Source: MDPI journal article supplement (doi:10.3390/healthcare11222934), 2023-11-09
Supplement: s1 [file s1]

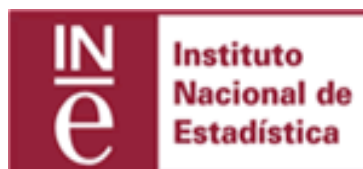

---

# **ENCUESTA EUROPEA DE SALUD EN ESPAÑA 2020**

## ***CUESTIONARIO INDIVIDUAL***

**Proxy\_0. ¿El informante es la persona seleccionada?**

Sí ☐ 1 → Ir a Introducción P.1  
 No ☐ 2

**Proxy\_1. ¿Cuál es el motivo por el que la persona seleccionada no puede facilitar personalmente sus datos?**

La persona seleccionada está ingresada en un sanatorio, hospital,  
 etc., a causa de una enfermedad \_\_\_\_\_ ☐ 1  
 La persona seleccionada está incapacitada para contestar por discapacidad,  
 enfermedad grave, etc. \_\_\_\_\_ ☐ 2  
 La persona seleccionada está incapacitada para contestar por  
 causa del idioma \_\_\_\_\_ ☐ 3

**Proxy\_2. ¿Es miembro del hogar el informante?**

Sí \_\_\_\_\_ ☐ 1 → Listado de miembros del hogar: | \_ | (proxy\_2b) → Ir a Proxy\_5  
 No \_\_\_\_\_ ☐ 2

**Proxy\_3. Nombre del informante:** \_\_\_\_\_

**Proxy\_3b. Sexo del informante:** ☐ 1 Hombre ☐ 2 Mujer

**Proxy\_4. Edad del informante:** \_\_\_\_

**Proxy\_5. ¿Cuál es la relación del informante con la persona seleccionada?**

- Cónyuge o pareja \_\_\_\_\_ ☐ 1  
 Hijo/Hija \_\_\_\_\_ ☐ 2  
 Padre/madre \_\_\_\_\_ ☐ 3  
 Hermano/hermana \_\_\_\_\_ ☐ 4  
 Otros familiares \_\_\_\_\_ ☐ 5  
 Servicios sociales \_\_\_\_\_ ☐ 6  
 Voluntarios \_\_\_\_\_ ☐ 7  
 Otra relación \_\_\_\_\_ ☐ 8

**E.- CARACTERÍSTICAS DEMOGRÁFICAS DE LA PERSONA ADULTA SELECCIONADA**

**Introducción P.1: Entrevistador/a, léale al informante: “A continuación voy a hacerle unas preguntas sobre su nacionalidad y su estado civil”.**

**1. ¿Cuál es su país de nacimiento?**

- España \_\_\_\_\_ ☐ 1  
 Extranjero \_\_\_\_\_ ☐ 2 → 1b- Seleccionar país  
 No sabe \_\_\_\_\_ ☐ 8  
 No contesta \_\_\_\_\_ ☐ 9

**1c. ¿Cuál es el país de nacimiento de su madre?**

- España \_\_\_\_\_ ☐ 1  
 Extranjero \_\_\_\_\_ ☐ 2 → 1d- Seleccionar país  
 No sabe \_\_\_\_\_ ☐ 8  
 No contesta \_\_\_\_\_ ☐ 9

**1e. ¿Cuál es el país de nacimiento de su padre?**

- España \_\_\_\_\_ ☐ 1  
 Extranjero \_\_\_\_\_ ☐ 2 → 1f- Seleccionar país  
 No sabe \_\_\_\_\_ ☐ 8  
 No contesta \_\_\_\_\_ ☐ 9

**2. ¿Y cuál es su nacionalidad?**

Española \_\_\_\_\_ ☐  
 Extranjera \_\_\_\_\_ ☐ → **2b-**  
 No sabe \_\_\_\_\_ ☐  
 No contesta \_\_\_\_\_ ☐

Seleccionar país

Nota P.2: Se admite respuesta múltiple.

Si P.1 = 1 → Ir a P.4

**3. ¿Cuántos años lleva residiendo en España?**

Nº de años

☒ NS ☐ 98 ☒ NC ☐ 99

**4. De las siguientes opciones, ¿cuál describe su situación actual?**

Conviviendo con su cónyuge \_\_\_\_\_ ☐ 1  
 Conviviendo con una pareja de hecho \_\_\_\_\_ ☐ 2  
 No conviviendo en pareja \_\_\_\_\_ ☐ 3  
 No sabe \_\_\_\_\_ ☐ 8  
 No contesta \_\_\_\_\_ ☐ 9

**4b. ¿Cuál es su estado civil legal?**

Soltero/a \_\_\_\_\_ ☐ 1  
 Casado/a \_\_\_\_\_ ☐ 2  
 Viudo/a \_\_\_\_\_ ☐ 3  
 Separado/a legalmente \_\_\_\_\_ ☐ 4  
 Divorciado/a \_\_\_\_\_ ☐ 5  
 No sabe \_\_\_\_\_ ☐ 8  
 No contesta \_\_\_\_\_ ☐ 9

5. Por favor, detalle a continuación cuál es el mayor nivel de estudios que ha obtenido: \_\_\_\_\_

Entrevistador/a, codifique el nivel de estudios declarado por el adulto eleccionado en el literal anterior:

Nivel de estudios

\_ Nombre1 P.Apellido1 S.Apellido1

Las opciones que aparecen en el desplegable son:

|                                                                                                                                                      |    |
|------------------------------------------------------------------------------------------------------------------------------------------------------|----|
| No sabe leer o escribir (analfabetos)                                                                                                                | 01 |
| Estudios primarios incompletos (ha asistido menos de 5 años a la escuela)                                                                            | 02 |
| Educación primaria completa                                                                                                                          | 10 |
| Primera etapa de educación secundaria sin título de graduado en ESO y equivalentes (EGB, Bachillerato elemental)                                     | 21 |
| Primera etapa de educación secundaria con título de graduado en ESO y similares (EGB, Bachillerato elemental)                                        | 22 |
| Certificados de profesionalidad de nivel 1 y similares                                                                                               | 23 |
| Certificados de profesionalidad de nivel 2 y similares                                                                                               | 24 |
| Bachillerato y similares (BUP, COU, PREU)                                                                                                            | 32 |
| Enseñanzas de formación profesional de grado medio (incluye artes plásticas, diseño, deportivas y similares)                                         | 33 |
| Enseñanzas profesionales de música y danza y similares                                                                                               | 34 |
| Certificado de las escuelas oficiales de idiomas de nivel avanzado y similares                                                                       | 35 |
| Formación profesional básica                                                                                                                         | 38 |
| Certificados de profesionalidad de nivel 3; programas cortos que requieren segunda etapa de secundaria y similares                                   | 41 |
| Enseñanzas de formación profesional de grado superior (incluye artes plásticas, diseño, deportivas y equivalentes)                                   | 51 |
| Títulos propios universitarios que precisan del título de bachiller, de duración igual o superior a 2 años                                           | 52 |
| Grados universitarios de 240 créditos ECTS (plan Bolonia) y equivalentes                                                                             | 61 |
| Diplomados universitarios y equivalentes                                                                                                             | 62 |
| Títulos propios universitarios de experto o especialista de menos de 60 créditos ECTS (plan Bolonia) cuyo acceso requiera ser titulado universitario | 63 |
| Grados universitarios de más de 240 créditos ECTS (plan Bolonia) y equivalentes                                                                      | 71 |
| Licenciados universitarios y equivalentes                                                                                                            | 72 |
| Másteres oficiales universitarios y equivalentes                                                                                                     | 73 |
| Especialidades en Ciencias de la Salud por el sistema de residencia o similares (MIR y equivalentes)                                                 | 74 |
| Títulos propios universitarios de máster (maestrías) de 60 o más créditos ECTS (plan Bolonia) cuyo acceso requiera ser titulado universitario        | 75 |
| Doctorado universitario                                                                                                                              | 81 |
| No contesta                                                                                                                                          | 99 |

## F.- RELACIÓN DE LA PERSONA ADULTA SELECCIONADA CON LA ACTIVIDAD ECONÓMICA

**Introducción P.6:** Entrevistador/a, léale al informante: “Ahora voy a hacerle unas preguntas sobre su relación con la actividad económica”.

Los flujos de este módulo están condicionados a la respuesta de la pregunta 11 del Cuestionario de Hogar para la persona seleccionada.

Si P.11 (C. Hogar) = 1 → Ir a P.13  
 Si P.11 (C. Hogar) = 2 → Ir a P.11  
 Si P.11 (C. Hogar) = 4, 6 ó 7 → Ir a P.12  
 Si P.11 (C. Hogar) = 3 ó 5 → Ir a P.6  
 Si P.11 (C. Hogar) = 8 → Ir a Módulo G

### 6. ¿Percibe alguna pensión contributiva?

|                                          |                                         |
|------------------------------------------|-----------------------------------------|
| Sí, por cotización propia _____          | <input type="checkbox"/> 1 → Ir a P.18b |
| Sí, por cotización de otra persona _____ | <input type="checkbox"/> 2 → Ir a P.8   |
| Sí, por ambos tipos de cotización _____  | <input type="checkbox"/> 3 → Ir a P.18b |
| No _____                                 | <input type="checkbox"/> 4              |
| No sabe _____                            | <input type="checkbox"/> 8              |
| No contesta _____                        | <input type="checkbox"/> 9              |

### 7. ¿Ha trabajado antes?

|                   |                            |
|-------------------|----------------------------|
| Sí _____          | <input type="checkbox"/> 1 |
| No _____          | <input type="checkbox"/> 2 |
| No sabe _____     | <input type="checkbox"/> 8 |
| No contesta _____ | <input type="checkbox"/> 9 |

Si P.7 = 1 y P.6 = 4, 8 ó 9 → Ir a P.18b  
 Si P.7 = 2, 8 ó 9 y P.6 = 4, 8 ó 9 → Ir a Módulo G

**8. ¿Cuál era la actividad de la empresa u organización en la que trabajó en su último empleo la persona que generó la pensión?**

Actividad .....

Código de actividad                     

**9. ¿Cuál era la ocupación, profesión u oficio que desempeñó en su último empleo la persona que generó la pensión?**

Profesión .....

Código de ocupación                     

**10. ¿Cuál era la situación profesional, en su último empleo, de la persona que generó la pensión?**

- Asalariado/a (a sueldo, comisión, jornal...) ☐ 1  
 Empresario/a o profesional con asalariados ☐ 2  
 Empresario/a sin asalariados o trabajador/a independiente ☐ 3  
 Ayuda familiar (sin remuneración reglamentada en la empresa o negocio de un familiar) ☐ 4  
 Miembro de una cooperativa ☐ 5  
 Otra situación ☐ 6  
 No sabe ☐ 8  
 No contesta ☐ 9

Ir a Módulo G

**11. ¿Cuánto tiempo lleva en desempleo?**

- No ha trabajado nunca ☐ 1 → Ir a Módulo G  
 Menos de 6 meses ☐ 2 → Ir a P.18b  
 De 6 meses a menos de 1 año ☐ 3 → Ir a P.18b  
 De 1 año a menos de 2 años ☐ 4 → Ir a P.18b  
 Más de 2 años ☐ 5 → Ir a P.18b  
 No sabe ☐ 8 → Ir a P.18b  
 No contesta ☐ 9 → Ir a P.18b

**12. Aunque actualmente no esté trabajando, ¿ha trabajado alguna vez anteriormente?**

- Sí \_\_\_\_\_ ☐ 1 → Ir a P.18b  
 No \_\_\_\_\_ ☐ 2 → Ir a Módulo G  
 No sabe \_\_\_\_\_ ☐ 8 → Ir a Módulo G  
 No contesta \_\_\_\_\_ ☐ 9 → Ir a Módulo G

**13. ¿Qué tipo de contrato o relación laboral tiene?**

- Asalariado/a (a sueldo, comisión, jornal...) \_\_\_\_\_ ☐
- Funcionario/a \_\_\_\_\_ ☐ 01 → Ir a P.15
- Señale el tipo de contrato: Duración indefinida \_\_\_\_\_ ☐ 02 → Ir a P.15
- Temporal \_\_\_\_\_ ☐ 03 → Ir a P.14a
- Verbal o sin contrato \_\_\_\_\_ ☐ 04 → Ir a P.14b
- Empresario/a o profesional con asalariados \_\_\_\_\_ ☐ 05 → Ir a P.15
- Empresario/a sin asalariados o trabajador/a independiente \_\_\_\_\_ ☐ 06 → Ir a P.15
- Ayuda familiar (sin remuneración reglamentada en la empresa o negocio de un familiar) \_\_\_\_\_ ☐ 07 → Ir a P.15
- Miembro de una cooperativa \_\_\_\_\_ ☐ 08 → Ir a P.15
- Otra situación \_\_\_\_\_ ☐ 09 → Ir a P.15
- No sabe \_\_\_\_\_ ☐ 98 → Ir a P.15
- No contesta \_\_\_\_\_ ☐ 99 → Ir a P.15

**14a. ¿Cuál es la duración de su contrato?**

- Menor de 6 meses \_\_\_\_\_ ☐ 1 → Ir a P.15  
 De 6 meses a menos de 1 año \_\_\_\_\_ ☐ 2 → Ir a P.15  
 De 1 año a menos de 2 años \_\_\_\_\_ ☐ 3 → Ir a P.15  
 De 2 años o más \_\_\_\_\_ ☐ 4 → Ir a P.15  
 Sin duración definida \_\_\_\_\_ ☐ 5 → Ir a P.15  
 No sabe \_\_\_\_\_ ☐ 8 → Ir a P.15  
 No contesta \_\_\_\_\_ ☐ 9 → Ir a P.15

**14b. ¿Cuál es la duración de su relación laboral?**

- Menor de 6 meses \_\_\_\_\_ ☐ 1  
 De 6 meses a menos de 1 año \_\_\_\_\_ ☐ 2  
 De 1 año a menos de 2 años \_\_\_\_\_ ☐ 3  
 De 2 años o más \_\_\_\_\_ ☐ 4  
 Sin duración definida \_\_\_\_\_ ☐ 5  
 No sabe \_\_\_\_\_ ☐ 8  
 No contesta \_\_\_\_\_ ☐ 9

**15. ¿Tiene trabajadores a su cargo?**

- No \_\_\_\_\_ ☐ 1  
 Sí, de 1 a 4 personas \_\_\_\_\_ ☐ 2  
 Sí, de 5 a 10 personas \_\_\_\_\_ ☐ 3  
 Sí, de 11 a 20 personas \_\_\_\_\_ ☐ 4  
 Sí, más de 20 personas \_\_\_\_\_ ☐ 5  
 No sabe \_\_\_\_\_ ☐ 8  
 No contesta \_\_\_\_\_ ☐ 9

**16. Su trabajo principal actual, ¿es a tiempo completo o a tiempo parcial?**

- A tiempo completo \_\_\_\_\_ ☐ 1  
 A tiempo parcial \_\_\_\_\_ ☐ 2  
 No sabe \_\_\_\_\_ ☐ 8  
 No contesta \_\_\_\_\_ ☐ 9

**17. ¿Qué tipo de jornada tiene habitualmente?**

- Jornada partida \_\_\_\_\_ ☐ 01
- Jornada continua \_\_\_\_\_ ☐
- Mañana \_\_\_\_\_ ☐ 02
- Tarde \_\_\_\_\_ ☐ 03
- Noche \_\_\_\_\_ ☐ 04
- Jornada reducida \_\_\_\_\_ ☐ 05
- Turnos \_\_\_\_\_ ☐ 06
- Jornada irregular o variable según los días \_\_\_\_\_ ☐ 07
- Otro tipo \_\_\_\_\_ ☐ 08
- No sabe \_\_\_\_\_ ☐ 98
- No contesta \_\_\_\_\_ ☐ 99

**18b. ¿Cuál era la actividad de la empresa u organización en la que trabajó en su último empleo?**

**Actividad** \_\_\_\_\_

**Código de actividad**

|  |  |  |  |
|--|--|--|--|
|  |  |  |  |
|--|--|--|--|

Ir a P.19b

**19a. ¿Cuál es la ocupación, profesión u oficio que desempeña en su empleo?**

**Profesión** \_\_\_\_\_

**Código de ocupación**     → Ir a Módulo G

19b. ¿Cuál era la ocupación, profesión u oficio que desempeñó en su último empleo?

Profesión \_\_\_\_\_

Código de ocupación 

|  |  |  |  |
|--|--|--|--|
|  |  |  |  |
|--|--|--|--|

**20. ¿Cuál era la situación profesional en la ocupación que desempeñó en su último empleo?**

|                                                                                       |                          |   |
|---------------------------------------------------------------------------------------|--------------------------|---|
| @Asalariado/a (a sueldo, comisión, jornal...)                                         | <input type="checkbox"/> | 1 |
| @Empresario/a o profesional con asalariados                                           | <input type="checkbox"/> | 2 |
| @Empresario/a sin asalariados o @trabajador/a independiente                           | <input type="checkbox"/> | 3 |
| Ayuda familiar (sin remuneración reglamentada en la empresa o negocio de un familiar) | <input type="checkbox"/> | 4 |
| Miembro de una cooperativa                                                            | <input type="checkbox"/> | 5 |
| Otra situación                                                                        | <input type="checkbox"/> | 6 |
| No sabe                                                                               | <input type="checkbox"/> | 8 |
| No contesta                                                                           | <input type="checkbox"/> | 9 |

## *MÓDULO DE ESTADO DE SALUD*

### G.- ESTADO DE SALUD

**Introducción P.21:** Entrevistador/a, léale al informante: “A continuación le voy a preguntar sobre su salud”.

**21. En los últimos doce meses, ¿diría que su estado de salud ha sido muy bueno, bueno, regular, malo, muy malo**

- |                 |                            |
|-----------------|----------------------------|
| Muy bueno _____ | <input type="checkbox"/> 1 |
| Bueno _____     | <input type="checkbox"/> 2 |
| Regular _____   | <input type="checkbox"/> 3 |
| Malo _____      | <input type="checkbox"/> 4 |
| Muy malo _____  | <input type="checkbox"/> 5 |

**22. ¿Tiene alguna enfermedad o problema de salud crónicos o de larga duración? (Entendemos por larga duración si el problema de salud o enfermedad ha durado o se espera que dure 6 meses o más)**

- |             |                            |
|-------------|----------------------------|
| Sí          | <input type="checkbox"/> 1 |
| No          | <input type="checkbox"/> 2 |
| No sabe     | <input type="checkbox"/> 8 |
| No contesta | <input type="checkbox"/> 9 |

**23. Durante al menos los últimos 6 meses, ¿en qué medida se ha visto limitado/a debido a un problema de salud para realizar las actividades que la gente habitualmente hace?**

- |                                      |                            |
|--------------------------------------|----------------------------|
| Gravemente limitado/a _____          | <input type="checkbox"/> 1 |
| Limitado/a, pero no gravemente _____ | <input type="checkbox"/> 2 |
| Nada limitado/a _____                | <input type="checkbox"/> 3 |
| No sabe _____                        | <input type="checkbox"/> 8 |
| No contesta _____                    | <input type="checkbox"/> 9 |

Si P.23 = 3, 8 ó 9 → Ir a la introducción de la P24a

**24. ¿Qué tipo de problema es la causa de su dificultad para realizar las actividades que la gente habitualmente hace?**

- Físico \_\_\_\_\_ ☐ 1  
 Mental \_\_\_\_\_ ☐ 2  
 Ambos \_\_\_\_\_ ☐ 3  
 No sabe \_\_\_\_\_ ☐ 8  
 No contesta \_\_\_\_\_ ☐ 9

**Introducción P.24A: Entrevistador/a, léale al informante: “A continuación le voy a preguntar sobre su salud bucodental”.**

**24A ¿Cómo describiría su estado de salud bucodental: muy bueno, bueno, regular, malo, muy malo?**

- Muy bueno \_\_\_\_\_ ☐ 1  
 Bueno \_\_\_\_\_ ☐ 2  
 Regular \_\_\_\_\_ ☐ 3  
 Malo \_\_\_\_\_ ☐ 4  
 Muy malo \_\_\_\_\_ ☐ 5  
 No sabe \_\_\_\_\_ ☐ 8  
 No contesta \_\_\_\_\_ ☐ 9

**25. A continuación le voy a leer una lista con una serie de enfermedades o problemas de salud. ¿Padece o ha padecido alguna vez alguna de ellas?**

|                                       | 25.a ¿Alguna vez ha padecido ...?                                                                                      | 25.b ¿La ha padecido en los últimos 12 meses?                                                                          | 25.c ¿Le ha dicho un médico que la padece?                                                                             |
|---------------------------------------|------------------------------------------------------------------------------------------------------------------------|------------------------------------------------------------------------------------------------------------------------|------------------------------------------------------------------------------------------------------------------------|
| Tensión alta                          | <input type="radio"/> SI (1) <input type="radio"/> NS (8)<br><input type="radio"/> NO (2) <input type="radio"/> NC (9) | <input type="radio"/> SI (1) <input type="radio"/> NS (8)<br><input type="radio"/> NO (2) <input type="radio"/> NC (9) | <input type="radio"/> SI (1) <input type="radio"/> NS (8)<br><input type="radio"/> NO (2) <input type="radio"/> NC (9) |
| Infarto de miocardio                  | <input type="radio"/> SI (1) <input type="radio"/> NS (8)<br><input type="radio"/> NO (2) <input type="radio"/> NC (9) | <input type="radio"/> SI (1) <input type="radio"/> NS (8)<br><input type="radio"/> NO (2) <input type="radio"/> NC (9) | <input type="radio"/> SI (1) <input type="radio"/> NS (8)<br><input type="radio"/> NO (2) <input type="radio"/> NC (9) |
| Angina de pecho, enfermedad coronaria | <input type="radio"/> SI (1) <input type="radio"/> NS (8)<br><input type="radio"/> NO (2) <input type="radio"/> NC (9) | <input type="radio"/> SI (1) <input type="radio"/> NS (8)<br><input type="radio"/> NO (2) <input type="radio"/> NC (9) | <input type="radio"/> SI (1) <input type="radio"/> NS (8)<br><input type="radio"/> NO (2) <input type="radio"/> NC (9) |
| Otras enfermedades del corazón        | <input type="radio"/> SI (1) <input type="radio"/> NS (8)<br><input type="radio"/> NO (2) <input type="radio"/> NC (9) | <input type="radio"/> SI (1) <input type="radio"/> NS (8)<br><input type="radio"/> NO (2) <input type="radio"/> NC (9) | <input type="radio"/> SI (1) <input type="radio"/> NS (8)<br><input type="radio"/> NO (6) <input type="radio"/> NC (9) |

Lista de Enfermedades que deben aparecer en la pregunta:

|                                                                                                                                    |
|------------------------------------------------------------------------------------------------------------------------------------|
| 1. Tensión alta                                                                                                                    |
| 2. Infarto de miocardio                                                                                                            |
| 3. Angina de pecho, enfermedad coronaria                                                                                           |
| 4. Otras enfermedades del corazón                                                                                                  |
| 5. Varices en las piernas                                                                                                          |
| 6. Artrosis (excluyendo artritis)                                                                                                  |
| 7. Dolor de espalda crónico (cervical)                                                                                             |
| 8. Dolor de espalda crónico (lumbar)                                                                                               |
| 9. Alergia crónica, como rinitis, conjuntivitis o dermatitis alérgica, alergia alimentaria o de otro tipo (asma alérgica excluida) |
| 10. Asma (incluida asma alérgica)                                                                                                  |
| 11. Bronquitis crónica, enfisema, enfermedad pulmonar obstructiva crónica (EPOC)                                                   |
| 12. Diabetes                                                                                                                       |
| 13. Úlcera de estómago o duodeno                                                                                                   |
| 14. Incontinencia urinaria o problemas de control de la orina                                                                      |
| 15. Colesterol alto                                                                                                                |
| 16. Cataratas                                                                                                                      |
| 17. Problemas crónicos de piel                                                                                                     |
| 18. Estreñimiento crónico                                                                                                          |
| 19. Cirrosis, disfunción hepática                                                                                                  |
| 20. Depresión                                                                                                                      |
| 21. Ansiedad crónica                                                                                                               |
| 22. Otros problemas mentales                                                                                                       |
| 23. Ictus (embolia, infarto cerebral, hemorragia cerebral)                                                                         |
| 24. Migraña o dolor de cabeza frecuente                                                                                            |
| 25. Hemorroides                                                                                                                    |
| 26. Tumores malignos                                                                                                               |
| 27. Osteoporosis                                                                                                                   |
| 28. Problemas de tiroides                                                                                                          |
| 29. Problemas de riñón                                                                                                             |

**Filtro: (para infarto)**  
 Si P25.a\_2 = 1 y Si P25.b\_2 = 2,8,9 en la enfermedad 2. (infarto de miocardio) preguntar P25d\_2 después de preguntar P25c\_2

En otro caso no preguntar

**P25.d.\_2 ¿Ha sufrido, en los últimos 12 meses ,secuelas del infarto de miocardio que padeció?**

Sí ☐ 1 No ☐ 2 No sabe ☐ 8 No contesta ☐ 9

**Filtro: (para ictus)**  
 Si P25.a\_23 = 1 y Si P25.b\_23 = 2, 8, 9 en la enfermedad 23. (ictus) preguntar P25d\_23 después de preguntar P25c\_23

En otro caso no preguntar

**P25.d.\_23 ¿Ha sufrido, en los últimos 12 meses ,secuelas del ictus que padeció?**

Sí ☐ 1 No ☐ 2 No sabe ☐ 8 No contesta ☐ 9

|                                                               |
|---------------------------------------------------------------|
| 30. Problemas de próstata (solo hombres)                      |
| 31. Problemas del periodo menopáusico (solo mujeres)          |
| 32. Lesiones o defectos permanentes causados por un accidente |

## H.- ACCIDENTALIDAD

**26. Durante los últimos 12 meses, ¿ha tenido alguno de los siguientes tipos de accidente en el que haya resultado herido/a o lesionado/a?**

**Nota P.26:** Se incluyen los casos de intoxicación, picaduras de insectos y las heridas provocadas por animales. Se excluyen los actos intencionados por parte de otra persona.

|                                             | Sí                           | No                           | No sabe                      | No contesta                  |
|---------------------------------------------|------------------------------|------------------------------|------------------------------|------------------------------|
| <b>A. Accidente de tráfico</b>              | <input type="checkbox"/> (1) | <input type="checkbox"/> (2) | <input type="checkbox"/> (8) | <input type="checkbox"/> (9) |
| <b>B. Accidente en casa</b>                 | <input type="checkbox"/> (1) | <input type="checkbox"/> (2) | <input type="checkbox"/> (8) | <input type="checkbox"/> (9) |
| <b>C. Accidente durante su tiempo libre</b> | <input type="checkbox"/> (1) | <input type="checkbox"/> (2) | <input type="checkbox"/> (8) | <input type="checkbox"/> (9) |

Si P26.A=1 o P26.B=1 o P26.C=1 → Ir a P.27

En otro caso ir a Filtro P30.

**27. ¿Recibió atención médica como consecuencia de este/os accidente/s?**

**Nota P.27:** No se admite respuesta múltiple. En caso de que el informante haya tenido más de un accidente, la respuesta debe reflejar la atención médica recibida por el accidente más grave.

- Ingresó en un hospital \_\_\_\_\_ ☐ 1  
 Acudió a un centro de urgencias \_\_\_\_\_ ☐ 2  
 Consultó a un médico o enfermero/a \_\_\_\_\_ ☐ 3  
 No hizo ninguna consulta ni intervención \_\_\_\_\_ ☐ 4  
 No sabe \_\_\_\_\_ ☐ 8  
 No contesta \_\_\_\_\_ ☐ 9

Filtro P30.

Si P.11 (Cuestionario de Hogar) = 1 para el adulto seleccionado → Ir a P.30

Si P.11 (Cuestionario de Hogar) <>1 para el adulto seleccionado → Ir a Introducción P.32

## J.- AUSENCIA DEL TRABAJO POR PROBLEMAS DE SALUD

30. En los últimos 12 meses, ¿ha faltado al trabajo por problemas de salud? Tenga en cuenta todas las clases de enfermedad, problemas de salud o lesiones que usted padeció y por los que tuvo que faltar a su trabajo.

- Sí \_\_\_\_\_ ☐ 1  
 No \_\_\_\_\_ ☐ 2  
 No sabe \_\_\_\_\_ ☐ 8  
 No contesta \_\_\_\_\_ ☐ 9

Si P.30 <>1 → Ir a Introducción P.32

31. ¿Y cuántos días faltó en total?

|\_|\_|\_| días

- No sabe \_\_\_\_\_ ☐ 998  
 No contesta \_\_\_\_\_ ☐ 999

## K.- LIMITACIONES FÍSICAS Y SENSORIALES

Introducción P.32: Entrevistador/a, léale al informante: “A continuación le voy a preguntar sobre situaciones en las que podría encontrarse en su vida diaria. Por favor, no tenga en cuenta los problemas temporales.”

32. ¿Utiliza gafas o lentillas?

- Sí \_\_\_\_\_ ☐ 1  
 No \_\_\_\_\_ ☐ 2  
 Soy ciego/a o no puedo ver en absoluto \_\_\_\_\_ ☐ 3  
 No sabe \_\_\_\_\_ ☐ 8  
 No contesta \_\_\_\_\_ ☐ 9

Si P.32=3,8,9 → Ir a P.34

Si P.32=1 mostrar P33.a

Si P.32=2 mostrar P33.b

**33a. ¿Tiene dificultad para ver utilizando sus gafas o lentillas?**

**33b. ¿Tiene dificultad para ver?**

- No, ninguna dificultad \_\_\_\_\_ ☐ 1  
 Sí, alguna dificultad \_\_\_\_\_ ☐ 2  
 Sí, mucha dificultad \_\_\_\_\_ ☐ 3  
 No puedo ver en absoluto \_\_\_\_\_ ☐ 4  
 No sabe \_\_\_\_\_ ☐ 8  
 No contesta \_\_\_\_\_ ☐ 9

**34. ¿Utiliza audífono?**

- Sí \_\_\_\_\_ ☐ 1  
 No \_\_\_\_\_ ☐ 2  
 Soy sordo/a profundo/a \_\_\_\_\_ ☐ 3  
 No sabe \_\_\_\_\_ ☐ 8  
 No contesta \_\_\_\_\_ ☐ 9

Si P.34=3,8,9 → Ir a P.37

Si P.34=1 mostrar P35.a

Si P.34=2 mostrar P35.b

**35a. ¿Tiene dificultad para oír lo que se dice en una conversación con otra persona en un sitio tranquilo utilizando su audífono?**

**35b. ¿Tiene dificultad para oír lo que se dice en una conversación con otra persona en un sitio tranquilo?**

- No, ninguna dificultad \_\_\_\_\_ ☐ 1  
 Sí, alguna dificultad \_\_\_\_\_ ☐ 2  
 Sí, mucha dificultad \_\_\_\_\_ ☐ 3  
 No puedo hacerlo en absoluto \_\_\_\_\_ ☐ 4  
 No sabe \_\_\_\_\_ ☐ 8  
 No contesta \_\_\_\_\_ ☐ 9

Si P.35 = 4, 8, 9 → Ir a P.37

Si P.34=1 mostrar P36.a

Si P.34=2 mostrar P36.b

**36a. ¿Tiene dificultad para oír lo que se dice en una conversación con otra persona en un sitio más ruidoso aunque utilice su audífono?**

**36b. ¿Tiene dificultad para oír lo que se dice en una conversación con otra persona en un sitio más ruidoso?**

- No, ninguna dificultad \_\_\_\_\_ ☐ 1  
 Sí, alguna dificultad \_\_\_\_\_ ☐ 2  
 Sí, mucha dificultad \_\_\_\_\_ ☐ 3  
 No puedo hacerlo en absoluto \_\_\_\_\_ ☐ 4  
 No sabe \_\_\_\_\_ ☐ 8  
 No contesta \_\_\_\_\_ ☐ 9

**37. ¿Tiene dificultad para caminar 500 metros sobre un terreno llano sin ningún tipo de ayuda para andar?**

- No, ninguna dificultad \_\_\_\_\_ ☐ 1  
 Sí, alguna dificultad \_\_\_\_\_ ☐ 2  
 Sí, mucha dificultad \_\_\_\_\_ ☐ 3  
 No puedo hacerlo en absoluto \_\_\_\_\_ ☐ 4  
 No sabe \_\_\_\_\_ ☐ 8  
 No contesta \_\_\_\_\_ ☐ 9

**38. ¿Tiene dificultad para subir o bajar 12 escalones?**

- No, ninguna dificultad \_\_\_\_\_ ☐ 1  
 Sí, alguna dificultad \_\_\_\_\_ ☐ 2  
 Sí, mucha dificultad \_\_\_\_\_ ☐ 3  
 No puedo hacerlo en absoluto \_\_\_\_\_ ☐ 4  
 No sabe \_\_\_\_\_ ☐ 8  
 No contesta \_\_\_\_\_ ☐ 9

**38.a ¿Tiene dificultad para recordar o para concentrarse?**

- No, ninguna dificultad \_\_\_\_\_ ☐ 1  
 Sí, alguna dificultad \_\_\_\_\_ ☐ 2  
 Sí, mucha dificultad \_\_\_\_\_ ☐ 3  
 No puedo hacerlo en absoluto \_\_\_\_\_ ☐ 4  
 No sabe \_\_\_\_\_ ☐ 8  
 No contesta \_\_\_\_\_ ☐ 9

Si la persona seleccionada tiene menos de 55 años → Ir a Introducción P.45

**38.b ¿Tiene dificultad para morder o masticar alimentos duros?**

- No, ninguna dificultad \_\_\_\_\_ ☐ 1  
 Sí, alguna dificultad \_\_\_\_\_ ☐ 2  
 Sí, mucha dificultad \_\_\_\_\_ ☐ 3  
 No puedo hacerlo en absoluto \_\_\_\_\_ ☐ 4  
 No sabe \_\_\_\_\_ ☐ 8  
 No contesta \_\_\_\_\_ ☐ 9

**L.- LIMITACIONES PARA LA REALIZACIÓN DE LAS ACTIVIDADES DE LA VIDA COTIDIANA**

**Introducción P.39:** Entrevistador/a, léale al informante: “Piense ahora en sus actividades básicas diarias. No tenga en cuenta los problemas temporales.”

**39. De las actividades que le voy a leer, ¿habitualmente tiene dificultad para hacerlas sin ayuda?**

| Actividades                                                   | No, ninguna dificultad       | Sí, alguna dificultad        | Sí, mucha dificultad         | No puedo hacerlo por mí mismo/a |                              | No contesta                  |
|---------------------------------------------------------------|------------------------------|------------------------------|------------------------------|---------------------------------|------------------------------|------------------------------|
| A. Alimentarse                                                | <input type="checkbox"/> (1) | <input type="checkbox"/> (2) | <input type="checkbox"/> (3) | <input type="checkbox"/> (4)    | <input type="checkbox"/> (8) | <input type="checkbox"/> (9) |
| B. Sentarse, levantarse de una silla o de una cama, acostarse | <input type="checkbox"/> (1) | <input type="checkbox"/> (2) | <input type="checkbox"/> (3) | <input type="checkbox"/> (4)    | <input type="checkbox"/> (8) | <input type="checkbox"/> (9) |
| C Vestirse y desvestirse                                      | <input type="checkbox"/> (1) | <input type="checkbox"/> (2) | <input type="checkbox"/> (3) | <input type="checkbox"/> (4)    | <input type="checkbox"/> (8) | <input type="checkbox"/> (9) |
| D. Ir al servicio                                             | <input type="checkbox"/> (1) | <input type="checkbox"/> (2) | <input type="checkbox"/> (3) | <input type="checkbox"/> (4)    | <input type="checkbox"/> (8) | <input type="checkbox"/> (9) |
| E. Ducharse o bañarse                                         | <input type="checkbox"/> (1) | <input type="checkbox"/> (2) | <input type="checkbox"/> (3) | <input type="checkbox"/> (4)    | <input type="checkbox"/> (8) | <input type="checkbox"/> (9) |

Si P39.A=2,3,4 o P39.B=2,3,4 o P39.C=2,3,4 o P39.D=2,3,4 o P39.E=2,3,4 → Ir a Introducción P.40

En otro caso → ir a Introducción P.42

**Introducción P.40:** Entrevistador/a, léale al informante: “Considerando esta actividad o actividades en las que usted encuentra dificultades para hacerlas”.

**40. ¿Dispone habitualmente de ayuda para realizarlas?**

- Sí, al menos para una actividad \_\_\_\_\_ ☐ 1  
 No \_\_\_\_\_ ☐ 2  
 No sabe \_\_\_\_\_ ☐ 8  
 No contesta \_\_\_\_\_ ☐ 9

Si P.40 = 8,9 → Ir a Introducción P.42

Si P.40 =1 mostrar P41.a

Si P.40 =2 mostrar P41.b

**P41a. ¿Necesitaría más ayuda de la que dispone?**

**P41b. ¿Considera que necesita ayuda?**

- Sí, al menos para una actividad \_\_\_\_\_ ☐ 1  
 No \_\_\_\_\_ ☐ 2  
 No sabe \_\_\_\_\_ ☐ 8  
 No contesta \_\_\_\_\_ ☐ 9

**Introducción P.42:** Entrevistador/a, léale al informante: “A continuación, le voy a leer una serie de actividades relacionadas con el hogar. De nuevo, no incluya problemas temporales”.

**P42. ¿Habitualmente tiene dificultad para hacer por sí mismo/a y sin ayuda alguna de estas actividades?**

| Actividades                                           | No, ninguna dificultad       | Sí, alguna dificultad        | Sí, mucha dificultad         | No puedo hacerlo en absoluto | No aplicable (nunca lo ha intentado o necesitado hacerlo) | No Sabe                      | No Contest a                 |
|-------------------------------------------------------|------------------------------|------------------------------|------------------------------|------------------------------|-----------------------------------------------------------|------------------------------|------------------------------|
| A. Preparar las comidas                               | <input type="checkbox"/> (1) | <input type="checkbox"/> (2) | <input type="checkbox"/> (3) | <input type="checkbox"/> (4) | <input type="checkbox"/> (5)                              | <input type="checkbox"/> (8) | <input type="checkbox"/> (9) |
| B. Utilizar el teléfono (buscar el número, marcar...) | <input type="checkbox"/> (1) | <input type="checkbox"/> (2) | <input type="checkbox"/> (3) | <input type="checkbox"/> (4) | <input type="checkbox"/> (5)                              | <input type="checkbox"/> (8) | <input type="checkbox"/> (9) |

|                                                                                                                                                       |                              |                              |                              |                              |                              |                              |                              |
|-------------------------------------------------------------------------------------------------------------------------------------------------------|------------------------------|------------------------------|------------------------------|------------------------------|------------------------------|------------------------------|------------------------------|
| <b>C. Realizar compras (comprar la comida, la ropa...)</b>                                                                                            | <input type="checkbox"/> (1) | <input type="checkbox"/> (2) | <input type="checkbox"/> (3) | <input type="checkbox"/> (4) | <input type="checkbox"/> (5) | <input type="checkbox"/> (8) | <input type="checkbox"/> (9) |
| <b>D. Tomar sus medicamentos, incluyendo acordarse de la cantidad y el momento en que los debe tomar</b>                                              | <input type="checkbox"/> (1) | <input type="checkbox"/> (2) | <input type="checkbox"/> (3) | <input type="checkbox"/> (4) | <input type="checkbox"/> (5) | <input type="checkbox"/> (8) | <input type="checkbox"/> (9) |
| <b>E. Realizar tareas domésticas ligeras como hacer la colada, hacer la cama, limpiar la casa...</b>                                                  | <input type="checkbox"/> (1) | <input type="checkbox"/> (2) | <input type="checkbox"/> (3) | <input type="checkbox"/> (4) | <input type="checkbox"/> (5) | <input type="checkbox"/> (8) | <input type="checkbox"/> (9) |
| <b>F. Realizar ocasionalmente tareas domésticas que requieren un gran esfuerzo como mover muebles, limpiar las ventanas, transportar la compra...</b> | <input type="checkbox"/> (1) | <input type="checkbox"/> (2) | <input type="checkbox"/> (3) | <input type="checkbox"/> (4) | <input type="checkbox"/> (5) | <input type="checkbox"/> (8) | <input type="checkbox"/> (9) |
| <b>G. Administrar su propio dinero (pagar recibos, tratar con el banco, firmar cheques...)</b>                                                        | <input type="checkbox"/> (1) | <input type="checkbox"/> (2) | <input type="checkbox"/> (3) | <input type="checkbox"/> (4) | <input type="checkbox"/> (5) | <input type="checkbox"/> (8) | <input type="checkbox"/> (9) |

Si P42.A=2,3,4 o P42.B=2,3,4 o P42.C=2,3,4 o P42.D=2,3,4 o P42.E=2,3,4 o P42.F=2,3,4 o P42.G=2,3,4 → Ir a Introducción P.43

En otro caso → Ir a Introducción P.45

**Introducción P.43: Entrevistador/a, léale al informante: “Considerando esta actividad o actividades en las que usted encuentra dificultades para hacerlas.”**

**43. ¿Dispone habitualmente de ayuda para realizarlas?**

- Sí, al menos para una actividad \_\_\_\_\_ ☐ 1  
 No \_\_\_\_\_ ☐ 2  
 No sabe \_\_\_\_\_ ☐ 8  
 No contesta \_\_\_\_\_ ☐ 9

Si P.43 = 8,9 → Ir a Introducción P.45

Si P.43 = 1 mostrar P44.a

Si P.43 = 2 mostrar P44.b

**P44a. ¿Necesitaría más ayuda de la que dispone?**

**P44b. ¿Considera que necesita ayuda?**

Sí, al menos para una actividad \_\_\_\_\_ ☐ 1

No \_\_\_\_\_ ☐ 2

No sabe \_\_\_\_\_ ☐ 8

No contesta \_\_\_\_\_ ☐ 9

**Introducción P.45: Entrevistador/a, léale al informante: “Las siguientes preguntas se refieren al dolor físico que ha podido tener en las últimas 4 semanas”.**

**P45. Durante las 4 últimas semanas, ¿qué grado de dolor ha padecido?**

Ninguno \_\_\_\_\_ ☐ 1

Muy leve \_\_\_\_\_ ☐ 2

Leve \_\_\_\_\_ ☐ 3

Moderado \_\_\_\_\_ ☐ 4

Severo \_\_\_\_\_ ☐ 5

Extremo \_\_\_\_\_ ☐ 6

No sabe \_\_\_\_\_ ☐ 8

No contesta \_\_\_\_\_ ☐ 9

**P46. Durante las 4 últimas semanas, ¿hasta qué punto el dolor afectó a sus actividades cotidianas?**

Nada \_\_\_\_\_ ☐ 1

Un poco \_\_\_\_\_ ☐ 2

Moderadamente \_\_\_\_\_ ☐ 3

Bastante \_\_\_\_\_ ☐ 4

Mucho \_\_\_\_\_ ☐ 5

No sabe \_\_\_\_\_ ☐ 8

No contesta \_\_\_\_\_ ☐ 9

## M.- SALUD MENTAL

**47. Durante las últimas 2 semanas, ¿con qué frecuencia ha tenido alguno de los siguientes problemas?**

|                                                                                                                                                                                       | Nunca                        | Varios días                  | Más de la mitad de los días  | Casi todos los días          | No sabe                      | No contesta                  |
|---------------------------------------------------------------------------------------------------------------------------------------------------------------------------------------|------------------------------|------------------------------|------------------------------|------------------------------|------------------------------|------------------------------|
| A. Poco interés o alegría por hacer cosas                                                                                                                                             | <input type="checkbox"/> (1) | <input type="checkbox"/> (2) | <input type="checkbox"/> (3) | <input type="checkbox"/> (4) | <input type="checkbox"/> (8) | <input type="checkbox"/> (9) |
| B. Sensación de estar decaído/a, deprimido/a o desesperanzado/a                                                                                                                       | <input type="checkbox"/> (1) | <input type="checkbox"/> (2) | <input type="checkbox"/> (3) | <input type="checkbox"/> (4) | <input type="checkbox"/> (8) | <input type="checkbox"/> (9) |
| C. Problemas para quedarse dormido/a, para seguir durmiendo o dormir demasiado                                                                                                        | <input type="checkbox"/> (1) | <input type="checkbox"/> (2) | <input type="checkbox"/> (3) | <input type="checkbox"/> (4) | <input type="checkbox"/> (8) | <input type="checkbox"/> (9) |
| D. Sensación de cansancio o de tener poca energía                                                                                                                                     | <input type="checkbox"/> (1) | <input type="checkbox"/> (2) | <input type="checkbox"/> (3) | <input type="checkbox"/> (4) | <input type="checkbox"/> (8) | <input type="checkbox"/> (9) |
| E. Poco apetito o comer demasiado                                                                                                                                                     | <input type="checkbox"/> (1) | <input type="checkbox"/> (2) | <input type="checkbox"/> (3) | <input type="checkbox"/> (4) | <input type="checkbox"/> (8) | <input type="checkbox"/> (9) |
| F. Sentirse mal consigo mismo/a, sentirse que es un fracasado/a o que ha decepcionado a su familia o a sí mismo/a                                                                     | <input type="checkbox"/> (1) | <input type="checkbox"/> (2) | <input type="checkbox"/> (3) | <input type="checkbox"/> (4) | <input type="checkbox"/> (8) | <input type="checkbox"/> (9) |
| G. Problemas para concentrarse en algo, como leer el periódico o ver la televisión                                                                                                    | <input type="checkbox"/> (1) | <input type="checkbox"/> (2) | <input type="checkbox"/> (3) | <input type="checkbox"/> (4) | <input type="checkbox"/> (8) | <input type="checkbox"/> (9) |
| H. Moverse o hablar tan despacio que los demás pueden haberlo notado. O lo contrario: estar tan inquieto/a o agitado/a que se ha estado moviendo de un lado a otro más de lo habitual | <input type="checkbox"/> (1) | <input type="checkbox"/> (2) | <input type="checkbox"/> (3) | <input type="checkbox"/> (4) | <input type="checkbox"/> (8) | <input type="checkbox"/> (9) |

## MÓDULO DE ASISTENCIA SANITARIA

### N.- CONSULTAS MÉDICAS Y OTROS SERVICIOS AMBULATORIOS

**Introducción P.48:** Entrevistador/a, léale al informante: “El siguiente grupo de preguntas hace referencia a las consultas con su médico general o médico de familia. Por favor, incluya tanto las visitas a la consulta de su médico, como las visitas domiciliarias y las consultas telefónicas.”

**48. ¿Cuándo fue la última vez que consultó al médico general o médico de familia para usted mismo/a?**

- En las últimas 4 semanas \_\_\_\_\_ ☐ 1  
 Entre 4 semanas y 12 meses \_\_\_\_\_ ☐ 2  
 Hace 12 meses o más \_\_\_\_\_ ☐ 3  
 Nunca \_\_\_\_\_ ☐ 4

Si P.48= 2 → Imputar P.49=0 e ir a Introducción P.50

Si P.48= 3,4 → Ir a Introducción P.50

**49. Durante las últimas 4 semanas contando desde ayer, es decir, desde el \_\_\_\_\_ (fecha del día anterior a la entrevista menos 28 días), ¿cuántas veces ha consultado con su médico general o médico de familia para usted mismo/a?**

|\_|\_| N° de veces      **NS** ☐ 98    **NC** ☐ 99

**Introducción P.50:** Entrevistador/a, léale al informante: “Las siguientes preguntas hacen referencia a consultas a especialistas. Se incluyen sólo las visitas a médicos en consultas externas o ambulatorias, pero no las visitas realizadas en el hospital como paciente ingresado o atendido en un hospital de día. No deben incluirse las visitas al dentista, aunque sí al cirujano maxilofacial.”

**50. ¿Cuándo fue la última vez que consultó a un especialista para usted mismo/a?**

- En las últimas 4 semanas \_\_\_\_\_ ☐ 1  
 Entre 4 semanas y 12 meses \_\_\_\_\_ ☐ 2  
 Hace 12 meses o más \_\_\_\_\_ ☐ 3  
 Nunca \_\_\_\_\_ ☐ 4  
 No sabe \_\_\_\_\_ ☐ 8  
 No contesta \_\_\_\_\_ ☐ 9

Si P.50= 2 → Imputar P.51=0 e ir a Filtro P.53

Si P.50= 3, 4, 8, 9 → Ir a Filtro P.53

**51. Durante las últimas 4 semanas contando desde ayer, es decir, desde el \_\_\_\_\_ (fecha del día anterior a la entrevista menos 28 días), ¿cuántas veces consultó a un especialista para usted mismo/a?**

|\_|\_| N° de veces      **NS** ☐ 98    **NC** ☐ 99

**FILTRO P.52:**

Si P.48=1 y P.50=1 → Ir a P.52

En otro caso → Ir a Filtro P.53

**52. El último médico que consultó, ¿era médico de familia/general o era especialista?**

- Médico de familia o médico general \_\_\_\_\_ ☐ 1  
 Especialista \_\_\_\_\_ ☐ 2  
 No sabe \_\_\_\_\_ ☐ 8  
 No contesta \_\_\_\_\_ ☐ 9

**Filtro P.53**

Si P.48=1 o P.50=1 → Ir a P.53

En otro caso → Ir a P.58

**53. ¿Dónde tuvo lugar la última consulta realizada durante las últimas cuatro semanas?**

- Centro de Salud/Consultorio \_\_\_\_\_ ☐ 01  
 Ambulatorio/Centro de especialidades \_\_\_\_\_ ☐ 02  
 Consulta externa de un hospital \_\_\_\_\_ ☐ 03  
 Servicio de Urgencias no hospitalario \_\_\_\_\_ ☐ 04  
 Servicio de Urgencias de un hospital \_\_\_\_\_ ☐ 05  
 Consulta de médico de una sociedad \_\_\_\_\_ ☐ 06  
 Consulta de médico particular \_\_\_\_\_ ☐ 07  
 Empresa o lugar de trabajo \_\_\_\_\_ ☐ 08  
 Domicilio del entrevistado \_\_\_\_\_ ☐ 09  
 Consulta telefónica \_\_\_\_\_ ☐ 10  
 Otro lugar \_\_\_\_\_ ☐ 11  
 No sabe \_\_\_\_\_ ☐ 98  
 No contesta \_\_\_\_\_ ☐ 99

Si P.53 = 04 ó 05 → Ir a P.57

**54. ¿Cuál fue el motivo principal de esta última consulta?**

- Diagnóstico de una enfermedad o problema de salud \_\_\_\_\_ ☐ 1  
 Un accidente o agresión \_\_\_\_\_ ☐ 2  
 Revisión \_\_\_\_\_ ☐ 3  
 Sólo dispensación de recetas \_\_\_\_\_ ☐ 4  
 Parte de baja, confirmación o alta \_\_\_\_\_ ☐ 5  
 Otros motivos \_\_\_\_\_ ☐ 6  
 No sabe \_\_\_\_\_ ☐ 8  
 No contesta \_\_\_\_\_ ☐ 9

**Filtro P.57**

Si P.53 = 01 ó 02 → Ir a P.57. Disponibles todas las categorías de respuesta.

Si P.53 = 06 ó 07 → Disponibles en P.57 solo respuestas 2, 3, 8 y 9

Si P.53 = 08 → Marcar en P.57 = 4 e Ir a P.58

**57. El médico al que acudió en esta última consulta realizada era de:**

- Sanidad Pública (Seguridad Social) \_\_\_\_\_ ☐ 1  
 Sociedad médica \_\_\_\_\_ ☐ 2  
 Consulta privada \_\_\_\_\_ ☐ 3  
 Otros (médico de empresa, etc.) \_\_\_\_\_ ☐ 4  
 No sabe \_\_\_\_\_ ☐ 8  
 No contesta \_\_\_\_\_ ☐ 9

58. En los últimos 12 meses, es decir, desde \_\_\_\_\_ (fecha de entrevista menos un año), ¿ha visitado para usted mismo/a un...?

|                                        | Sí                           | No                           | No sabe                      | No contesta                  |
|----------------------------------------|------------------------------|------------------------------|------------------------------|------------------------------|
| Fisioterapeuta                         | <input type="checkbox"/> (1) | <input type="checkbox"/> (2) | <input type="checkbox"/> (8) | <input type="checkbox"/> (9) |
| Psicólogo, psicoterapeuta o psiquiatra | <input type="checkbox"/> (1) | <input type="checkbox"/> (2) | <input type="checkbox"/> (8) | <input type="checkbox"/> (9) |
| Enfermero/a o matrona                  | <input type="checkbox"/> (1) | <input type="checkbox"/> (2) | <input type="checkbox"/> (8) | <input type="checkbox"/> (9) |

59. Durante los últimos 12 meses, es decir, desde \_\_\_\_\_ (fecha de entrevista menos un año), ¿se ha realizado algún análisis?

Sí \_\_\_\_\_ ☐ 1

No \_\_\_\_\_ ☐ 2

No sabe \_\_\_\_\_ ☐ 8

No contesta \_\_\_\_\_ ☐ 9

Nota P.59: **Entrevistador/a**, se incluye análisis de sangre, orina, heces, etc.

60. Durante los últimos 12 meses, es decir, desde \_\_\_\_\_ (fecha de entrevista menos un año), ¿se ha realizado alguna de las siguientes pruebas?

|                      | Sí                           | No                           | No sabe                      | No contesta                  |
|----------------------|------------------------------|------------------------------|------------------------------|------------------------------|
| Radiografía          | <input type="checkbox"/> (1) | <input type="checkbox"/> (2) | <input type="checkbox"/> (8) | <input type="checkbox"/> (9) |
| TAC o escáner        | <input type="checkbox"/> (1) | <input type="checkbox"/> (2) | <input type="checkbox"/> (8) | <input type="checkbox"/> (9) |
| Ecografía            | <input type="checkbox"/> (1) | <input type="checkbox"/> (2) | <input type="checkbox"/> (8) | <input type="checkbox"/> (9) |
| Resonancia magnética | <input type="checkbox"/> (1) | <input type="checkbox"/> (2) | <input type="checkbox"/> (8) | <input type="checkbox"/> (9) |

**60.a- Durante los últimos 12 meses, es decir, desde \_\_\_\_\_ (fecha de entrevista menos un año), ¿ha visitado para usted @mismo/a a un...?**

|                                                                               | <b>Sí</b>                    | <b>No</b>                    | <b>No sabe</b>               | <b>No contesta</b>           |
|-------------------------------------------------------------------------------|------------------------------|------------------------------|------------------------------|------------------------------|
| <b>Homeópata</b>                                                              | <input type="checkbox"/> (1) | <input type="checkbox"/> (2) | <input type="checkbox"/> (8) | <input type="checkbox"/> (9) |
| <b>Acupuntor</b>                                                              | <input type="checkbox"/> (1) | <input type="checkbox"/> (2) | <input type="checkbox"/> (8) | <input type="checkbox"/> (9) |
| <b>Naturista</b>                                                              | <input type="checkbox"/> (1) | <input type="checkbox"/> (2) | <input type="checkbox"/> (8) | <input type="checkbox"/> (9) |
| <b>Otro profesional de medicina alternativa (osteópata, quiropráctico...)</b> | <input type="checkbox"/> (1) | <input type="checkbox"/> (2) | <input type="checkbox"/> (8) | <input type="checkbox"/> (9) |

**61. Durante los últimos 12 meses, es decir, desde \_\_\_\_\_ (fecha de entrevista menos un año), ¿ha utilizado personalmente alguno de los siguientes servicios asistenciales?**

|                                                                                                                                          | <b>Sí</b>                    | <b>No</b>                    | <b>No sabe</b>               | <b>No contesta</b>           |
|------------------------------------------------------------------------------------------------------------------------------------------|------------------------------|------------------------------|------------------------------|------------------------------|
| <b>Atención domiciliaria por una enfermera o matrona</b>                                                                                 | <input type="checkbox"/> (1) | <input type="checkbox"/> (2) | <input type="checkbox"/> (8) | <input type="checkbox"/> (9) |
| <b>Ayuda domiciliaria para las tareas domésticas o para las personas mayores</b>                                                         | <input type="checkbox"/> (1) | <input type="checkbox"/> (2) | <input type="checkbox"/> (8) | <input type="checkbox"/> (9) |
| <b>Comidas a domicilio para personas mayores</b>                                                                                         | <input type="checkbox"/> (1) | <input type="checkbox"/> (2) | <input type="checkbox"/> (8) | <input type="checkbox"/> (9) |
| <b>Servicios especiales de transporte a domicilio para acudir a un servicio médico, a un hospital de día, actividades recreativas...</b> | <input type="checkbox"/> (1) | <input type="checkbox"/> (2) | <input type="checkbox"/> (8) | <input type="checkbox"/> (9) |
| <b>Otros servicios de asistencia domiciliaria</b>                                                                                        | <input type="checkbox"/> (1) | <input type="checkbox"/> (2) | <input type="checkbox"/> (8) | <input type="checkbox"/> (9) |

La tercera opción: “Comidas a domicilio para personas mayores” solo aparece si la persona adulta seleccionada es mayor de 65 años.

**Introducción P.62:** Entrevistador/a, léale al informante: “A continuación voy a hacerle unas preguntas sobre su salud dental.”

**62. ¿Cuándo fue la última vez que visitó al dentista, estomatólogo o higienista dental para usted mismo/a (es decir, no sólo como acompañante de un niño, de su pareja, etc.)?**

Hace 3 meses o menos \_\_\_\_\_ ☐ 1 62.b ¿Cuántas veces en los últimos 3 meses?   NS ☐ 98 NC ☐ 99

Hace más de 3 meses y menos de 6 \_\_\_\_\_ ☐ 2

Hace 6 meses o más pero menos de 12 \_\_\_\_\_ ☐ 3

Hace 12 meses o más \_\_\_\_\_ ☐ 4

Nunca \_\_\_\_\_ ☐ 5

Si P.62 = 1 se activa P.62b

Si P.62= 5 → Ir a P.65

**63. La última vez que acudió, ¿cuál o cuáles de los siguientes tipos de asistencia recibió?**

|                                               | Sí                           | No                           | No sabe                      | No contesta                  |
|-----------------------------------------------|------------------------------|------------------------------|------------------------------|------------------------------|
| Revisión o chequeo                            | <input type="checkbox"/> (1) | <input type="checkbox"/> (2) | <input type="checkbox"/> (8) | <input type="checkbox"/> (9) |
| Limpieza de boca                              | <input type="checkbox"/> (1) | <input type="checkbox"/> (2) | <input type="checkbox"/> (8) | <input type="checkbox"/> (9) |
| Empastes (obturaciones), endodoncias          | <input type="checkbox"/> (1) | <input type="checkbox"/> (2) | <input type="checkbox"/> (8) | <input type="checkbox"/> (9) |
| Extracción de algún diente/muela              | <input type="checkbox"/> (1) | <input type="checkbox"/> (2) | <input type="checkbox"/> (8) | <input type="checkbox"/> (9) |
| Fundas, puentes u otro tipo de prótesis       | <input type="checkbox"/> (1) | <input type="checkbox"/> (2) | <input type="checkbox"/> (8) | <input type="checkbox"/> (9) |
| Tratamiento de las enfermedades de las encías | <input type="checkbox"/> (1) | <input type="checkbox"/> (2) | <input type="checkbox"/> (8) | <input type="checkbox"/> (9) |
| Ortodoncia                                    | <input type="checkbox"/> (1) | <input type="checkbox"/> (2) | <input type="checkbox"/> (8) | <input type="checkbox"/> (9) |
| Aplicación de flúor                           | <input type="checkbox"/> (1) | <input type="checkbox"/> (2) | <input type="checkbox"/> (8) | <input type="checkbox"/> (9) |
| Implantes                                     | <input type="checkbox"/> (1) | <input type="checkbox"/> (2) | <input type="checkbox"/> (8) | <input type="checkbox"/> (9) |
| Otro tipo de asistencia                       | <input type="checkbox"/> (1) | <input type="checkbox"/> (2) | <input type="checkbox"/> (8) | <input type="checkbox"/> (9) |

**64. El dentista, estomatólogo o higienista dental al que consultó esta última vez era de:**

- Sanidad Pública (Seguridad Social, ayuntamiento, consulta privada financiada por el gobierno autónomo) \_\_\_\_\_ ☐ 1
- Sociedad médica \_\_\_\_\_ ☐ 2
- Consulta privada \_\_\_\_\_ ☐ 3
- Otros \_\_\_\_\_ ☐ 4
- No sabe \_\_\_\_\_ ☐ 8
- No contesta \_\_\_\_\_ ☐ 9

**65. ¿Cuál es el estado de sus dientes y muelas?**

|                                                                            | Sí                           | No                           | No sabe                      | No contesta                  |
|----------------------------------------------------------------------------|------------------------------|------------------------------|------------------------------|------------------------------|
| Tiene caries                                                               | <input type="checkbox"/> (1) | <input type="checkbox"/> (2) | <input type="checkbox"/> (8) | <input type="checkbox"/> (9) |
| Le han extraído dientes/muelas                                             | <input type="checkbox"/> (1) | <input type="checkbox"/> (2) | <input type="checkbox"/> (8) | <input type="checkbox"/> (9) |
| Tiene dientes/muelas empastados (obturados)                                | <input type="checkbox"/> (1) | <input type="checkbox"/> (2) | <input type="checkbox"/> (8) | <input type="checkbox"/> (9) |
| Le sangran las encías al cepillarse o espontáneamente                      | <input type="checkbox"/> (1) | <input type="checkbox"/> (2) | <input type="checkbox"/> (8) | <input type="checkbox"/> (9) |
| Se le mueven los dientes/muelas                                            | <input type="checkbox"/> (1) | <input type="checkbox"/> (2) | <input type="checkbox"/> (8) | <input type="checkbox"/> (9) |
| Lleva fundas (coronas), puentes, otro tipo de prótesis o dentadura postiza | <input type="checkbox"/> (1) | <input type="checkbox"/> (2) | <input type="checkbox"/> (8) | <input type="checkbox"/> (9) |
| Le faltan dientes/muelas que no han sido sustituidos por prótesis          | <input type="checkbox"/> (1) | <input type="checkbox"/> (2) | <input type="checkbox"/> (8) | <input type="checkbox"/> (9) |
| Tiene o conserva todos sus dientes/muelas naturales                        | <input type="checkbox"/> (1) | <input type="checkbox"/> (2) | <input type="checkbox"/> (8) | <input type="checkbox"/> (9) |

## O.- HOSPITALIZACIONES, URGENCIAS Y SEGURO SANITARIO

**Introducción P.66:** Entrevistador/a, léale al informante: “El siguiente grupo de preguntas hace referencia al tiempo pasado en un hospital. Se incluyen todos los tipos de hospital”.

Si la persona seleccionada es: (hombre) o (mujer de 52 años o más), mostrar P66.a  
Si la persona seleccionada es mujer menor de 52 años, mostrar P66.b

**66a. Durante los últimos doce meses, ¿ha tenido que ingresar como paciente al menos durante una noche?**

**66b. Durante los últimos doce meses, ¿ha tenido que ingresar como paciente al menos durante una noche excluyendo partos o cesáreas?**

Sí \_\_\_\_\_ ☐ 1

No \_\_\_\_\_ ☐ 2

Si P.66 = 1 → Ir a P.67

Si P.66 = 2 y es una mujer menor de 52 años → Ir a P.69

Resto de los casos → Ir a P.75

Si la persona seleccionada es: (hombre) o (mujer de 52 años o más), mostrar P67.a

Si la persona seleccionada es mujer menor de 52 años, mostrar P67.b

**67a. ¿Cuántas veces ha estado hospitalizado/a en estos últimos doce meses?**

**67b. ¿Cuántas veces ha estado hospitalizada en estos últimos doce meses? Nuevamente, no considere los partos o cesáreas.**

Nº de veces |\_|\_|

NS ☐ 98

NC ☐ 99

**68. Considerando estos ingresos, ¿cuántas noches en total ha pasado ingresado/a en un hospital en estos últimos 12 meses?**

|\_|\_|\_| Noches

NS ☐ 998

NC ☐ 999

Si la persona seleccionada es mujer menor de 52 años ---> Ir a P.69

Si la persona seleccionada es (hombre) o (mujer de 52 años o más) ---> Ir a P.71

**69. Durante los últimos doce meses, ¿ha tenido que ingresar en un hospital por parto o cesárea?**

Sí \_\_\_\_\_ ☐ 1

No \_\_\_\_\_ ☐ 2

No sabe \_\_\_\_\_ ☐ 8

No contesta \_\_\_\_\_ ☐ 9

Nota P.69: No deben incluirse las visitas a urgencias ni a hospitales de día.

Si P.69= 2, 8, 9 y P.66 = 2 → Ir a P.75

**71. En relación al último ingreso hospitalario, ¿cuál fue el motivo de su ingreso en el hospital?**

- Intervención quirúrgica \_\_\_\_\_ ☐ 1  
 Estudio médico para diagnóstico \_\_\_\_\_ ☐ 2  
 Tratamiento médico sin intervención quirúrgica \_\_\_\_\_ ☐ 3  
 Parto (incluye cesárea) \_\_\_\_\_ ☐ 4  
 Otros motivos \_\_\_\_\_ ☐ 5  
 No sabe \_\_\_\_\_ ☐ 8  
 No contesta \_\_\_\_\_ ☐ 9

**74. ¿A cargo de quién corrieron los gastos de su hospitalización?**

- Sanidad Pública (Seguridad Social) \_\_\_\_\_ ☐ 1  
 Mutualidad obligatoria (MUFACE, ISFAS, etc.) \_\_\_\_\_ ☐ 2  
 Sociedad médica privada \_\_\_\_\_ ☐ 3  
 A su propio cargo o de su hogar \_\_\_\_\_ ☐ 4  
 A cargo de otras personas, organismos o instituciones \_\_\_\_\_ ☐ 5  
 No sabe \_\_\_\_\_ ☐ 8  
 No contesta \_\_\_\_\_ ☐ 9

**Hospital de día**

**75. Durante los últimos doce meses, desde el \_\_\_\_\_ (fecha de entrevista menos un año), ¿ha sido usted atendido/a en un Hospital de día para una intervención, tratamiento o hacerse alguna prueba, es decir, permaneciendo durante todo o parte del día pero sin tener que pasar allí la noche? (Incluya ingresos en cama o sillón cama, no incluya estancias en urgencias ni en observación)**

- Sí \_\_\_\_\_ ☐ 1  
 No \_\_\_\_\_ ☐ 2  
 No sabe \_\_\_\_\_ ☐ 8  
 No contesta \_\_\_\_\_ ☐ 9

Si P.75 <>1 → Ir a P.78

**76. ¿Cuántos días ha tenido que acudir a un hospital de día, sin tener que pasar la noche?**

\_\_\_\_ Días

NS ☐ 998

NC ☐ 999

### **Servicios de urgencia**

**Introducción P.78:** Entrevistador/a, léale al informante: “Para terminar este apartado, voy a preguntarle ahora por su posible utilización de los servicios de urgencias”.

**78. En estos últimos doce meses, ¿ha tenido que utilizar algún servicio de urgencias por algún problema o enfermedad?**

Sí \_\_\_\_\_ ☐ 1

No \_\_\_\_\_ ☐ 2

Si P.78= 2 → Ir a P.84

**79. Y en total, ¿cuántas veces tuvo que utilizar un servicio de urgencias en estos doce meses?**

Nº de veces \_\_\_\_\_

NS ☐ 998

NC ☐ 999

**80. ¿Dónde fue atendido la última vez?**

Nota P.80: se admite respuesta múltiple.

En el lugar donde se encontraba (domicilio, lugar de trabajo, etc.) \_\_\_\_\_ ☐

En una unidad móvil \_\_\_\_\_ ☐

En un centro o servicio de urgencias \_\_\_\_\_ ☐

No sabe \_\_\_\_\_ ☐

No contesta \_\_\_\_\_ ☐

**81. La última vez que utilizó un servicio de urgencias, ¿cuánto tiempo pasó desde que empezó a notarse enfermo/a o sintió que tenía algún problema de salud hasta que pidió asistencia?**

Días \_\_\_\_\_

Horas \_\_\_\_\_

Minutos \_\_\_\_\_

No sabe \_\_\_\_\_ ☐ 98

No contesta \_\_\_\_\_ ☐ 99

**82. Y también esta última vez que utilizó un servicio de urgencias, ¿cuánto tiempo pasó desde que pidió asistencia hasta que fue @atendido/a?**

Horas \_\_\_\_\_

Minutos \_\_\_\_\_

No sabe \_\_\_\_\_ ☐ 98

No contesta \_\_\_\_\_ ☐ 99

**83. Y también esta última vez que utilizó un servicio de urgencias en estos doce últimos meses, ¿qué tipo de servicio utilizó?**

Hospital de la Sanidad Pública (Seguridad Social) \_\_\_\_\_ ☐ 1

Centro o servicio de urgencias no hospitalario de la Sanidad Pública (Seguridad Social). Por ejemplo, centro de salud, ambulatorio etc. \_\_\_\_\_ ☐ 2

Sanatorio, hospital o clínica privada \_\_\_\_\_ ☐ 3

Servicio privado de urgencias \_\_\_\_\_ ☐ 4

Casa de socorro o servicio de urgencias del ayuntamiento \_\_\_\_\_ ☐ 5

Otro tipo de servicio \_\_\_\_\_ ☐ 6

No sabe \_\_\_\_\_ ☐ 8

No contesta \_\_\_\_\_ ☐ 9

**84. ¿Podría decirme ahora, de cuál o cuáles de las siguientes modalidades de Seguro Sanitario (público y/o privado) es usted titular o beneficiario/a?**

- Sanidad pública (Seguridad Social) \_\_\_\_\_ ☐
- Mutualidades del Estado (MUFACE, ISFAS, MUGEJU) acogidas a la Seguridad Social \_\_\_\_\_ ☐
- Mutualidades del Estado (MUFACE, ISFAS, MUGEJU) acogidas a un seguro privado \_\_\_\_\_ ☐
- Seguro médico privado, concertado individualmente (sociedades médicas, Colegios Profesionales, etc.) \_\_\_\_\_ ☐
- Seguro médico concertado por la empresa \_\_\_\_\_ ☐
- No tengo seguro médico \_\_\_\_\_ ☐
- Otras situaciones \_\_\_\_\_ ☐
- No sabe \_\_\_\_\_ ☐
- No contesta \_\_\_\_\_ ☐

## **P.- CONSUMO DE MEDICAMENTOS**

**Introducción P.85:** Entrevistador/a, léale al informante: **“A continuación, le voy a preguntar sobre el consumo de medicamentos en las últimas 2 semanas.”**

**85. Durante las dos últimas semanas, ¿ha consumido algún medicamento que le fuera recetado por un médico?**

- Sí \_\_\_\_\_ ☐ 1
- No \_\_\_\_\_ ☐ 2

En otro caso  $\rightarrow$  Ir a P.88

|                                                                | Consumido                    |                              |                              |                              |  | Recetado                     |                              |                              |                              |
|----------------------------------------------------------------|------------------------------|------------------------------|------------------------------|------------------------------|--|------------------------------|------------------------------|------------------------------|------------------------------|
|                                                                | Sí                           | No                           | NS                           | NC                           |  | Sí                           | No                           | NS                           | NC                           |
| 1. Medicinas para el catarro, gripe, garganta, bronquios       | <input type="checkbox"/> (1) | <input type="checkbox"/> (2) | <input type="checkbox"/> (8) | <input type="checkbox"/> (9) |  | <input type="checkbox"/> (1) | <input type="checkbox"/> (2) | <input type="checkbox"/> (8) | <input type="checkbox"/> (9) |
| 2. Medicinas para el dolor                                     | <input type="checkbox"/> (1) | <input type="checkbox"/> (2) | <input type="checkbox"/> (8) | <input type="checkbox"/> (9) |  | <input type="checkbox"/> (1) | <input type="checkbox"/> (2) | <input type="checkbox"/> (8) | <input type="checkbox"/> (9) |
| 3. Medicinas para bajar la fiebre                              | <input type="checkbox"/> (1) | <input type="checkbox"/> (2) | <input type="checkbox"/> (8) | <input type="checkbox"/> (9) |  | <input type="checkbox"/> (1) | <input type="checkbox"/> (2) | <input type="checkbox"/> (8) | <input type="checkbox"/> (9) |
| 4. Reconstituyentes como vitaminas, minerales, tónicos         | <input type="checkbox"/> (1) | <input type="checkbox"/> (2) | <input type="checkbox"/> (8) | <input type="checkbox"/> (9) |  | <input type="checkbox"/> (1) | <input type="checkbox"/> (2) | <input type="checkbox"/> (8) | <input type="checkbox"/> (9) |
| 5. Laxantes                                                    | <input type="checkbox"/> (1) | <input type="checkbox"/> (2) | <input type="checkbox"/> (8) | <input type="checkbox"/> (9) |  | <input type="checkbox"/> (1) | <input type="checkbox"/> (2) | <input type="checkbox"/> (8) | <input type="checkbox"/> (9) |
| 6. Antibióticos                                                | <input type="checkbox"/> (1) | <input type="checkbox"/> (2) | <input type="checkbox"/> (8) | <input type="checkbox"/> (9) |  | <input type="checkbox"/> (1) | <input type="checkbox"/> (2) | <input type="checkbox"/> (8) | <input type="checkbox"/> (9) |
| 7. Tranquilizantes, relajantes, pastillas para dormir          | <input type="checkbox"/> (1) | <input type="checkbox"/> (2) | <input type="checkbox"/> (8) | <input type="checkbox"/> (9) |  | <input type="checkbox"/> (1) | <input type="checkbox"/> (2) | <input type="checkbox"/> (8) | <input type="checkbox"/> (9) |
| 8. Medicamentos para la alergia                                | <input type="checkbox"/> (1) | <input type="checkbox"/> (2) | <input type="checkbox"/> (8) | <input type="checkbox"/> (9) |  | <input type="checkbox"/> (1) | <input type="checkbox"/> (2) | <input type="checkbox"/> (8) | <input type="checkbox"/> (9) |
| 9. Medicamentos para la diarrea                                | <input type="checkbox"/> (1) | <input type="checkbox"/> (2) | <input type="checkbox"/> (8) | <input type="checkbox"/> (9) |  | <input type="checkbox"/> (1) | <input type="checkbox"/> (2) | <input type="checkbox"/> (8) | <input type="checkbox"/> (9) |
| 10. Medicinas para el reuma                                    | <input type="checkbox"/> (1) | <input type="checkbox"/> (2) | <input type="checkbox"/> (8) | <input type="checkbox"/> (9) |  | <input type="checkbox"/> (1) | <input type="checkbox"/> (2) | <input type="checkbox"/> (8) | <input type="checkbox"/> (9) |
| 11. Medicinas para el corazón                                  | <input type="checkbox"/> (1) | <input type="checkbox"/> (2) | <input type="checkbox"/> (8) | <input type="checkbox"/> (9) |  | <input type="checkbox"/> (1) | <input type="checkbox"/> (2) | <input type="checkbox"/> (8) | <input type="checkbox"/> (9) |
| 12. Medicinas para la tensión arterial                         | <input type="checkbox"/> (1) | <input type="checkbox"/> (2) | <input type="checkbox"/> (8) | <input type="checkbox"/> (9) |  | <input type="checkbox"/> (1) | <input type="checkbox"/> (2) | <input type="checkbox"/> (8) | <input type="checkbox"/> (9) |
| 13. Medicinas para el estómago y/o las alteraciones digestivas | <input type="checkbox"/> (1) | <input type="checkbox"/> (2) | <input type="checkbox"/> (8) | <input type="checkbox"/> (9) |  | <input type="checkbox"/> (1) | <input type="checkbox"/> (2) | <input type="checkbox"/> (8) | <input type="checkbox"/> (9) |
| 14. Antidepresivos, estimulantes                               | <input type="checkbox"/> (1) | <input type="checkbox"/> (2) | <input type="checkbox"/> (8) | <input type="checkbox"/> (9) |  | <input type="checkbox"/> (1) | <input type="checkbox"/> (2) | <input type="checkbox"/> (8) | <input type="checkbox"/> (9) |
| 15. Píldoras para no quedar embarazada (solo para mujeres)     | <input type="checkbox"/> (1) | <input type="checkbox"/> (2) | <input type="checkbox"/> (8) | <input type="checkbox"/> (9) |  | <input type="checkbox"/> (1) | <input type="checkbox"/> (2) | <input type="checkbox"/> (8) | <input type="checkbox"/> (9) |
| 16. Hormonas para la menopausia (solo para mujeres)            | <input type="checkbox"/> (1) | <input type="checkbox"/> (2) | <input type="checkbox"/> (8) | <input type="checkbox"/> (9) |  | <input type="checkbox"/> (1) | <input type="checkbox"/> (2) | <input type="checkbox"/> (8) | <input type="checkbox"/> (9) |
| 17. Medicamentos para adelgazar                                | <input type="checkbox"/> (1) | <input type="checkbox"/> (2) | <input type="checkbox"/> (8) | <input type="checkbox"/> (9) |  | <input type="checkbox"/> (1) | <input type="checkbox"/> (2) | <input type="checkbox"/> (8) | <input type="checkbox"/> (9) |
| 18. Medicamentos para bajar el colesterol                      | <input type="checkbox"/> (1) | <input type="checkbox"/> (2) | <input type="checkbox"/> (8) | <input type="checkbox"/> (9) |  | <input type="checkbox"/> (1) | <input type="checkbox"/> (2) | <input type="checkbox"/> (8) | <input type="checkbox"/> (9) |
| 19. Medicamentos para la diabetes                              | <input type="checkbox"/> (1) | <input type="checkbox"/> (2) | <input type="checkbox"/> (8) | <input type="checkbox"/> (9) |  | <input type="checkbox"/> (1) | <input type="checkbox"/> (2) | <input type="checkbox"/> (8) | <input type="checkbox"/> (9) |
| 20. Medicamentos para el tiroides                              | <input type="checkbox"/> (1) | <input type="checkbox"/> (2) | <input type="checkbox"/> (8) | <input type="checkbox"/> (9) |  | <input type="checkbox"/> (1) | <input type="checkbox"/> (2) | <input type="checkbox"/> (8) | <input type="checkbox"/> (9) |
| 21. Productos homeopáticos                                     | <input type="checkbox"/> (1) | <input type="checkbox"/> (2) | <input type="checkbox"/> (8) | <input type="checkbox"/> (9) |  | <input type="checkbox"/> (1) | <input type="checkbox"/> (2) | <input type="checkbox"/> (8) | <input type="checkbox"/> (9) |
| 22. Productos naturistas                                       | <input type="checkbox"/> (1) | <input type="checkbox"/> (2) | <input type="checkbox"/> (8) | <input type="checkbox"/> (9) |  | <input type="checkbox"/> (1) | <input type="checkbox"/> (2) | <input type="checkbox"/> (8) | <input type="checkbox"/> (9) |
| 23. Otros medicamentos                                         | <input type="checkbox"/> (1) | <input type="checkbox"/> (2) | <input type="checkbox"/> (8) | <input type="checkbox"/> (9) |  | <input type="checkbox"/> (1) | <input type="checkbox"/> (2) | <input type="checkbox"/> (8) | <input type="checkbox"/> (9) |

## Q.- PRÁCTICAS PREVENTIVAS

**Introducción P.88:** Entrevistador/a, léale al informante: “A continuación, le voy a preguntar sobre la vacunación de la gripe.”

**88. ¿Se ha vacunado de la gripe en la última campaña?**

Sí \_\_\_\_\_ ☐ 1  
No \_\_\_\_\_ ☐ 2

Si P.88 = 2 → Ir a P.88c

**88b. ¿Cuándo se vacunó?**

Año \_\_\_\_\_      
Mes \_\_\_\_\_

Ir a Introducción P.89

**88c. ¿Cuándo fue la última vez que se vacunó?**

Año 2019 \_\_\_\_\_ ☐ 1 → **88c2:** Mes    
Año 2018 \_\_\_\_\_ ☐ 2 → **88c3:** Mes    
Antes del año 2018 \_\_\_\_\_ ☐ 3  
No me he vacunado nunca \_\_\_\_\_ ☐ 4  
No sabe \_\_\_\_\_ ☐ 8  
No contesta \_\_\_\_\_ ☐ 9

**Introducción P.89:** Entrevistador/a, léale al informante: “Ahora le voy a preguntar sobre su tensión arterial, su nivel de colesterol y su nivel de azúcar”.

**89. ¿Le ha tomado la tensión alguna vez un profesional sanitario?**

Sí \_\_\_\_\_ ☐ 1  
No \_\_\_\_\_ ☐ 2  
No sabe \_\_\_\_\_ ☐ 8  
No contesta \_\_\_\_\_ ☐ 9

Si P.89= 2, 8, 9 → Ir a P.91

**90. La última vez que le tomaron la tensión fue:**

- En los últimos 12 meses \_\_\_\_\_ ☐ 1  
 Hace 1 año o más pero menos de 2 años \_\_\_\_\_ ☐ 2  
 Hace 2 años o más pero menos de 3 años \_\_\_\_\_ ☐ 3  
 Hace 3 años o más pero menos de 5 años \_\_\_\_\_ ☐ 4  
 Hace 5 años o más \_\_\_\_\_ ☐ 5  
 No sabe \_\_\_\_\_ ☐ 8  
 No contesta \_\_\_\_\_ ☐ 9

**91. ¿Le han medido alguna vez su nivel de colesterol en sangre?**

- Sí \_\_\_\_\_ ☐ 1  
 No \_\_\_\_\_ ☐ 2  
 No sabe \_\_\_\_\_ ☐ 8  
 No contesta \_\_\_\_\_ ☐ 9

Si P.91 = 2, 8, 9 → Ir a P.93

**92. ¿Cuándo fue la última vez que le midieron su nivel de colesterol en sangre?**

- En los últimos 12 meses \_\_\_\_\_ ☐ 1  
 Hace 1 año o más pero menos de 3 años \_\_\_\_\_ ☐ 2  
 Hace 3 años o más pero menos de 5 años \_\_\_\_\_ ☐ 3  
 Hace 5 años o más \_\_\_\_\_ ☐ 4  
 No sabe \_\_\_\_\_ ☐ 8  
 No contesta \_\_\_\_\_ ☐ 9

**93. ¿Le ha medido alguna vez su nivel de azúcar en sangre un profesional sanitario?**

- Sí \_\_\_\_\_ ☐ 1  
 No \_\_\_\_\_ ☐ 2  
 No sabe \_\_\_\_\_ ☐ 8  
 No contesta \_\_\_\_\_ ☐ 9

Si P.93 = 2, 8, 9 → Ir a Introducción P.95

**94. ¿Cuándo fue la última vez que un profesional sanitario le midió su nivel de azúcar en sangre?**

- En los últimos 12 meses \_\_\_\_\_ ☐ 1  
 Hace 1 año o más pero menos de 3 años \_\_\_\_\_ ☐ 2  
 Hace 3 años o más pero menos de 5 años \_\_\_\_\_ ☐ 3  
 Hace 5 años o más \_\_\_\_\_ ☐ 4  
 No sabe \_\_\_\_\_ ☐ 8  
 No contesta \_\_\_\_\_ ☐ 9

**Introducción P.95: Entrevistador/a, léale al informante: “Las siguientes preguntas hacen referencia a la prueba de sangre oculta en heces y a la colonoscopia.”**

**95. ¿Alguna vez le han hecho una prueba de sangre oculta en heces?**

- Sí \_\_\_\_\_ ☐ 1  
 No \_\_\_\_\_ ☐ 2  
 No sabe \_\_\_\_\_ ☐ 8  
 No contesta \_\_\_\_\_ ☐ 9

Si P.95 = 2, 8, 9 → Ir a P.98

**96. ¿Cuándo fue la última vez que le hicieron una prueba de sangre oculta en heces?**

- En los últimos 12 meses \_\_\_\_\_ ☐ 1  
 Hace 1 año o más pero menos de 2 años \_\_\_\_\_ ☐ 2  
 Hace 2 años o más pero menos de 3 años \_\_\_\_\_ ☐ 3  
 Hace 3 años o más pero menos de 5 años \_\_\_\_\_ ☐ 4  
 Hace 5 años o más \_\_\_\_\_ ☐ 5  
 No sabe \_\_\_\_\_ ☐ 8  
 No contesta \_\_\_\_\_ ☐ 9

**98. ¿Le han realizado alguna vez una colonoscopia?**

- Sí \_\_\_\_\_ ☐ 1  
 No \_\_\_\_\_ ☐ 2  
 No sabe \_\_\_\_\_ ☐ 8  
 No contesta \_\_\_\_\_ ☐ 9

Si P.98 = 2, 8, 9 y el adulto seleccionado es mujer → Ir a Introducción P.100

Si P.98 = 2, 8, 9 y el adulto seleccionado es hombre → Ir a Introducción P.106

**99. ¿Cuándo fue la última vez que le hicieron una colonoscopia?**

- En los últimos 12 meses \_\_\_\_\_ ☐ 1  
 Hace 1 año o más pero menos de 5 años \_\_\_\_\_ ☐ 2  
 Hace 5 años o más pero menos de 10 años \_\_\_\_\_ ☐ 3  
 Hace 10 años o más \_\_\_\_\_ ☐ 4  
 No sabe \_\_\_\_\_ ☐ 8  
 No contesta \_\_\_\_\_ ☐ 9

Si el adulto seleccionado es mujer → Ir a Introducción P.100

Si el adulto seleccionado es hombre → Ir a Introducción P.106

**Introducción P.100:** Entrevistador/a, léale al informante: “Las siguientes preguntas hacen referencia a las pruebas de mamografía y de citología vaginal”.

**100. ¿Le han hecho alguna vez una mamografía?**

- Sí \_\_\_\_\_ ☐ 1  
 No \_\_\_\_\_ ☐ 2  
 No sabe \_\_\_\_\_ ☐ 8  
 No contesta \_\_\_\_\_ ☐ 9

Si P.100 = 2, 8, 9 → Ir a P.103

**101. ¿Cuándo fue la última vez que le hicieron una mamografía?**

- En los últimos 12 meses \_\_\_\_\_ ☐ 1  
 Hace 1 año o más pero menos de 2 años \_\_\_\_\_ ☐ 2  
 Hace 2 años o más pero menos de 3 años \_\_\_\_\_ ☐ 3  
 Hace 3 años o más \_\_\_\_\_ ☐ 4  
 No sabe \_\_\_\_\_ ☐ 8  
 No contesta \_\_\_\_\_ ☐ 9

**103. ¿Le han hecho alguna vez una citología vaginal?**

- Sí \_\_\_\_\_ ☐ 1  
No \_\_\_\_\_ ☐ 2  
No sabe \_\_\_\_\_ ☐ 8  
No contesta \_\_\_\_\_ ☐ 9

Si P.103 = 2, 8, 9 → Ir a Introducción P.106

**104. ¿Cuándo fue la última vez que le hicieron una citología vaginal?**

- En los últimos 12 meses \_\_\_\_\_ 1  
Hace 1 año o más pero menos de 2 años \_\_\_\_\_ 2  
Hace 2 años o más pero menos de 3 años \_\_\_\_\_ 3  
Hace 3 años o más pero menos de 5 años \_\_\_\_\_ 4  
Hace 5 años o más \_\_\_\_\_ 5  
No sabe \_\_\_\_\_ 8  
No contesta \_\_\_\_\_ 9

## R.- NECESIDADES DE ATENCIÓN MÉDICA NO CUBIERTAS

**Introducción P.106:** Entrevistador/a, leáale al informante: “Por diferentes motivos puede tener que esperar para recibir atención médica e incluso puede no llegar a recibirla.”

**106. En los últimos 12 meses, ¿alguna vez ha tardado en recibir o ha carecido de asistencia médica cuando lo necesitaba por una lista de espera demasiado larga?**

- Sí \_\_\_\_\_ ☐ 1  
 No \_\_\_\_\_ ☐ 2  
 No he necesitado asistencia médica \_\_\_\_\_ ☐ 3  
 No sabe \_\_\_\_\_ ☐ 8  
 No contesta \_\_\_\_\_ ☐ 9

**107. En los últimos 12 meses, ¿alguna vez ha tardado en recibir o ha carecido de asistencia médica cuando lo necesitaba por dificultades relacionadas con el transporte o la distancia?**

- Sí \_\_\_\_\_ ☐ 1  
 No \_\_\_\_\_ ☐ 2  
 No he necesitado asistencia médica \_\_\_\_\_ ☐ 3  
 No sabe \_\_\_\_\_ ☐ 8  
 No contesta \_\_\_\_\_ ☐ 9

**108. En los últimos 12 meses, ¿ha necesitado alguno de los siguientes tipos de atención sanitaria y no se lo pudo permitir por motivos económicos?**

|                                                                                               | Sí                           | No                           | No lo he necesitado          | No sabe                      | No contesta                  |
|-----------------------------------------------------------------------------------------------|------------------------------|------------------------------|------------------------------|------------------------------|------------------------------|
| A. Atención médica                                                                            | <input type="checkbox"/> (1) | <input type="checkbox"/> (2) | <input type="checkbox"/> (3) | <input type="checkbox"/> (8) | <input type="checkbox"/> (9) |
| B. Atención dental                                                                            | <input type="checkbox"/> (1) | <input type="checkbox"/> (2) | <input type="checkbox"/> (3) | <input type="checkbox"/> (8) | <input type="checkbox"/> (9) |
| C. Algún medicamento que le habían recetado                                                   | <input type="checkbox"/> (1) | <input type="checkbox"/> (2) | <input type="checkbox"/> (3) | <input type="checkbox"/> (8) | <input type="checkbox"/> (9) |
| D. Atención de salud mental (Consulta al psicólogo, psiquiatra o psicoterapeuta, por ejemplo) | <input type="checkbox"/> (1) | <input type="checkbox"/> (2) | <input type="checkbox"/> (3) | <input type="checkbox"/> (8) | <input type="checkbox"/> (9) |

## MÓDULO DE DETERMINANTES DE LA SALUD

### S.- CARACTERÍSTICAS FÍSICAS

**Introducción P.109:** Entrevistador/a, léale al informante: “Ahora le voy a hacer unas preguntas sobre su talla y su peso.”

**109. ¿Podría decirme cuánto mide, aproximadamente, sin zapatos?**

|\_|\_|\_| cm

NS ☐ 998

NC ☐ 999

**110. ¿Y cuánto pesa, aproximadamente, sin zapatos ni ropa?**

|\_|\_|\_| kg

NS ☐ 998

NC ☐ 999

### T.- ACTIVIDAD FÍSICA

**Introducción P.111:** Entrevistador/a, léale al informante: “Ahora voy a hacerle unas preguntas sobre la actividad física que realiza.”

**111. ¿Cuál de estas posibilidades describe mejor su actividad principal en el centro de trabajo, centro de enseñanza, hogar (labores domésticas)...?**

Sentado/a la mayor parte de la jornada \_\_\_\_\_ ☐ 1

De pie la mayor parte de la jornada sin efectuar grandes desplazamientos o esfuerzos \_\_\_\_\_ ☐ 2

Caminando, llevando algún peso, efectuando desplazamientos frecuentes \_\_\_\_\_ ☐ 3

Realizando tareas que requieren gran esfuerzo físico \_\_\_\_\_ ☐ 4

No aplicable \_\_\_\_\_ ☐ 5

No sabe \_\_\_\_\_ ☐ 8

No contesta \_\_\_\_\_ ☐ 9

**112. ¿Cuál de estas posibilidades describe mejor la frecuencia con la que realiza alguna actividad física en su tiempo libre?**

- No hago ejercicio. El tiempo libre lo ocupo de forma casi completamente sedentaria (leer, ver la televisión, ir al cine, etc.) \_\_\_\_\_ ☐ 1
- Hago alguna actividad física o deportiva ocasional (caminar o pasear en bicicleta, jardinería, gimnasia suave, actividades recreativas que requieren un ligero esfuerzo, etc.) \_\_\_\_\_ ☐ 2
- Hago actividad física varias veces al mes (deportes, gimnasia, correr, natación, ciclismo, juegos de equipo, etc.) \_\_\_\_\_ ☐ 3
- Hago entrenamiento deportivo o físico varias veces a la semana \_\_\_\_\_ ☐ 4
- No sabe \_\_\_\_\_ ☐ 8
- No contesta \_\_\_\_\_ ☐ 9

**Introducción P.113:** Entrevistador/a, léale al informante: “Ahora me gustaría preguntarle por la forma de ir a los sitios a los que se desplaza habitualmente, por ejemplo, para ir a trabajar, a clase, para hacer la compra, etc.”

**113. En una semana de actividad normal, ¿cuántos días camina al menos 10 minutos seguidos para desplazarse?**

Número de días:

NS ☐ 8 NC ☐ 9

Si P.113 = 0, 8, 9 → Ir a P.115

**114. Habitualmente, en uno de esos días, ¿cuánto tiempo camina para desplazarse?**

**Nota P.114:** Entrevistador/a, no se leen las opciones. Marque la que más se ajuste a la respuesta del entrevistado.

- De 10 a 29 minutos \_\_\_\_\_ ☐ 1
- De 30 a 59 minutos \_\_\_\_\_ ☐ 2
- Una hora o más, pero menos de 2 horas \_\_\_\_\_ ☐ 3
- Dos horas o más, pero menos de 3 horas \_\_\_\_\_ ☐ 4
- Tres horas o más \_\_\_\_\_ ☐ 5
- No sabe \_\_\_\_\_ ☐ 8
- No contesta \_\_\_\_\_ ☐ 9

**115. En una semana de actividad normal, ¿cuántos días utiliza la bicicleta al menos durante 10 minutos para desplazarse?**

Número de días:

**NS** ☐ 8 **NC** ☐ 9

Si P.115 = 0, 8, 9 → Ir a P.117

**116. En uno de esos días, ¿cuánto tiempo utiliza habitualmente la bicicleta para desplazarse?**

Nota P.116: **Entrevistador/a, no se leen las opciones.** Marque la que más se ajuste a la respuesta del entrevistado.

- De 10 a 29 minutos ☐ 1  
 De 30 a 59 minutos ☐ 2  
 Una hora o más, pero menos de 2 horas ☐ 3  
 Dos horas o más, pero menos de 3 horas ☐ 4  
 Tres horas o más ☐ 5  
 No sabe ☐ 8  
 No contesta ☐ 9

**Introducción P.117: Entrevistador/a, léale al informante: “Las siguientes preguntas se refieren al ejercicio físico que realiza en su tiempo de ocio. No incluya el ejercicio declarado en las preguntas anteriores.”**

**117. En una semana de actividad normal, ¿cuántos días practica deporte, gimnasia, ciclismo, camina deprisa, etc., al menos 10 minutos seguidos?**

Número de días:

**NS** ☐ 8 **NC** ☐ 9

Si P.117 = 0, 8, 9 → Ir a P.119

**118. Y en total, ¿cuánto tiempo dedica a estas actividades en una semana normal?**

:  horas y minutos por semana

**NS** ☐ 98 **NC** ☐ 99

**119. En una semana de actividad normal, ¿cuántos días realiza actividades específicamente destinadas a fortalecer sus músculos? Considere todas las actividades de este tipo aunque ya las haya tenido en cuenta en la pregunta anterior.**

Número de días:

**NS** ☐ 8 **NC** ☐ 9

**119b. La última pregunta se refiere al tiempo que permanece sentado/a en un día normal. Incluya el tiempo @sentado/a en el trabajo, la casa, en clase, estudiando, leyendo y en el transporte, tiempo libre o viendo la Televisión. ¿Cuánto tiempo permaneció sentado/a en un día normal?**

- Horas por día  |  |
- Minutos por día  |  |
- **No sabe** ☐ 98
- **No contesta** ☐ 99

## U.- ALIMENTACIÓN

**Introducción P.120: Entrevistador/a, léale al informante: “Le voy a hacer unas preguntas sobre alimentación.”**

**120. ¿Con qué frecuencia consume los siguientes alimentos?**

| Alimentos                                                                            | Frecuencias de consumo                                                          |                            |                            |                             |                            |                            | No sabe                    | No contesta                |
|--------------------------------------------------------------------------------------|---------------------------------------------------------------------------------|----------------------------|----------------------------|-----------------------------|----------------------------|----------------------------|----------------------------|----------------------------|
|                                                                                      | Una o más veces al día                                                          | De 4 a 6 veces a la semana | Tres veces a la semana     | Una o dos veces a la semana | Menos de 1 vez a la semana | Nunca                      |                            |                            |
| Fruta fresca (excluyendo zumos)                                                      | <input type="checkbox"/> 1 <input type="checkbox"/> N° <input type="checkbox"/> | <input type="checkbox"/> 2 | <input type="checkbox"/> 3 | <input type="checkbox"/> 4  | <input type="checkbox"/> 5 | <input type="checkbox"/> 6 | <input type="checkbox"/> 8 | <input type="checkbox"/> 9 |
| Carne (pollo, ternera, cerdo, cordero...)                                            | <input type="checkbox"/> 1                                                      | <input type="checkbox"/> 2 | <input type="checkbox"/> 3 | <input type="checkbox"/> 4  | <input type="checkbox"/> 5 | <input type="checkbox"/> 6 | <input type="checkbox"/> 8 | <input type="checkbox"/> 9 |
| Huevos                                                                               | <input type="checkbox"/> 1                                                      | <input type="checkbox"/> 2 | <input type="checkbox"/> 3 | <input type="checkbox"/> 4  | <input type="checkbox"/> 5 | <input type="checkbox"/> 6 | <input type="checkbox"/> 8 | <input type="checkbox"/> 9 |
| Pescado                                                                              | <input type="checkbox"/> 1                                                      | <input type="checkbox"/> 2 | <input type="checkbox"/> 3 | <input type="checkbox"/> 4  | <input type="checkbox"/> 5 | <input type="checkbox"/> 6 | <input type="checkbox"/> 8 | <input type="checkbox"/> 9 |
| Pasta, arroz, patatas                                                                | <input type="checkbox"/> 1                                                      | <input type="checkbox"/> 2 | <input type="checkbox"/> 3 | <input type="checkbox"/> 4  | <input type="checkbox"/> 5 | <input type="checkbox"/> 6 | <input type="checkbox"/> 8 | <input type="checkbox"/> 9 |
| Pan, cereales                                                                        | <input type="checkbox"/> 1                                                      | <input type="checkbox"/> 2 | <input type="checkbox"/> 3 | <input type="checkbox"/> 4  | <input type="checkbox"/> 5 | <input type="checkbox"/> 6 | <input type="checkbox"/> 8 | <input type="checkbox"/> 9 |
| Verduras, ensaladas y hortalizas                                                     | <input type="checkbox"/> 1 <input type="checkbox"/> N° <input type="checkbox"/> | <input type="checkbox"/> 2 | <input type="checkbox"/> 3 | <input type="checkbox"/> 4  | <input type="checkbox"/> 5 | <input type="checkbox"/> 6 | <input type="checkbox"/> 8 | <input type="checkbox"/> 9 |
| Legumbres                                                                            | <input type="checkbox"/> 1                                                      | <input type="checkbox"/> 2 | <input type="checkbox"/> 3 | <input type="checkbox"/> 4  | <input type="checkbox"/> 5 | <input type="checkbox"/> 6 | <input type="checkbox"/> 8 | <input type="checkbox"/> 9 |
| Embutidos y fiambres                                                                 | <input type="checkbox"/> 1                                                      | <input type="checkbox"/> 2 | <input type="checkbox"/> 3 | <input type="checkbox"/> 4  | <input type="checkbox"/> 5 | <input type="checkbox"/> 6 | <input type="checkbox"/> 8 | <input type="checkbox"/> 9 |
| Productos lácteos (leche, queso, yogur)                                              | <input type="checkbox"/> 1                                                      | <input type="checkbox"/> 2 | <input type="checkbox"/> 3 | <input type="checkbox"/> 4  | <input type="checkbox"/> 5 | <input type="checkbox"/> 6 | <input type="checkbox"/> 8 | <input type="checkbox"/> 9 |
| Dulces (galletas, bollería, mermeladas, cereales con azúcar, caramelos)              | <input type="checkbox"/> 1                                                      | <input type="checkbox"/> 2 | <input type="checkbox"/> 3 | <input type="checkbox"/> 4  | <input type="checkbox"/> 5 | <input type="checkbox"/> 6 | <input type="checkbox"/> 8 | <input type="checkbox"/> 9 |
| Refrescos con azúcar                                                                 | <input type="checkbox"/> 1                                                      | <input type="checkbox"/> 2 | <input type="checkbox"/> 3 | <input type="checkbox"/> 4  | <input type="checkbox"/> 5 | <input type="checkbox"/> 6 | <input type="checkbox"/> 8 | <input type="checkbox"/> 9 |
| Comida rápida (pollo frito, bocadillos, pizzas, hamburguesas)                        | <input type="checkbox"/> 1                                                      | <input type="checkbox"/> 2 | <input type="checkbox"/> 3 | <input type="checkbox"/> 4  | <input type="checkbox"/> 5 | <input type="checkbox"/> 6 | <input type="checkbox"/> 8 | <input type="checkbox"/> 9 |
| Apertivos o comidas saladas de picar (patatas fritas, ganchitos, galletitas saladas) | <input type="checkbox"/> 1                                                      | <input type="checkbox"/> 2 | <input type="checkbox"/> 3 | <input type="checkbox"/> 4  | <input type="checkbox"/> 5 | <input type="checkbox"/> 6 | <input type="checkbox"/> 8 | <input type="checkbox"/> 9 |
| Zumo natural de frutas o verduras                                                    | <input type="checkbox"/> 1 <input type="checkbox"/> N° <input type="checkbox"/> | <input type="checkbox"/> 2 | <input type="checkbox"/> 3 | <input type="checkbox"/> 4  | <input type="checkbox"/> 5 | <input type="checkbox"/> 6 | <input type="checkbox"/> 8 | <input type="checkbox"/> 9 |

\*Solo si P120.1 (Fruta fresca) = 2 y P120.15 (Zumo natural) = 2 → se pasa a la pregunta 120.D

\*En otro caso → Ir a Introducción P.121

**120.D Considerando ahora de manera conjunta su consumo de fruta fresca y zumos naturales a la semana, ¿toma a diario al menos uno de ellos?**

- Sí \_\_\_\_\_ ☐ 1  
 No \_\_\_\_\_ ☐ 2  
 No sabe \_\_\_\_\_ ☐ 8  
 No contesta \_\_\_\_\_ ☐ 9

Si P120.D = 2, 8, 9 → Ir a Introducción P.121

**120.E ¿Cuántas piezas de fruta o vasos de zumo natural consume a diario?**

\*

NS ☐ 98 NC ☐ 99

## V.- CONSUMO DE TABACO Y EXPOSICIÓN AL HUMO DE TABACO

**Introducción P.121: Entrevistador/a, léale al informante: “Las siguientes preguntas se refieren al consumo de tabaco y a la exposición al humo de tabaco.”**

**121. ¿Podría decirme si fuma? No tenga en cuenta los cigarrillos electrónicos u otros dispositivos electrónicos similares.**

- Sí, fumo a diario ..... ☐ 1  
 Sí fumo, pero no a diario ..... ☐ 2  
 No fumo actualmente pero he fumado antes ..... ☐ 3  
 No fumo ni he fumado nunca de manera habitual ..... ☐ 4  
 No sabe ..... ☐ 8  
 No contesta ..... ☐ 9

Si P.121= 2,3,8,9 → Ir a P.124a

Si P.121= 4 → Ir a P124a

**123. Por término medio, ¿cuántos cigarrillos fuma usted al día?**

Número de cigarrillos:   NS ☐ 98 NC ☐ 99

**124. ¿A qué edad empezó a fumar?**

Edad en años:   NS ☐ 98 NC ☐ 99

Si P.121= 1 → Ir a P.124b

**124a. Aunque ahora no fume a diario, ¿Alguna vez ha fumado a diario durante al menos un año?**

Sí ☐ 1  
 No ☐ 2  
 No sabe ☐ 8  
 No contesta ☐ 9

Si P.124a= 2 ,8 ,9 → Ir a P.126

Si el adulto seleccionado ha contestado P.121= 1, presentar enunciado P124.B1

Si el adulto seleccionado ha contestado P.124a=1, presentar enunciado P124.B2

**124b1. ¿Cuántos años lleva fumando a diario?**

**124b2. ¿Durante cuántos años fumó a diario?**

Años:   NS ☐ 98 NC ☐ 99

**126. ¿Con qué frecuencia está expuesto/a al humo del tabaco en lugares cerrados? Considere solo aquellas situaciones en las que son otras personas las que están fumando.**

Todos los días \_\_\_\_\_ ☐ 1 → Desplegar 126a

→ 126a:    Menos de una hora al día \_\_\_\_\_ ☐ 1  
                  Entre 1 y 5 horas al día \_\_\_\_\_ ☐ 2  
                  Más de 5 horas al día \_\_\_\_\_ ☐ 3

Al menos una vez a la semana  
 (pero no todos los días) \_\_\_\_\_ ☐ 2  
 Menos de una vez por semana \_\_\_\_\_ ☐ 3  
 Nunca o casi nunca \_\_\_\_\_ ☐ 4  
 No sabe \_\_\_\_\_ ☐ 8  
 No contesta \_\_\_\_\_ ☐ 9

**126b. ¿Emplea cigarrillos electrónicos o aparatos electrónicos similares (ej: shisha electrónica, pipa electrónica...)?**

Sí \_\_\_\_\_ ☐ 1  
 No actualmente, pero sí lo he hecho con anterioridad \_\_\_\_\_ ☐ 2  
 No, nunca \_\_\_\_\_ ☐ 3  
 No sabe \_\_\_\_\_ ☐ 8  
 No contesta \_\_\_\_\_ ☐ 9

Si P.126b=2,3,8,9 → Ir a P.127

**126c. ¿Con qué frecuencia emplea cigarrillos electrónicos o aparatos electrónicos similares (ej: shisha electrónica, pipa electrónica...)?**

Diariamente ..... ☐ 1  
 Ocasionalmente ..... ☐ 2  
 No sabe ..... ☐ 8  
 No contesta ..... ☐ 9

## W.- CONSUMO DE ALCOHOL

**Introducción P.127:** Entrevistador/a, léale al informante: “Las siguientes preguntas se refieren al consumo de bebidas alcohólicas durante los últimos 12 meses.”

**127. Durante los últimos 12 meses, ¿con qué frecuencia ha tomado bebidas alcohólicas de cualquier tipo (es decir, cerveza, vino, licores, bebidas destiladas y combinados u otras bebidas alcohólicas)?**

- A diario o casi a diario ..... ☐ 01  
 5-6 días por semana ..... ☐ 02  
 3-4 días por semana ..... ☐ 03  
 1-2 días por semana ..... ☐ 04  
 2-3 días en un mes ..... ☐ 05  
 Una vez al mes ..... ☐ 06  
 Menos de una vez al mes ..... ☐ 07  
 No en los últimos 12 meses, he dejado de tomar alcohol ..... ☐ 08  
 Nunca o solamente unos sorbos para probarlo a lo largo de toda la vida ..... ☐ 09  
 No sabe ..... ☐ 98  
 No contesta ..... ☐ 99

Si P.127 = 05, 06, 07 → Ir a Introducción P.129

Si P.127 = 08, 09, 98, 99 → Ir a Introducción P.130

**128. Durante los últimos 12 meses, en una semana en que desarrolló usted su actividad habitual, ¿cuántas bebidas que contengan alcohol consumió a lo largo de la semana?**

|                  | Cervezas<br>con alcohol | Vinos,<br>Cava | Vermuts,<br>fino, jerez | Licores, anís,<br>pacharán | Whisky, coñac,<br>combinados ... | Bebidas 'locales'<br>sidra, carajillo |
|------------------|-------------------------|----------------|-------------------------|----------------------------|----------------------------------|---------------------------------------|
| <b>Lunes</b>     | 0 Cervezas              | Vasos, copas   | Copas                   | 0 Copas                    | Copas                            | Vasos, copas                          |
| <b>Martes</b>    | 0 Cervezas              | Vasos, copas   | Copas                   | 0 Copas                    | Copas                            | Vasos, copas                          |
| <b>Miércoles</b> | 0 Cervezas              | Vasos, copas   | Copas                   | 0 Copas                    | Copas                            | Vasos, copas                          |
| <b>Jueves</b>    | 0 Cervezas              | Vasos, copas   | Copas                   | 0 Copas                    | Copas                            | Vasos, copas                          |
| <b>Viernes</b>   | 0 Cervezas              | Vasos, copas   | Copas                   | 0 Copas                    | Copas                            | Vasos, copas                          |
| <b>Sábado</b>    | 0 Cervezas              | Vasos, copas   | Copas                   | 0 Copas                    | Copas                            | Vasos, copas                          |
| <b>Domingo</b>   | 0 Cervezas              | Vasos, copas   | Copas                   | 0 Copas                    | Copas                            | Vasos, copas                          |

Si el adulto seleccionado es hombre, presentar enunciado P129.A

Si el adulto seleccionado es mujer, presentar enunciado P129.B

**129.A Durante los últimos 12 meses, ¿con qué frecuencia ha tomado 6 o más bebidas estándar en una misma ocasión? (Por “ocasión” entendemos tomar las bebidas en un intervalo aproximado de cuatro a seis horas)**

**129.B Durante los últimos 12 meses, ¿con qué frecuencia ha tomado 5 o más bebidas estándar en una misma ocasión? (Por “ocasión” entendemos tomar las bebidas en un intervalo aproximado de cuatro a seis horas)**

- A diario o casi a diario..... ☐ 01  
 De 5 a 6 días por semana..... ☐ 02  
 De 3 a 4 días por semana..... ☐ 03  
 De 1 a 2 días por semana..... ☐ 04  
 De 2 a 3 días en un mes..... ☐ 05  
 Una vez al mes..... ☐ 06  
 Menos de una vez al mes..... ☐ 07  
 No en los últimos 12 meses..... ☐ 08  
 Nunca en toda mi vida..... ☐ 09  
 No sabe..... ☐ 98  
 No contesta..... ☐ 99

## X.- APOYO SOCIAL

**Introducción P.130:** Entrevistador/a, léale al informante: “Las siguientes preguntas hacen referencia a sus relaciones sociales.”

**130. En caso de tener un problema personal grave de cualquier tipo, ¿con cuántas personas cercanas a usted podría contar?**

- Ninguna..... ☐ 1  
 1 o 2 personas..... ☐ 2  
 De 3 a 5 personas..... ☐ 3  
 Más de 5 personas..... ☐ 4  
 No sabe..... ☐ 8  
 No contesta..... ☐ 9

**131. ¿En qué medida se interesan otras personas por lo que a usted le pasa?**

- Mucho \_\_\_\_\_ ☐ 1  
 Algo \_\_\_\_\_ ☐ 2  
 Ni mucho ni poco \_\_\_\_\_ ☐ 3  
 Poco \_\_\_\_\_ ☐ 4  
 Nada \_\_\_\_\_ ☐ 5  
 No sabe \_\_\_\_\_ ☐ 8  
 No contesta \_\_\_\_\_ ☐ 9

**132. ¿En qué medida le resultaría fácil obtener ayuda de los vecinos en caso de necesidad?**

- Muy fácil \_\_\_\_\_ ☐ 1  
 Fácil \_\_\_\_\_ ☐ 2  
 Es posible \_\_\_\_\_ ☐ 3  
 Difícil \_\_\_\_\_ ☐ 4  
 Muy difícil \_\_\_\_\_ ☐ 5  
 No sabe \_\_\_\_\_ ☐ 8  
 No contesta \_\_\_\_\_ ☐ 9

## Y.- CUIDADO A OTRAS PERSONAS CON PROBLEMAS DE SALUD

**Introducción P.133:** Entrevistador/a, léale al informante: “Las siguientes preguntas tratan de conocer si usted dedica tiempo al cuidado de alguna persona con problemas de salud.”

**133. ¿Cuida, al menos una vez a la semana, de alguna persona mayor o de alguien que tenga una dolencia crónica? No lo considere si forma parte de su trabajo.**

- Sí \_\_\_\_\_ ☐ 1  
 No \_\_\_\_\_ ☐ 2  
 No sabe \_\_\_\_\_ ☐ 8  
 No contesta \_\_\_\_\_ ☐ 9

Si P.133 <> 1 → Ir a INGRESOS

**134. La persona o personas a las que cuida son:**

- Familiares \_\_\_\_\_ ☐ 1  
 Otras personas \_\_\_\_\_ ☐ 2  
 No sabe \_\_\_\_\_ ☐ 8  
 No contesta \_\_\_\_\_ ☐ 9

**135. En total, ¿cuántas horas a la semana dedica al cuidado de esta/s persona/s?**

- Menos de 10 horas a la semana \_\_\_\_\_ ☐ 1  
 10 horas o más a la semana pero menos de 20 \_\_\_\_\_ ☐ 2  
 20 horas a la semana o más \_\_\_\_\_ ☐ 3  
 No sabe \_\_\_\_\_ ☐ 8  
 No contesta \_\_\_\_\_ ☐ 9

**Z.- INGRESOS**

**Introducción P.136:** Entrevistador/a, léale al informante: “Para poder hacer comparaciones entre los distintos tipos de problemas de salud de las familias, es necesario conocer unos datos muy básicos sobre el nivel de ingresos de la familia.

“A continuación le voy a preguntar por los ingresos regulares del hogar. No incluya los ingresos de las personas residentes empleadas en el hogar ni de los huéspedes fijos.”

**136. De los siguientes tipos de ingresos que le voy a leer, ¿podría decirme cuáles de ellos reciben usted y los demás miembros de su hogar?**  
**Debe considerar las fuentes de cada miembro del hogar y las conjuntas.**

- Ingresos del trabajo (por cuenta propia o ajena) \_\_\_\_\_ ☐  
 Prestación y subsidios por desempleo \_\_\_\_\_ ☐  
 Pensión por jubilación o viudedad \_\_\_\_\_ ☐  
 Pensión por invalidez o incapacidad \_\_\_\_\_ ☐  
 Prestaciones económicas por hijo a cargo u otras prestaciones económicas como ayudas a la familia... \_\_\_\_\_ ☐  
 Prestaciones o subvenciones relacionadas con la vivienda \_\_\_\_\_ ☐  
 Prestaciones o subvenciones relacionadas con la educación \_\_\_\_\_ ☐  
 Otros ingresos regulares / Otro subsidio o prestación social regular \_\_\_\_\_ ☐  
 Ninguna fuente de ingresos \_\_\_\_\_ ☐  
 No sabe \_\_\_\_\_ ☐  
 No contesta \_\_\_\_\_ ☐

Si entre las respuestas 1 y 8 hay una única respuesta marcada → Ir a **P.138B**

Si entre las respuestas 1 y 8 hay más de una respuesta marcada → Ir a **P.137**

Si P.136 = 98 ("No sabe") → Ir a **P138.A**

Si P.136 = 09, 99 ("Ninguna fuente de ingresos" o "No contesta") → **Idioma**

**137. De estas fuentes de ingresos monetarios del hogar citadas, ¿cuál diría que es la principal?**

Ir a **P.138C**

**138A. Aunque no pueda en este momento especificar las fuentes de ingresos, ¿podría decir cuál es aproximadamente el ingreso mensual neto de todo el hogar (es decir, sumando todas las fuentes y descontando las retenciones por impuestos, Seguridad Social, etc.)?**

**138B. Pensando en la fuente de ingresos que ha mencionado, ¿podría decir cuál es aproximadamente el ingreso mensual neto de todo el hogar (es decir, sumando todas las fuentes y descontando las retenciones por impuestos, Seguridad Social, etc.)?**

**138C. Pensando en las fuentes de ingresos que ha mencionado, ¿podría decir cuál es aproximadamente el ingreso mensual neto de todo el hogar (es decir, sumando todas las fuentes y descontando las retenciones por impuestos, Seguridad Social, etc.)?**

**138D. ¿Podría decir cuál es el importe mensual aproximado de los ingresos del hogar, (es decir, sumando todas las fuentes y descontando las retenciones por impuestos, Seguridad Social, etc.)?**

Cantidad |\_\_|\_\_|\_\_|\_\_|\_\_|\_\_| euros

No sabe \_\_\_\_\_ ☐ 999998

No contesta \_\_\_\_\_ ☐ 999999

**139. Si desconoce el valor exacto de los ingresos del hogar, ¿podría decirme cuál de los intervalos siguientes representa mejor el ingreso mensual neto de todo su hogar, tras las deducciones por los impuestos, Seguridad Social, etc.?**

- |                                      |                             |
|--------------------------------------|-----------------------------|
| Menos de 600 euros_____              | <input type="checkbox"/> 01 |
| De 600 a menos de 830 euros_____     | <input type="checkbox"/> 02 |
| De 830 a menos de 1100 euros_____    | <input type="checkbox"/> 03 |
| De 1100 a menos de 1.360 euros_____  | <input type="checkbox"/> 04 |
| De 1.360 a menos de 1.650 euros_____ | <input type="checkbox"/> 05 |
| De 1.650 a menos de 1.950 euros_____ | <input type="checkbox"/> 06 |
| De 1.950 a menos de 2.300 euros_____ | <input type="checkbox"/> 07 |
| De 2.300 a menos de 2.900 euros_____ | <input type="checkbox"/> 08 |
| De 2.900 a menos de 3.800 euros_____ | <input type="checkbox"/> 09 |
| De 3.800 a menos de 4.700 euros_____ | <input type="checkbox"/> 10 |
| De 4.700 a menos de 6.300 euros_____ | <input type="checkbox"/> 11 |
| De 6.300 euros en adelante_____      | <input type="checkbox"/> 12 |
| No sabe _____                        | <input type="checkbox"/> 98 |
| No contesta_____                     | <input type="checkbox"/> 99 |

## INFORMACIÓN SOBRE LA ENTREVISTA

### 141. Idioma

**Entrevistador/a**, anote el idioma empleado principalmente por el informante para responder al Cuestionario de Adulto:

- |                  |                            |
|------------------|----------------------------|
| Castellano _____ | <input type="checkbox"/> 1 |
| Catalán _____    | <input type="checkbox"/> 2 |
| Valenciano _____ | <input type="checkbox"/> 3 |
| Euskera _____    | <input type="checkbox"/> 4 |
| Gallego _____    | <input type="checkbox"/> 5 |
| Inglés _____     | <input type="checkbox"/> 6 |
| Otro _____       | <input type="checkbox"/> 7 |
